# Supplementary material for: Integrating genotypes and phenotypes improves long-term forecasts of seasonal influenza A/H3N2 evolution
Source: eLife. 2020 Sep 2;9:e60067. doi: 10.7554/eLife.60067 (PMC7553778; doi:10.7554/eLife.60067)
Supplement: Figure 11—source data 1. [file elife-60067-fig11-data1.csv]

strain_type	strain	abbreviation	timepoint	distance_to_future	relative_distance_to_future
vaccine	A/Fujian/411/2002	FU02	2003-10-01	9.44	N/A
vaccine	A/Wellington/1/2004	WE04	2004-10-01	6.08	N/A
vaccine	A/California/7/2004	CA04	2005-04-01	7.5	N/A
vaccine	A/Wisconsin/67/2005	WI05	2006-04-01	10.3	N/A
vaccine	A/Brisbane/10/2007	BR07	2007-10-01	5.78	N/A
vaccine	A/Perth/16/2009	PE09	2009-10-01	7.95	N/A
vaccine	A/Victoria/361/2011	VI11	2012-04-01	6.27	N/A
vaccine	A/Texas/50/2012	TX12	2013-10-01	8.65	N/A
vaccine	A/Switzerland/9715293/2013	SW13	2014-10-01	10.82	N/A
vaccine	A/HongKong/4801/2014	HK14	2015-10-01	6.09	N/A
vaccine	A/Singapore/Infimh-16-0019/2016	SI16	2017-10-01	8.61	N/A
vaccine	A/Switzerland/8060/2017	SW17	2018-10-01	15.17	N/A
observed closest	A/Jiangxi/20/2003	N/A	2003-10-01	4.08	-5.36
observed closest	A/Jeonnam/336/2004	N/A	2004-10-01	3.32	-2.76
observed closest	A/Malaysia/31944/2005	N/A	2005-04-01	3.59	-3.91
observed closest	A/England/61007/2006	N/A	2006-04-01	4.9	-5.4
observed closest	A/Hanoi/BM238/2007	N/A	2007-10-01	3.41	-2.37
observed closest	A/BadenWurttemberg/209/2009	N/A	2009-10-01	4.92	-3.03
observed closest	A/Anhui-Jinan/173/2012	N/A	2012-04-01	2.87	-3.39
observed closest	A/AmericanSamoa/4796/2013	N/A	2013-10-01	5.44	-3.21
observed closest	A/Asturias/1949/2014	N/A	2014-10-01	3.18	-7.64
observed closest	A/Brazil/187/2015	N/A	2015-10-01	6.08	-0.0
observed closest	A/Ayutthaya/73/2017	N/A	2017-10-01	7.27	-1.34
observed closest	A/Shanghai-Huangpu/11325/2018	N/A	2018-10-01	7.67	-7.49
estimated closest by naive	A/Malaysia/25849/2003	N/A	2003-10-01	7.49	-1.95
estimated closest by naive	A/Dakar/18/2004	N/A	2004-10-01	4.38	-1.7
estimated closest by naive	A/Austria/212187/2005	N/A	2005-04-01	4.6	-2.89
estimated closest by naive	A/Anhui-Baohe/10/2005	N/A	2006-04-01	5.37	-4.94
estimated closest by naive	A/Honduras/AF1426/2007	N/A	2007-10-01	3.8	-1.98
estimated closest by naive	A/Morobe/10/2009	N/A	2009-10-01	6.95	-1.0
estimated closest by naive	A/Alborz/927/2012	N/A	2012-04-01	6.12	-0.15
estimated closest by naive	A/AmericanSamoa/4796/2013	N/A	2013-10-01	5.44	-3.21
estimated closest by naive	A/Austria/96/2014	N/A	2014-10-01	9.82	-1.01
estimated closest by naive	A/Alaska/115/2015	N/A	2015-10-01	6.09	-0.0
estimated closest by naive	A/Philippines/7/2017	N/A	2017-10-01	7.81	-0.8
estimated closest by naive	A/Chanthaburi/101/2018	N/A	2018-10-01	8.48	-6.68
estimated closest by ne_star-lbi	A/Australia/NHRC0001/2003	N/A	2003-10-01	8.44	-1.01
estimated closest by ne_star-lbi	A/Dakar/18/2004	N/A	2004-10-01	4.38	-1.7
estimated closest by ne_star-lbi	A/Austria/212187/2005	N/A	2005-04-01	4.6	-2.89
estimated closest by ne_star-lbi	A/Canada/CN-RV657-06/2006	N/A	2006-04-01	5.36	-4.94
estimated closest by ne_star-lbi	A/Aichi/67/2007	N/A	2007-10-01	3.78	-2.0
estimated closest by ne_star-lbi	A/Morobe/10/2009	N/A	2009-10-01	6.95	-1.0
estimated closest by ne_star-lbi	A/Aichi/233/2011	N/A	2012-04-01	3.72	-2.54
estimated closest by ne_star-lbi	A/Chiba-C/44/2013	N/A	2013-10-01	6.54	-2.11
estimated closest by ne_star-lbi	A/Bangladesh/2008/2014	N/A	2014-10-01	3.88	-6.94
estimated closest by ne_star-lbi	A/Arizona/7/2015	N/A	2015-10-01	7.33	1.24
estimated closest by ne_star-lbi	A/Akita/21/2017	N/A	2017-10-01	7.47	-1.15
estimated closest by ne_star-lbi	A/Bolivia/1914/2018	N/A	2018-10-01	17.08	1.91
estimated closest by cTiter_x-ne_star	A/Hanoi/BM766/2003	N/A	2003-10-01	6.5	-2.95
estimated closest by cTiter_x-ne_star	A/Dakar/18/2004	N/A	2004-10-01	4.38	-1.7
estimated closest by cTiter_x-ne_star	A/Austria/212187/2005	N/A	2005-04-01	4.6	-2.89
estimated closest by cTiter_x-ne_star	A/Anhui-Baohe/10/2005	N/A	2006-04-01	5.37	-4.94
estimated closest by cTiter_x-ne_star	A/Aichi/67/2007	N/A	2007-10-01	3.78	-2.0
estimated closest by cTiter_x-ne_star	A/Aichi/689/2009	N/A	2009-10-01	7.93	-0.02
estimated closest by cTiter_x-ne_star	A/Alaska/17/2011	N/A	2012-04-01	7.02	0.75
estimated closest by cTiter_x-ne_star	A/Alabama/7/2013	N/A	2013-10-01	6.89	-1.76
estimated closest by cTiter_x-ne_star	A/Bangladesh/2008/2014	N/A	2014-10-01	3.88	-6.94
estimated closest by cTiter_x-ne_star	A/Alaska/115/2015	N/A	2015-10-01	6.09	-0.0
estimated closest by cTiter_x-ne_star	A/Philippines/7/2017	N/A	2017-10-01	7.81	-0.8
estimated closest by cTiter_x-ne_star	A/Bangladesh/215/2018	N/A	2018-10-01	10.42	-4.75
