# Supplementary material for: Integrating genotypes and phenotypes improves long-term forecasts of seasonal influenza A/H3N2 evolution
Source: eLife. 2020 Sep 2;9:e60067. doi: 10.7554/eLife.60067 (PMC7553778; doi:10.7554/eLife.60067)
Supplement: Supplementary file 1. [file elife-60067-supp1.xlsx]

## Sheet: supplemental_file_S1_gisaid_ack
strain	virus	accession	date	region	country	division	location	passage	age	gender	originating_lab	submitting_lab
A/England/260/1991	flu	EPI365778	1991-09-15	europe	united_kingdom	england	england	cell	?	?	?	Other Database Import
A/Bcm/1/1991	flu	EPI359491	1991-11-25	north_america	usa	texas	baylor	cell	?	?	?	Other Database Import
A/Geneva/6447/1991	flu	EPI362541	1991-11-27	europe	switzerland	geneva	geneva	cell	?	?	?	Other Database Import
A/Paris/417/1992	flu	EPI366036	1991-12-01	europe	france	ile_de_france	paris	cell	?	?	?	Other Database Import
A/Paris/564/1991	flu	EPI366084	1991-12-01	europe	france	ile_de_france	paris	cell	?	?	?	Other Database Import
A/Paris/512/1991	flu	EPI366068	1991-12-01	europe	france	ile_de_france	paris	cell	?	?	?	Other Database Import
A/Paris/457/1992	flu	EPI366052	1991-12-01	europe	france	ile_de_france	paris	cell	?	?	?	Other Database Import
A/Paris/407/1992	flu	EPI366019	1991-12-01	europe	france	ile_de_france	paris	cell	?	?	?	Other Database Import
A/Paris/548/1992	flu	EPI366076	1991-12-01	europe	france	ile_de_france	paris	cell	?	?	?	Other Database Import
A/Paris/597/1991	flu	EPI366100	1991-12-01	europe	france	ile_de_france	paris	cell	?	?	?	Other Database Import
A/Netherlands/891/1991	flu	EPI365890	1991-12-04	europe	netherlands	netherlands	netherlands	cell	?	?	?	Other Database Import
A/Lyon/1276/1991	flu	EPI365818	1991-12-12	europe	france	auvergne_rhone_alpes	lyon	cell	?	?	?	Other Database Import
A/Lyon/1189/1991	flu	EPI365810	1991-12-12	europe	france	auvergne_rhone_alpes	lyon	cell	?	?	?	Other Database Import
A/Lyon/1373/1991	flu	EPI365834	1991-12-16	europe	france	auvergne_rhone_alpes	lyon	cell	?	?	?	Other Database Import
A/Lyon/1337/1991	flu	EPI365826	1991-12-16	europe	france	auvergne_rhone_alpes	lyon	cell	?	?	?	Other Database Import
A/Stockholm/20/1991	flu	EPI362548	1991-12-17	europe	sweden	stockholm	stockholm	cell	?	?	?	Other Database Import
A/Siena/1/1991	flu	EPI171165	1991-12-17	europe	italy	tuscany	siena	undetermined	?	?	?	Other Database Import
A/Lyon/23672/1991	flu	EPI365850	1991-12-17	europe	france	auvergne_rhone_alpes	lyon	cell	?	?	?	Other Database Import
A/Siena/3/1991	flu	EPI190228	1991-12-19	europe	italy	tuscany	siena	undetermined	?	?	?	Other Database Import
A/Netherlands/938/1992	flu	EPI24028	1991-12-19	europe	netherlands	netherlands	netherlands	undetermined	?	?	?	Other Database Import
A/Siena/5/1991	flu	EPI165681	1991-12-21	europe	italy	tuscany	siena	undetermined	?	?	?	Other Database Import
A/Siena/6/1991	flu	EPI165689	1991-12-24	europe	italy	tuscany	siena	undetermined	?	?	?	Other Database Import
A/Lyon/24103/1991	flu	EPI365858	1991-12-24	europe	france	auvergne_rhone_alpes	lyon	cell	?	?	?	Other Database Import
A/Lyon/24222/1991	flu	EPI365866	1991-12-26	europe	france	auvergne_rhone_alpes	lyon	cell	?	?	?	Other Database Import
A/Lyon/1594/1991	flu	EPI365842	1991-12-26	europe	france	auvergne_rhone_alpes	lyon	cell	?	?	?	Other Database Import
A/Oviedo/31/1992	flu	EPI365995	1991-12-28	europe	spain	asturias	oviedo	cell	?	?	?	Other Database Import
A/Paris/583/1992	flu	EPI366092	1992-01-01	europe	france	ile_de_france	paris	cell	?	?	?	Other Database Import
A/Paris/614/1992	flu	EPI366108	1992-01-01	europe	france	ile_de_france	paris	cell	?	?	?	Other Database Import
A/Bcm/2/1992	flu	EPI427177	1992-01-02	north_america	usa	texas	baylor	cell	?	?	?	Other Database Import
A/Netherlands/819/1992	flu	EPI365946	1992-01-09	europe	netherlands	netherlands	netherlands	cell	?	?	?	Other Database Import
A/Enschede/1285/1992	flu	EPI362561	1992-01-09	europe	netherlands	overijssel	enschede	cell	?	?	?	Other Database Import
A/Nijmegen/3126/1992	flu	EPI365979	1992-01-09	europe	netherlands	gelderland	nijmegen	cell	?	?	?	Other Database Import
A/Netherlands/935/1992	flu	EPI365956	1992-01-10	europe	netherlands	netherlands	netherlands	cell	?	?	?	Other Database Import
A/Geneva/5113/1992	flu	EPI365906	1992-01-15	europe	switzerland	geneva	geneva	cell	?	?	?	Other Database Import
A/Finland/220/1992	flu	EPI362574	1992-01-24	europe	finland	finland	finland	cell	?	?	?	Other Database Import
A/Rotterdam/100540/1992	flu	EPI362595	1992-01-26	europe	netherlands	south_holland	rotterdam	cell	?	?	?	Other Database Import
A/Netherlands/823/1992	flu	EPI545281	1992-02-03	europe	netherlands	netherlands	netherlands	cell	?	?	?	Other Database Import
A/Nijmegen/3129/1992	flu	EPI365987	1992-02-07	europe	netherlands	gelderland	nijmegen	cell	?	?	?	Other Database Import
A/Stockholm/8/1992	flu	EPI362615	1992-03-02	europe	sweden	stockholm	stockholm	cell	?	?	?	Other Database Import
A/SouthAustralia/8/1992	flu	EPI362608	1992-03-05	oceania	australia	south_australia	south_australia	cell	?	?	?	Other Database Import
A/Houston/56798/1992	flu	EPI365914	1992-04-03	north_america	usa	texas	houston	cell	?	?	?	Other Database Import
A/SouthAustralia/27/1992	flu	EPI366130	1992-04-06	oceania	australia	south_australia	south_australia	cell	?	?	?	Other Database Import
A/Victoria/33/1992	flu	EPI362622	1992-06-29	oceania	australia	victoria	victoria	cell	?	?	?	Other Database Import
A/Victoria/68/1992	flu	EPI366179	1992-07-17	oceania	australia	victoria	victoria	cell	?	?	?	Other Database Import
A/Umea/1982/1992	flu	EPI366163	1992-10-01	europe	sweden	vasterbottens	umea	cell	?	?	?	Other Database Import
A/Stockholm/12/1992	flu	EPI366139	1992-11-01	europe	sweden	stockholm	stockholm	cell	?	?	?	Other Database Import
A/Netherlands/17/1993	flu	EPI362658	1993-01-01	europe	netherlands	netherlands	netherlands	cell	?	?	?	Other Database Import
A/Singapore/3/1993	flu	EPI365666	1993-01-06	southeast_asia	singapore	singapore	singapore	cell	?	?	?	Other Database Import
A/NewYork/754/1993	flu	EPI38683	1993-01-16	north_america	usa	new_york	new_york	cell	?	?	?	Other Database Import
A/NewYork/779/1993	flu	EPI37752	1993-02-01	north_america	usa	new_york	new_york	cell	?	?	?	Other Database Import
A/NewYork/778/1993	flu	EPI37733	1993-02-02	north_america	usa	new_york	new_york	cell	?	?	?	Other Database Import
A/NewYork/756/1993	flu	EPI36213	1993-02-02	north_america	usa	new_york	new_york	cell	?	?	?	Other Database Import
A/NewYork/793/1993	flu	EPI40999	1993-02-02	north_america	usa	new_york	new_york	cell	?	?	?	Other Database Import
A/NewYork/758/1993	flu	EPI36232	1993-02-03	north_america	usa	new_york	new_york	cell	?	?	?	Other Database Import
A/NewYork/795/1993	flu	EPI40044	1993-02-04	north_america	usa	new_york	new_york	cell	?	?	?	Other Database Import
A/NewYork/762/1993	flu	EPI36308	1993-02-04	north_america	usa	new_york	new_york	cell	?	?	?	Other Database Import
A/NewYork/790/1993	flu	EPI39968	1993-02-04	north_america	usa	new_york	new_york	cell	?	?	?	Other Database Import
A/NewYork/760/1993	flu	EPI36270	1993-02-09	north_america	usa	new_york	new_york	cell	?	?	?	Other Database Import
A/NewYork/766/1993	flu	EPI39740	1993-02-15	north_america	usa	new_york	new_york	cell	?	?	?	Other Database Import
A/NewYork/776/1993	flu	EPI39854	1993-02-18	north_america	usa	new_york	new_york	cell	?	?	?	Other Database Import
A/NewYork/796/1993	flu	EPI41018	1993-02-18	north_america	usa	new_york	new_york	cell	?	?	?	Other Database Import
A/NewYork/764/1993	flu	EPI36346	1993-02-23	north_america	usa	new_york	new_york	cell	?	?	?	Other Database Import
A/Netherlands/126/1993	flu	EPI366793	1993-02-23	europe	netherlands	netherlands	netherlands	cell	?	?	?	Other Database Import
A/NewYork/774/1993	flu	EPI39835	1993-02-25	north_america	usa	new_york	new_york	cell	?	?	?	Other Database Import
A/NewYork/788/1993	flu	EPI39930	1993-02-26	north_america	usa	new_york	new_york	cell	?	?	?	Other Database Import
A/NewYork/802/1993	flu	EPI40139	1993-03-02	north_america	usa	new_york	new_york	cell	?	?	?	Other Database Import
A/NewYork/780/1993	flu	EPI39873	1993-03-02	north_america	usa	new_york	new_york	cell	?	?	?	Other Database Import
A/NewYork/761/1993	flu	EPI36289	1993-03-03	north_america	usa	new_york	new_york	cell	?	?	?	Other Database Import
A/NewYork/765/1993	flu	EPI36365	1993-03-03	north_america	usa	new_york	new_york	cell	?	?	?	Other Database Import
A/NewYork/770/1993	flu	EPI37657	1993-03-04	north_america	usa	new_york	new_york	cell	?	?	?	Other Database Import
A/NewYork/794/1993	flu	EPI40025	1993-03-04	north_america	usa	new_york	new_york	cell	?	?	?	Other Database Import
A/Netherlands/165/1993	flu	EPI366801	1993-03-05	europe	netherlands	netherlands	netherlands	cell	?	?	?	Other Database Import
A/NewYork/759/1993	flu	EPI36251	1993-03-08	north_america	usa	new_york	new_york	cell	?	?	?	Other Database Import
A/NewYork/768/1993	flu	EPI39759	1993-03-09	north_america	usa	new_york	new_york	cell	?	?	?	Other Database Import
A/NewYork/792/1993	flu	EPI40006	1993-03-09	north_america	usa	new_york	new_york	cell	?	?	?	Other Database Import
A/NewYork/798/1993	flu	EPI40082	1993-03-09	north_america	usa	new_york	new_york	cell	?	?	?	Other Database Import
A/NewYork/803/1993	flu	EPI40158	1993-03-09	north_america	usa	new_york	new_york	cell	?	?	?	Other Database Import
A/NewYork/801/1993	flu	EPI40120	1993-03-10	north_america	usa	new_york	new_york	cell	?	?	?	Other Database Import
A/NewYork/772/1993	flu	EPI39797	1993-03-10	north_america	usa	new_york	new_york	cell	?	?	?	Other Database Import
A/NewYork/787/1993	flu	EPI39911	1993-03-10	north_america	usa	new_york	new_york	cell	?	?	?	Other Database Import
A/NewYork/799/1993	flu	EPI40101	1993-03-10	north_america	usa	new_york	new_york	cell	?	?	?	Other Database Import
A/NewYork/791/1993	flu	EPI39987	1993-03-11	north_america	usa	new_york	new_york	cell	?	?	?	Other Database Import
A/NewYork/800/1993	flu	EPI46402	1993-03-11	north_america	usa	new_york	new_york	cell	?	?	?	Other Database Import
A/NewYork/775/1993	flu	EPI37695	1993-03-11	north_america	usa	new_york	new_york	cell	?	?	?	Other Database Import
A/NewYork/755/1993	flu	EPI38702	1993-03-12	north_america	usa	new_york	new_york	cell	?	?	?	Other Database Import
A/NewYork/797/1993	flu	EPI40063	1993-03-16	north_america	usa	new_york	new_york	cell	?	?	?	Other Database Import
A/NewYork/786/1993	flu	EPI37771	1993-03-16	north_america	usa	new_york	new_york	cell	?	?	?	Other Database Import
A/NewYork/769/1993	flu	EPI39778	1993-03-16	north_america	usa	new_york	new_york	cell	?	?	?	Other Database Import
A/NewYork/777/1993	flu	EPI37714	1993-03-20	north_america	usa	new_york	new_york	cell	?	?	?	Other Database Import
A/NewYork/763/1993	flu	EPI36327	1993-03-26	north_america	usa	new_york	new_york	cell	?	?	?	Other Database Import
A/NewYork/781/1993	flu	EPI38721	1993-03-26	north_america	usa	new_york	new_york	cell	?	?	?	Other Database Import
A/NewYork/757/1993	flu	EPI39721	1993-03-26	north_america	usa	new_york	new_york	cell	?	?	?	Other Database Import
A/NewYork/785/1993	flu	EPI38778	1993-03-26	north_america	usa	new_york	new_york	cell	?	?	?	Other Database Import
A/NewYork/773/1993	flu	EPI39816	1993-03-31	north_america	usa	new_york	new_york	cell	?	?	?	Other Database Import
A/NewYork/783/1993	flu	EPI38759	1993-04-01	north_america	usa	new_york	new_york	cell	?	?	?	Other Database Import
A/NewYork/782/1993	flu	EPI38740	1993-04-03	north_america	usa	new_york	new_york	cell	?	?	?	Other Database Import
A/NewYork/767/1993	flu	EPI37638	1993-04-05	north_america	usa	new_york	new_york	cell	?	?	?	Other Database Import
A/NewYork/789/1993	flu	EPI39949	1993-04-05	north_america	usa	new_york	new_york	cell	?	?	?	Other Database Import
A/NewYork/784/1993	flu	EPI39892	1993-04-19	north_america	usa	new_york	new_york	cell	?	?	?	Other Database Import
A/NewYork/771/1993	flu	EPI37676	1993-04-19	north_america	usa	new_york	new_york	cell	?	?	?	Other Database Import
A/Netherlands/241/1993	flu	EPI362670	1993-10-13	europe	netherlands	netherlands	netherlands	cell	?	?	?	Other Database Import
A/Stockholm/20/1993	flu	EPI362697	1993-11-03	europe	sweden	stockholm	stockholm	cell	?	?	?	Other Database Import
A/NewYork/751/1993	flu	EPI34921	1993-11-08	north_america	usa	new_york	new_york	cell	?	?	?	Other Database Import
A/Lyon/1815/1993	flu	EPI366400	1993-11-30	europe	france	auvergne_rhone_alpes	lyon	cell	?	?	?	Other Database Import
A/Lyon/22686/1993	flu	EPI362633	1993-12-02	europe	france	auvergne_rhone_alpes	lyon	cell	?	?	?	Other Database Import
A/NewYork/712/1993	flu	EPI35624	1993-12-02	north_america	usa	new_york	new_york	cell	?	?	?	Other Database Import
A/Netherlands/357/1993	flu	EPI366809	1993-12-06	europe	netherlands	netherlands	netherlands	cell	?	?	?	Other Database Import
A/Bcm/1/1993	flu	EPI359492	1993-12-20	north_america	usa	texas	baylor	cell	?	?	?	Other Database Import
A/Singapore/19/1993	flu	EPI362690	1993-12-21	southeast_asia	singapore	singapore	singapore	cell	?	?	?	Other Database Import
A/NewYork/752/1993	flu	EPI35795	1993-12-30	north_america	usa	new_york	new_york	cell	?	?	?	Other Database Import
A/NewYork/706/1993	flu	EPI46269	1993-12-30	north_america	usa	new_york	new_york	cell	?	?	?	Other Database Import
A/NewYork/723/1994	flu	EPI38151	1994-01-02	north_america	usa	new_york	new_york	cell	?	?	?	Other Database Import
A/NewYork/704/1994	flu	EPI48359	1994-01-03	north_america	usa	new_york	new_york	cell	?	?	?	Other Database Import
A/NewYork/730/1994	flu	EPI36574	1994-01-04	north_america	usa	new_york	new_york	cell	?	?	?	Other Database Import
A/Netherlands/18/1994	flu	EPI366897	1994-01-05	europe	netherlands	netherlands	netherlands	cell	?	?	?	Other Database Import
A/NewYork/709/1994	flu	EPI35586	1994-01-06	north_america	usa	new_york	new_york	cell	?	?	?	Other Database Import
A/NewYork/732/1994	flu	EPI34465	1994-01-06	north_america	usa	new_york	new_york	cell	?	?	?	Other Database Import
A/NewYork/734/1994	flu	EPI36593	1994-01-06	north_america	usa	new_york	new_york	cell	?	?	?	Other Database Import
A/NewYork/743/1994	flu	EPI39118	1994-01-07	north_america	usa	new_york	new_york	cell	?	?	?	Other Database Import
A/NewYork/742/1994	flu	EPI39099	1994-01-10	north_america	usa	new_york	new_york	cell	?	?	?	Other Database Import
A/NewYork/749/1994	flu	EPI37315	1994-01-11	north_america	usa	new_york	new_york	cell	?	?	?	Other Database Import
A/NewYork/708/1994	flu	EPI34446	1994-01-11	north_america	usa	new_york	new_york	cell	?	?	?	Other Database Import
A/NewYork/711/1994	flu	EPI35605	1994-01-12	north_america	usa	new_york	new_york	cell	?	?	?	Other Database Import
A/NewYork/747/1994	flu	EPI37277	1994-01-12	north_america	usa	new_york	new_york	cell	?	?	?	Other Database Import
A/NewYork/721/1994	flu	EPI35719	1994-01-13	north_america	usa	new_york	new_york	cell	?	?	?	Other Database Import
A/NewYork/714/1994	flu	EPI37239	1994-01-14	north_america	usa	new_york	new_york	cell	?	?	?	Other Database Import
A/NewYork/735/1994	flu	EPI38208	1994-01-14	north_america	usa	new_york	new_york	cell	?	?	?	Other Database Import
A/NewYork/740/1994	flu	EPI38284	1994-01-15	north_america	usa	new_york	new_york	cell	?	?	?	Other Database Import
A/NewYork/716/1994	flu	EPI35662	1994-01-17	north_america	usa	new_york	new_york	cell	?	?	?	Other Database Import
A/NewYork/748/1994	flu	EPI37296	1994-01-17	north_america	usa	new_york	new_york	cell	?	?	?	Other Database Import
A/NewYork/744/1994	flu	EPI39137	1994-01-18	north_america	usa	new_york	new_york	cell	?	?	?	Other Database Import
A/NewYork/717/1994	flu	EPI40391	1994-01-19	north_america	usa	new_york	new_york	cell	?	?	?	Other Database Import
A/NewYork/719/1994	flu	EPI35681	1994-01-20	north_america	usa	new_york	new_york	cell	?	?	?	Other Database Import
A/NewYork/736/1994	flu	EPI38227	1994-01-21	north_america	usa	new_york	new_york	cell	?	?	?	Other Database Import
A/NewYork/720/1994	flu	EPI35700	1994-01-24	north_america	usa	new_york	new_york	cell	?	?	?	Other Database Import
A/NewYork/750/1994	flu	EPI38322	1994-01-25	north_america	usa	new_york	new_york	cell	?	?	?	Other Database Import
A/NewYork/724/1994	flu	EPI38170	1994-01-27	north_america	usa	new_york	new_york	cell	?	?	?	Other Database Import
A/NewYork/725/1994	flu	EPI38189	1994-01-30	north_america	usa	new_york	new_york	cell	?	?	?	Other Database Import
A/NewYork/727/1994	flu	EPI35757	1994-01-31	north_america	usa	new_york	new_york	cell	?	?	?	Other Database Import
A/NewYork/705/1994	flu	EPI37163	1994-01-31	north_america	usa	new_york	new_york	cell	?	?	?	Other Database Import
A/NewYork/728/1994	flu	EPI35776	1994-02-01	north_america	usa	new_york	new_york	cell	?	?	?	Other Database Import
A/NewYork/737/1994	flu	EPI44214	1994-02-03	north_america	usa	new_york	new_york	cell	?	?	?	Other Database Import
A/NewYork/738/1994	flu	EPI38246	1994-02-04	north_america	usa	new_york	new_york	cell	?	?	?	Other Database Import
A/NewYork/745/1994	flu	EPI39156	1994-02-07	north_america	usa	new_york	new_york	cell	?	?	?	Other Database Import
A/NewYork/733/1994	flu	EPI33584	1994-02-07	north_america	usa	new_york	new_york	cell	?	?	?	Other Database Import
A/NewYork/710/1994	flu	EPI37201	1994-02-09	north_america	usa	new_york	new_york	cell	?	?	?	Other Database Import
A/NewYork/726/1994	flu	EPI35738	1994-02-09	north_america	usa	new_york	new_york	cell	?	?	?	Other Database Import
A/NewYork/718/1994	flu	EPI38132	1994-02-09	north_america	usa	new_york	new_york	cell	?	?	?	Other Database Import
A/NewYork/707/1994	flu	EPI37182	1994-02-10	north_america	usa	new_york	new_york	cell	?	?	?	Other Database Import
A/NewYork/713/1994	flu	EPI37220	1994-02-14	north_america	usa	new_york	new_york	cell	?	?	?	Other Database Import
A/NewYork/739/1994	flu	EPI38265	1994-02-14	north_america	usa	new_york	new_york	cell	?	?	?	Other Database Import
A/NewYork/753/1994	flu	EPI38341	1994-02-15	north_america	usa	new_york	new_york	cell	?	?	?	Other Database Import
A/NewYork/746/1994	flu	EPI37258	1994-02-21	north_america	usa	new_york	new_york	cell	?	?	?	Other Database Import
A/NewYork/729/1994	flu	EPI36555	1994-02-25	north_america	usa	new_york	new_york	cell	?	?	?	Other Database Import
A/NewYork/722/1994	flu	EPI36536	1994-03-02	north_america	usa	new_york	new_york	cell	?	?	?	Other Database Import
A/NewYork/741/1994	flu	EPI38303	1994-03-03	north_america	usa	new_york	new_york	cell	?	?	?	Other Database Import
A/NewYork/731/1994	flu	EPI39080	1994-03-09	north_america	usa	new_york	new_york	cell	?	?	?	Other Database Import
A/HongKong/2/1994	flu	EPI362735	1994-06-01	china	hong_kong	hong_kong	hong_kong	cell	?	?	?	Other Database Import
A/HongKong/1/1994	flu	EPI362728	1994-06-01	china	hong_kong	hong_kong	hong_kong	cell	?	?	?	Other Database Import
A/SouthAustralia/25/1994	flu	EPI362770	1994-06-09	oceania	australia	south_australia	south_australia	cell	?	?	?	Other Database Import
A/NewYork/715/1994	flu	EPI35643	1994-07-29	north_america	usa	new_york	new_york	cell	?	?	?	Other Database Import
A/HongKong/56/1994	flu	EPI366888	1994-08-02	china	hong_kong	hong_kong	hong_kong	cell	?	?	?	Other Database Import
A/NewYork/654/1994	flu	EPI34712	1994-11-03	north_america	usa	new_york	new_york	cell	?	?	?	Other Database Import
A/NewYork/655/1994	flu	EPI36973	1994-11-17	north_america	usa	new_york	new_york	cell	?	?	?	Other Database Import
A/NewYork/657/1994	flu	EPI36441	1994-12-02	north_america	usa	new_york	new_york	cell	?	?	?	Other Database Import
A/NewYork/659/1994	flu	EPI34750	1994-12-08	north_america	usa	new_york	new_york	cell	?	?	?	Other Database Import
A/NewYork/688/1994	flu	EPI39061	1994-12-12	north_america	usa	new_york	new_york	cell	?	?	?	Other Database Import
A/NewYork/661/1994	flu	EPI36992	1994-12-15	north_america	usa	new_york	new_york	cell	?	?	?	Other Database Import
A/NewYork/665/1994	flu	EPI34788	1994-12-16	north_america	usa	new_york	new_york	cell	?	?	?	Other Database Import
A/NewYork/663/1994	flu	EPI37011	1994-12-20	north_america	usa	new_york	new_york	cell	?	?	?	Other Database Import
A/England/79/1994	flu	EPI115141	1994-12-21	europe	united_kingdom	england	england	cell	?	?	?	Other Database Import
A/NewYork/696/1994	flu	EPI34351	1994-12-30	north_america	usa	new_york	new_york	cell	?	?	?	Other Database Import
A/Jitie/1/1995	flu	EPI360594	1995-01-01	china	china	china	china	undetermined	?	?	?	Other Database Import
A/NewYork/691/1995	flu	EPI37125	1995-01-03	north_america	usa	new_york	new_york	cell	?	?	?	Other Database Import
A/NewYork/671/1995	flu	EPI34826	1995-01-06	north_america	usa	new_york	new_york	cell	?	?	?	Other Database Import
A/NewYork/667/1995	flu	EPI37068	1995-01-08	north_america	usa	new_york	new_york	cell	?	?	?	Other Database Import
A/NewYork/702/1995	flu	EPI34408	1995-01-09	north_america	usa	new_york	new_york	cell	?	?	?	Other Database Import
A/NewYork/662/1995	flu	EPI34769	1995-01-09	north_america	usa	new_york	new_york	cell	?	?	?	Other Database Import
A/NewYork/669/1995	flu	EPI34807	1995-01-11	north_america	usa	new_york	new_york	cell	?	?	?	Other Database Import
A/NewYork/670/1995	flu	EPI36460	1995-01-11	north_america	usa	new_york	new_york	cell	?	?	?	Other Database Import
A/England/286/1995	flu	EPI115157	1995-01-15	europe	united_kingdom	england	england	cell	?	?	?	Other Database Import
A/NewYork/672/1995	flu	EPI34845	1995-01-17	north_america	usa	new_york	new_york	cell	?	?	?	Other Database Import
A/NewYork/676/1995	flu	EPI39042	1995-01-18	north_america	usa	new_york	new_york	cell	?	?	?	Other Database Import
A/NewYork/692/1995	flu	EPI34313	1995-01-18	north_america	usa	new_york	new_york	cell	?	?	?	Other Database Import
A/NewYork/690/1995	flu	EPI38094	1995-01-18	north_america	usa	new_york	new_york	cell	?	?	?	Other Database Import
A/NewYork/674/1995	flu	EPI34864	1995-01-19	north_america	usa	new_york	new_york	cell	?	?	?	Other Database Import
A/NewYork/678/1995	flu	EPI37106	1995-01-20	north_america	usa	new_york	new_york	cell	?	?	?	Other Database Import
A/NewYork/673/1995	flu	EPI38037	1995-01-20	north_america	usa	new_york	new_york	cell	?	?	?	Other Database Import
A/NewYork/689/1995	flu	EPI35567	1995-01-22	north_america	usa	new_york	new_york	cell	?	?	?	Other Database Import
A/NewYork/684/1995	flu	EPI35510	1995-01-23	north_america	usa	new_york	new_york	cell	?	?	?	Other Database Import
A/England/54/1995	flu	EPI115159	1995-01-24	europe	united_kingdom	england	england	cell	?	?	?	Other Database Import
A/NewYork/703/1995	flu	EPI34427	1995-01-24	north_america	usa	new_york	new_york	cell	?	?	?	Other Database Import
A/NewYork/675/1995	flu	EPI36479	1995-01-24	north_america	usa	new_york	new_york	cell	?	?	?	Other Database Import
A/Siena/3/1995	flu	EPI176077	1995-01-27	europe	italy	tuscany	siena	undetermined	?	?	?	Other Database Import
A/NewYork/698/1995	flu	EPI34389	1995-01-31	north_america	usa	new_york	new_york	cell	?	?	?	Other Database Import
A/Geneva/A9509/1995	flu	EPI366929	1995-02-01	europe	switzerland	geneva	geneva	cell	?	?	?	Other Database Import
A/NewYork/686/1995	flu	EPI38075	1995-02-02	north_america	usa	new_york	new_york	cell	?	?	?	Other Database Import
A/England/121/1995	flu	EPI115143	1995-02-03	europe	united_kingdom	england	england	cell	?	?	?	Other Database Import
A/NewYork/687/1995	flu	EPI35548	1995-02-06	north_america	usa	new_york	new_york	cell	?	?	?	Other Database Import
A/NewYork/699/1995	flu	EPI38113	1995-02-07	north_america	usa	new_york	new_york	cell	?	?	?	Other Database Import
A/NewYork/666/1995	flu	EPI37049	1995-02-08	north_america	usa	new_york	new_york	cell	?	?	?	Other Database Import
A/NewYork/680/1995	flu	EPI48302	1995-02-08	north_america	usa	new_york	new_york	cell	?	?	?	Other Database Import
A/NewYork/685/1995	flu	EPI35529	1995-02-08	north_america	usa	new_york	new_york	cell	?	?	?	Other Database Import
A/NewYork/697/1995	flu	EPI34370	1995-02-10	north_america	usa	new_york	new_york	cell	?	?	?	Other Database Import
A/England/255/1995	flu	EPI115147	1995-02-11	europe	united_kingdom	england	england	cell	?	?	?	Other Database Import
A/NewYork/700/1995	flu	EPI37144	1995-02-14	north_america	usa	new_york	new_york	cell	?	?	?	Other Database Import
A/NewYork/677/1995	flu	EPI36498	1995-02-18	north_america	usa	new_york	new_york	cell	?	?	?	Other Database Import
A/NewYork/668/1995	flu	EPI37087	1995-02-18	north_america	usa	new_york	new_york	cell	?	?	?	Other Database Import
A/NewYork/681/1995	flu	EPI48321	1995-02-20	north_america	usa	new_york	new_york	cell	?	?	?	Other Database Import
A/England/178/1995	flu	EPI115145	1995-02-20	europe	united_kingdom	england	england	cell	?	?	?	Other Database Import
A/NewYork/658/1995	flu	EPI34731	1995-02-21	north_america	usa	new_york	new_york	cell	?	?	?	Other Database Import
A/NewYork/701/1995	flu	EPI48340	1995-02-23	north_america	usa	new_york	new_york	cell	?	?	?	Other Database Import
A/NewYork/682/1995	flu	EPI36517	1995-03-01	north_america	usa	new_york	new_york	cell	?	?	?	Other Database Import
A/NewYork/660/1995	flu	EPI39023	1995-03-02	north_america	usa	new_york	new_york	cell	?	?	?	Other Database Import
A/NewYork/695/1995	flu	EPI34332	1995-03-02	north_america	usa	new_york	new_york	cell	?	?	?	Other Database Import
A/NewYork/683/1995	flu	EPI38056	1995-03-03	north_america	usa	new_york	new_york	cell	?	?	?	Other Database Import
A/NewYork/679/1995	flu	EPI34883	1995-03-03	north_america	usa	new_york	new_york	cell	?	?	?	Other Database Import
A/NewYork/664/1995	flu	EPI37030	1995-03-13	north_america	usa	new_york	new_york	cell	?	?	?	Other Database Import
A/NewYork/693/1995	flu	EPI34902	1995-03-21	north_america	usa	new_york	new_york	cell	?	?	?	Other Database Import
A/England/258/1995	flu	EPI115149	1995-03-25	europe	united_kingdom	england	england	cell	?	?	?	Other Database Import
A/England/263/1995	flu	EPI115151	1995-03-31	europe	united_kingdom	england	england	cell	?	?	?	Other Database Import
A/Guangxi/42/1995	flu	EPI3863	1995-04-06	china	china	guangxi	guangxi	undetermined	?	?	?	Other Database Import
A/England/268/1995	flu	EPI115153	1995-04-12	europe	united_kingdom	england	england	cell	?	?	?	Other Database Import
A/England/282/1995	flu	EPI115155	1995-04-21	europe	united_kingdom	england	england	cell	?	?	?	Other Database Import
A/Malaysia/7145/1995	flu	EPI373079	1995-07-03	southeast_asia	malaysia	malaysia	malaysia	undetermined	?	?	?	Other Database Import
A/Victoria/75/1995	flu	EPI362814	1995-07-27	oceania	australia	victoria	victoria	cell	?	?	?	Other Database Import
A/Shanghai/11/1995	flu	EPI360607	1995-08-30	china	china	shanghai	shanghai	undetermined	?	?	?	Other Database Import
A/HongKong/49/1995	flu	EPI366945	1995-09-01	china	hong_kong	hong_kong	hong_kong	cell	?	?	?	Other Database Import
A/Malaysia/7832/1995	flu	EPI373095	1995-09-27	southeast_asia	malaysia	malaysia	malaysia	undetermined	?	?	?	Other Database Import
A/Malaysia/7831/1995	flu	EPI373087	1995-09-27	southeast_asia	malaysia	malaysia	malaysia	undetermined	?	?	?	Other Database Import
A/HongKong/55/1995	flu	EPI362788	1995-10-12	china	hong_kong	hong_kong	hong_kong	cell	?	?	?	Other Database Import
A/NewYork/606/1995	flu	EPI32729	1995-11-28	north_america	usa	new_york	new_york	cell	?	?	?	Other Database Import
A/Shanxi/2/1995	flu	EPI360600	1995-12-01	china	china	shanxi	shanxi	undetermined	?	?	?	Other Database Import
A/Shanxi/5/1995	flu	EPI360601	1995-12-01	china	china	shanxi	shanxi	undetermined	?	?	?	Other Database Import
A/Shanxi/28/1995	flu	EPI360602	1995-12-01	china	china	shanxi	shanxi	undetermined	?	?	?	Other Database Import
A/Netherlands/271/1995	flu	EPI362801	1995-12-02	europe	netherlands	netherlands	netherlands	cell	?	?	?	Other Database Import
A/NewYork/634/1995	flu	EPI32976	1995-12-08	north_america	usa	new_york	new_york	cell	?	?	?	Other Database Import
A/NewYork/628/1995	flu	EPI32938	1995-12-12	north_america	usa	new_york	new_york	cell	?	?	?	Other Database Import
A/NewYork/648/1995	flu	EPI33033	1995-12-14	north_america	usa	new_york	new_york	cell	?	?	?	Other Database Import
A/NewYork/609/1995	flu	EPI32767	1995-12-18	north_america	usa	new_york	new_york	cell	?	?	?	Other Database Import
A/NewYork/610/1995	flu	EPI32786	1995-12-18	north_america	usa	new_york	new_york	cell	?	?	?	Other Database Import
A/NewYork/639/1995	flu	EPI36422	1995-12-18	north_america	usa	new_york	new_york	cell	?	?	?	Other Database Import
A/NewYork/612/1995	flu	EPI32824	1995-12-19	north_america	usa	new_york	new_york	cell	?	?	?	Other Database Import
A/NewYork/647/1995	flu	EPI35472	1995-12-27	north_america	usa	new_york	new_york	cell	?	?	?	Other Database Import
A/NewYork/611/1995	flu	EPI32805	1995-12-28	north_america	usa	new_york	new_york	cell	?	?	?	Other Database Import
A/NewYork/618/1995	flu	EPI32862	1995-12-28	north_america	usa	new_york	new_york	cell	?	?	?	Other Database Import
A/NewYork/623/1995	flu	EPI33185	1995-12-29	north_america	usa	new_york	new_york	cell	?	?	?	Other Database Import
A/NewYork/641/1996	flu	EPI34655	1996-01-03	north_america	usa	new_york	new_york	cell	?	?	?	Other Database Import
A/Cnic/35/1996	flu	EPI3773	1996-01-04	china	china	china	cnic	undetermined	?	?	?	Other Database Import
A/Cnic/18/1996	flu	EPI360618	1996-01-04	china	china	china	cnic	undetermined	?	?	?	Other Database Import
A/NewYork/622/1996	flu	EPI32900	1996-01-08	north_america	usa	new_york	new_york	cell	?	?	?	Other Database Import
A/Shandong/7/1996	flu	EPI360636	1996-01-08	china	china	shandong	shandong	undetermined	?	?	?	Other Database Import
A/Shandong/22/1996	flu	EPI360638	1996-01-08	china	china	shandong	shandong	undetermined	?	?	?	Other Database Import
A/NewYork/613/1996	flu	EPI32843	1996-01-10	north_america	usa	new_york	new_york	cell	?	?	?	Other Database Import
A/NewYork/619/1996	flu	EPI32881	1996-01-10	north_america	usa	new_york	new_york	cell	?	?	?	Other Database Import
A/Guangxi/127/1996	flu	EPI360628	1996-01-13	china	china	guangxi	guangxi	undetermined	?	?	?	Other Database Import
A/Shandong/10/1996	flu	EPI360637	1996-01-14	china	china	shandong	shandong	undetermined	?	?	?	Other Database Import
A/NewYork/625/1996	flu	EPI32919	1996-01-15	north_america	usa	new_york	new_york	cell	?	?	?	Other Database Import
A/NewYork/637/1996	flu	EPI32995	1996-01-17	north_america	usa	new_york	new_york	cell	?	?	?	Other Database Import
A/NewYork/635/1996	flu	EPI34617	1996-01-18	north_america	usa	new_york	new_york	cell	?	?	?	Other Database Import
A/NewYork/636/1996	flu	EPI34636	1996-01-22	north_america	usa	new_york	new_york	cell	?	?	?	Other Database Import
A/Guangxi/125/1996	flu	EPI360627	1996-01-26	china	china	guangxi	guangxi	undetermined	?	?	?	Other Database Import
A/Guangxi/126/1996	flu	EPI360626	1996-01-26	china	china	guangxi	guangxi	undetermined	?	?	?	Other Database Import
A/Wuhan/30/1996	flu	EPI360649	1996-01-31	china	china	hubei	wuhan	undetermined	?	?	?	Other Database Import
A/Singapore/1/1996	flu	EPI362827	1996-02-12	southeast_asia	singapore	singapore	singapore	cell	?	?	?	Other Database Import
A/NewYork/624/1996	flu	EPI34579	1996-02-16	north_america	usa	new_york	new_york	cell	?	?	?	Other Database Import
A/NewYork/632/1996	flu	EPI34598	1996-03-01	north_america	usa	new_york	new_york	cell	?	?	?	Other Database Import
A/HongKong/42/1996	flu	EPI366985	1996-03-04	china	hong_kong	hong_kong	hong_kong	cell	?	?	?	Other Database Import
A/Shanghai/5/1996	flu	EPI360639	1996-03-15	china	china	shanghai	shanghai	undetermined	?	?	?	Other Database Import
A/NewYork/617/1996	flu	EPI32482	1996-03-19	north_america	usa	new_york	new_york	cell	?	?	?	Other Database Import
A/NewYork/652/1996	flu	EPI35491	1996-04-01	north_america	usa	new_york	new_york	cell	?	?	?	Other Database Import
A/NewYork/608/1996	flu	EPI32748	1996-04-01	north_america	usa	new_york	new_york	cell	?	?	?	Other Database Import
A/NewYork/631/1996	flu	EPI32957	1996-04-04	north_america	usa	new_york	new_york	cell	?	?	?	Other Database Import
A/Guangxi/9/1996	flu	EPI360625	1996-04-05	china	china	guangxi	guangxi	undetermined	?	?	?	Other Database Import
A/Guangzhou/9/1996	flu	EPI360629	1996-04-08	china	china	guangdong	guangzhou	undetermined	?	?	?	Other Database Import
A/Shanghai/9/1996	flu	EPI360640	1996-04-19	china	china	shanghai	shanghai	undetermined	?	?	?	Other Database Import
A/Shanghai/12/1996	flu	EPI360641	1996-04-22	china	china	shanghai	shanghai	undetermined	?	?	?	Other Database Import
A/Fujian/126/1996	flu	EPI360620	1996-05-01	china	china	fujian	fujian	undetermined	?	?	?	Other Database Import
A/Shenzhen/106/1996	flu	EPI360645	1996-05-12	china	china	guangdong	shenzhen	undetermined	?	?	?	Other Database Import
A/Fujian/152/1996	flu	EPI360622	1996-05-20	china	china	fujian	fujian	undetermined	?	?	?	Other Database Import
A/Malaysia/10081/1996	flu	EPI371719	1996-05-24	southeast_asia	malaysia	malaysia	malaysia	undetermined	?	?	?	Other Database Import
A/Hainan/1/1996	flu	EPI360633	1996-05-27	china	china	hainan	hainan	undetermined	?	?	?	Other Database Import
A/Hainan/3/1996	flu	EPI360632	1996-05-27	china	china	hainan	hainan	undetermined	?	?	?	Other Database Import
A/Hainan/7/1996	flu	EPI360634	1996-05-27	china	china	hainan	hainan	undetermined	?	?	?	Other Database Import
A/Hainan/9/1996	flu	EPI360635	1996-05-27	china	china	hainan	hainan	undetermined	?	?	?	Other Database Import
A/Malaysia/10135/1996	flu	EPI371726	1996-05-30	southeast_asia	malaysia	malaysia	malaysia	undetermined	?	?	?	Other Database Import
A/Guangzhou/44/1996	flu	EPI360612	1996-06-09	china	china	guangdong	guangzhou	undetermined	?	?	?	Other Database Import
A/Malaysia/10111/1996	flu	EPI373103	1996-06-19	southeast_asia	malaysia	malaysia	malaysia	undetermined	?	?	?	Other Database Import
A/Malaysia/10360/1996	flu	EPI373111	1996-07-02	southeast_asia	malaysia	malaysia	malaysia	undetermined	?	?	?	Other Database Import
A/Fujian/202/1996	flu	EPI360621	1996-07-02	china	china	fujian	fujian	undetermined	?	?	?	Other Database Import
A/Malaysia/10370/1996	flu	EPI373119	1996-07-03	southeast_asia	malaysia	malaysia	malaysia	undetermined	?	?	?	Other Database Import
A/Wuhan/260/1996	flu	EPI360646	1996-07-17	china	china	hubei	wuhan	undetermined	?	?	?	Other Database Import
A/HongKong/357/1996	flu	EPI366993	1996-07-19	china	hong_kong	hong_kong	hong_kong	cell	?	?	?	Other Database Import
A/HongKong/358/1996	flu	EPI367001	1996-07-19	china	hong_kong	hong_kong	hong_kong	cell	?	?	?	Other Database Import
A/Shanghai/15/1996	flu	EPI360642	1996-07-25	china	china	shanghai	shanghai	undetermined	?	?	?	Other Database Import
A/Malaysia/10675/1996	flu	EPI371733	1996-08-26	southeast_asia	malaysia	malaysia	malaysia	undetermined	?	?	?	Other Database Import
A/Malaysia/10717/1996	flu	EPI373135	1996-09-02	southeast_asia	malaysia	malaysia	malaysia	undetermined	?	?	?	Other Database Import
A/Malaysia/10807/1996	flu	EPI373127	1996-09-13	southeast_asia	malaysia	malaysia	malaysia	undetermined	?	?	?	Other Database Import
A/Malaysia/10816/1996	flu	EPI371737	1996-09-16	southeast_asia	malaysia	malaysia	malaysia	undetermined	?	?	?	Other Database Import
A/Malaysia/10879/1996	flu	EPI371743	1996-09-25	southeast_asia	malaysia	malaysia	malaysia	undetermined	?	?	?	Other Database Import
A/Malaysia/10877/1996	flu	EPI373143	1996-09-25	southeast_asia	malaysia	malaysia	malaysia	undetermined	?	?	?	Other Database Import
A/HongKong/434/1996	flu	EPI367009	1996-10-02	china	hong_kong	hong_kong	hong_kong	cell	?	?	?	Other Database Import
A/Malaysia/10970/1996	flu	EPI371750	1996-10-14	southeast_asia	malaysia	malaysia	malaysia	undetermined	?	?	?	Other Database Import
A/Malaysia/10969/1996	flu	EPI373151	1996-10-14	southeast_asia	malaysia	malaysia	malaysia	undetermined	?	?	?	Other Database Import
A/Malaysia/10997/1996	flu	EPI373159	1996-10-18	southeast_asia	malaysia	malaysia	malaysia	undetermined	?	?	?	Other Database Import
A/Lyon/1781/1996	flu	EPI367017	1996-10-26	europe	france	auvergne_rhone_alpes	lyon	cell	?	?	?	Other Database Import
A/NewYork/563/1996	flu	EPI31266	1996-11-12	north_america	usa	new_york	new_york	cell	?	?	?	Other Database Import
A/NewYork/554/1996	flu	EPI37923	1996-11-12	north_america	usa	new_york	new_york	cell	?	?	?	Other Database Import
A/NewYork/587/1996	flu	EPI30582	1996-11-18	north_america	usa	new_york	new_york	cell	?	?	?	Other Database Import
A/NewYork/594/1996	flu	EPI31361	1996-11-18	north_america	usa	new_york	new_york	cell	?	?	?	Other Database Import
A/NewYork/556/1996	flu	EPI36384	1996-11-19	north_america	usa	new_york	new_york	cell	?	?	?	Other Database Import
A/NewYork/557/1996	flu	EPI34161	1996-11-21	north_america	usa	new_york	new_york	cell	?	?	?	Other Database Import
A/NewYork/559/1996	flu	EPI34180	1996-11-25	north_america	usa	new_york	new_york	cell	?	?	?	Other Database Import
A/NewYork/565/1996	flu	EPI30013	1996-12-02	north_america	usa	new_york	new_york	cell	?	?	?	Other Database Import
A/NewYork/582/1996	flu	EPI31304	1996-12-02	north_america	usa	new_york	new_york	cell	?	?	?	Other Database Import
A/NewYork/592/1996	flu	EPI31342	1996-12-04	north_america	usa	new_york	new_york	cell	?	?	?	Other Database Import
A/NewYork/580/1996	flu	EPI30506	1996-12-05	north_america	usa	new_york	new_york	cell	?	?	?	Other Database Import
A/NewYork/567/1996	flu	EPI31285	1996-12-05	north_america	usa	new_york	new_york	cell	?	?	?	Other Database Import
A/Scotland/38/1996	flu	EPI314865	1996-12-06	europe	united_kingdom	scotland	scotland	undetermined	?	?	?	Other Database Import
A/NewYork/593/1996	flu	EPI31038	1996-12-09	north_america	usa	new_york	new_york	cell	?	?	?	Other Database Import
A/NewYork/603/1996	flu	EPI32710	1996-12-09	north_america	usa	new_york	new_york	cell	?	?	?	Other Database Import
A/NewYork/601/1996	flu	EPI44157	1996-12-09	north_america	usa	new_york	new_york	cell	?	?	?	Other Database Import
A/NewYork/590/1996	flu	EPI30639	1996-12-10	north_america	usa	new_york	new_york	cell	?	?	?	Other Database Import
A/NewYork/568/1996	flu	EPI30449	1996-12-11	north_america	usa	new_york	new_york	cell	?	?	?	Other Database Import
A/NewYork/596/1996	flu	EPI31399	1996-12-12	north_america	usa	new_york	new_york	cell	?	?	?	Other Database Import
A/NewYork/572/1996	flu	EPI32653	1996-12-12	north_america	usa	new_york	new_york	cell	?	?	?	Other Database Import
A/NewYork/570/1996	flu	EPI30051	1996-12-12	north_america	usa	new_york	new_york	cell	?	?	?	Other Database Import
A/NewYork/574/1996	flu	EPI30468	1996-12-12	north_america	usa	new_york	new_york	cell	?	?	?	Other Database Import
A/NewYork/562/1996	flu	EPI31247	1996-12-13	north_america	usa	new_york	new_york	cell	?	?	?	Other Database Import
A/NewYork/599/1996	flu	EPI33876	1996-12-16	north_america	usa	new_york	new_york	cell	?	?	?	Other Database Import
A/Beijing/233/1996	flu	EPI360613	1996-12-17	china	china	beijing	beijing	undetermined	?	?	?	Other Database Import
A/NewYork/598/1996	flu	EPI36403	1996-12-17	north_america	usa	new_york	new_york	cell	?	?	?	Other Database Import
A/NewYork/575/1996	flu	EPI30089	1996-12-17	north_america	usa	new_york	new_york	cell	?	?	?	Other Database Import
A/NewYork/589/1996	flu	EPI30620	1996-12-18	north_america	usa	new_york	new_york	cell	?	?	?	Other Database Import
A/NewYork/571/1996	flu	EPI34541	1996-12-18	north_america	usa	new_york	new_york	cell	?	?	?	Other Database Import
A/NewYork/595/1996	flu	EPI31380	1996-12-18	north_america	usa	new_york	new_york	cell	?	?	?	Other Database Import
A/NewYork/591/1996	flu	EPI31323	1996-12-20	north_america	usa	new_york	new_york	cell	?	?	?	Other Database Import
A/NewYork/586/1996	flu	EPI30563	1996-12-21	north_america	usa	new_york	new_york	cell	?	?	?	Other Database Import
A/NewYork/561/1996	flu	EPI32691	1996-12-22	north_america	usa	new_york	new_york	cell	?	?	?	Other Database Import
A/NewYork/555/1996	flu	EPI33147	1996-12-23	north_america	usa	new_york	new_york	cell	?	?	?	Other Database Import
A/Beijing/259/1996	flu	EPI360616	1996-12-23	china	china	beijing	beijing	undetermined	?	?	?	Other Database Import
A/NewYork/573/1996	flu	EPI30070	1996-12-23	north_america	usa	new_york	new_york	cell	?	?	?	Other Database Import
A/NewYork/602/1996	flu	EPI33895	1996-12-23	north_america	usa	new_york	new_york	cell	?	?	?	Other Database Import
A/NewYork/600/1996	flu	EPI31418	1996-12-23	north_america	usa	new_york	new_york	cell	?	?	?	Other Database Import
A/Malaysia/11473/1996	flu	EPI373167	1996-12-24	southeast_asia	malaysia	malaysia	malaysia	undetermined	?	?	?	Other Database Import
A/NewYork/577/1996	flu	EPI34560	1996-12-24	north_america	usa	new_york	new_york	cell	?	?	?	Other Database Import
A/NewYork/578/1996	flu	EPI32672	1996-12-27	north_america	usa	new_york	new_york	cell	?	?	?	Other Database Import
A/NewYork/588/1996	flu	EPI30601	1996-12-28	north_america	usa	new_york	new_york	cell	?	?	?	Other Database Import
A/Nice/491/1997	flu	EPI362882	1996-12-30	europe	france	provence_alpes_cote_d_azur	nice	cell	?	?	?	Other Database Import
A/NewYork/584/1996	flu	EPI31019	1996-12-31	north_america	usa	new_york	new_york	cell	?	?	?	Other Database Import
A/Tianjin/64/1997	flu	EPI360664	1997-01-01	china	china	tianjin	tianjin	undetermined	?	?	?	Other Database Import
A/NewYork/564/1997	flu	EPI29994	1997-01-02	north_america	usa	new_york	new_york	cell	?	?	?	Other Database Import
A/NewYork/579/1997	flu	EPI30108	1997-01-02	north_america	usa	new_york	new_york	cell	?	?	?	Other Database Import
A/Scotland/39/1997	flu	EPI314868	1997-01-03	europe	united_kingdom	scotland	scotland	undetermined	?	?	?	Other Database Import
A/NewYork/569/1997	flu	EPI30032	1997-01-03	north_america	usa	new_york	new_york	cell	?	?	?	Other Database Import
A/NewYork/560/1997	flu	EPI29975	1997-01-06	north_america	usa	new_york	new_york	cell	88y	male	?	Other Database Import
A/Harbin/2/1997	flu	EPI360667	1997-01-06	china	china	heilongjiang	harbin	undetermined	?	?	?	Other Database Import
A/NewYork/576/1997	flu	EPI30487	1997-01-06	north_america	usa	new_york	new_york	cell	?	?	?	Other Database Import
A/Siena/1/1997	flu	EPI171181	1997-01-06	europe	italy	tuscany	siena	undetermined	?	?	?	Other Database Import
A/NewYork/558/1997	flu	EPI30411	1997-01-06	north_america	usa	new_york	new_york	cell	?	?	?	Other Database Import
A/NewYork/597/1997	flu	EPI30658	1997-01-06	north_america	usa	new_york	new_york	cell	?	?	?	Other Database Import
A/Harbin/1/1997	flu	EPI360660	1997-01-07	china	china	heilongjiang	harbin	undetermined	?	?	?	Other Database Import
A/Tianjin/46/1997	flu	EPI360665	1997-01-07	china	china	tianjin	tianjin	undetermined	?	?	?	Other Database Import
A/Scotland/31/1997	flu	EPI314871	1997-01-12	europe	united_kingdom	scotland	scotland	undetermined	?	?	?	Other Database Import
A/Beijing/62/1997	flu	EPI6284	1997-01-15	china	china	beijing	beijing	undetermined	?	?	?	Other Database Import
A/Beijing/65/1997	flu	EPI360654	1997-01-15	china	china	beijing	beijing	undetermined	?	?	?	Other Database Import
A/NewYork/566/1997	flu	EPI30430	1997-01-17	north_america	usa	new_york	new_york	cell	?	?	?	Other Database Import
A/NewYork/581/1997	flu	EPI30525	1997-01-17	north_america	usa	new_york	new_york	cell	?	?	?	Other Database Import
A/NewYork/585/1997	flu	EPI30544	1997-01-22	north_america	usa	new_york	new_york	cell	?	?	?	Other Database Import
A/NewYork/583/1997	flu	EPI30127	1997-03-01	north_america	usa	new_york	new_york	cell	?	?	?	Other Database Import
A/HongKong/CUHK4147/1997	flu	EPI161141	1997-03-10	china	hong_kong	hong_kong	hong_kong	undetermined	?	?	?	Other Database Import
A/Malaysia/12106/1997	flu	EPI373743	1997-03-14	southeast_asia	malaysia	malaysia	malaysia	undetermined	?	?	?	Other Database Import
A/HongKong/CUHK4245/1997	flu	EPI161145	1997-03-14	china	hong_kong	hong_kong	hong_kong	undetermined	?	?	?	Other Database Import
A/Malaysia/12132/1997	flu	EPI373175	1997-03-18	southeast_asia	malaysia	malaysia	malaysia	undetermined	?	?	?	Other Database Import
A/HongKong/CUHK4391/1997	flu	EPI161149	1997-03-22	china	hong_kong	hong_kong	hong_kong	undetermined	?	?	?	Other Database Import
A/HongKong/CUHK4542/1997	flu	EPI161152	1997-04-02	china	hong_kong	hong_kong	hong_kong	undetermined	?	?	?	Other Database Import
A/HongKong/CUHK4529/1997	flu	EPI161151	1997-04-02	china	hong_kong	hong_kong	hong_kong	undetermined	?	?	?	Other Database Import
A/HongKong/CUHK4622/1997	flu	EPI161153	1997-04-08	china	hong_kong	hong_kong	hong_kong	undetermined	?	?	?	Other Database Import
A/HongKong/CUHK4803/1997	flu	EPI161154	1997-04-17	china	hong_kong	hong_kong	hong_kong	undetermined	?	?	?	Other Database Import
A/HongKong/CUHK12160/1997	flu	EPI160976	1997-05-10	china	hong_kong	hong_kong	hong_kong	undetermined	?	?	?	Other Database Import
A/Malaysia/12550/1997	flu	EPI373183	1997-05-10	southeast_asia	malaysia	malaysia	malaysia	undetermined	?	?	?	Other Database Import
A/HongKong/CUHK12566/1997	flu	EPI160983	1997-06-02	china	hong_kong	hong_kong	hong_kong	undetermined	?	?	?	Other Database Import
A/Malaysia/12726/1997	flu	EPI373191	1997-06-02	southeast_asia	malaysia	malaysia	malaysia	undetermined	?	?	?	Other Database Import
A/HongKong/CUHK12563/1997	flu	EPI160982	1997-06-02	china	hong_kong	hong_kong	hong_kong	undetermined	?	?	?	Other Database Import
A/HongKong/CUHK12626/1997	flu	EPI160986	1997-06-03	china	hong_kong	hong_kong	hong_kong	undetermined	?	?	?	Other Database Import
A/Malaysia/12766/1997	flu	EPI373199	1997-06-06	southeast_asia	malaysia	malaysia	malaysia	undetermined	?	?	?	Other Database Import
A/HongKong/CUHK12794/1997	flu	EPI160987	1997-06-11	china	hong_kong	hong_kong	hong_kong	undetermined	?	?	?	Other Database Import
A/Guangxi/341/1997	flu	EPI360658	1997-06-15	china	china	guangxi	guangxi	undetermined	?	?	?	Other Database Import
A/Malaysia/12904/1997	flu	EPI373207	1997-06-17	southeast_asia	malaysia	malaysia	malaysia	undetermined	?	?	?	Other Database Import
A/HongKong/CUHK20010/1997	flu	EPI161025	1997-06-19	china	hong_kong	hong_kong	hong_kong	undetermined	?	?	?	Other Database Import
A/Malaysia/12942/1997	flu	EPI373215	1997-06-20	southeast_asia	malaysia	malaysia	malaysia	undetermined	?	?	?	Other Database Import
A/Malaysia/12974/1997	flu	EPI373223	1997-06-24	southeast_asia	malaysia	malaysia	malaysia	undetermined	?	?	?	Other Database Import
A/Malaysia/12990/1997	flu	EPI373231	1997-06-24	southeast_asia	malaysia	malaysia	malaysia	undetermined	?	?	?	Other Database Import
A/Malaysia/13002/1997	flu	EPI373239	1997-06-27	southeast_asia	malaysia	malaysia	malaysia	undetermined	?	?	?	Other Database Import
A/HongKong/CUHK20199/1997	flu	EPI161028	1997-07-03	china	hong_kong	hong_kong	hong_kong	undetermined	?	?	?	Other Database Import
A/HongKong/CUHK20217/1997	flu	EPI161031	1997-07-03	china	hong_kong	hong_kong	hong_kong	undetermined	?	?	?	Other Database Import
A/HongKong/CUHK20236/1997	flu	EPI161032	1997-07-03	china	hong_kong	hong_kong	hong_kong	undetermined	?	?	?	Other Database Import
A/HongKong/CUHK20213/1997	flu	EPI161030	1997-07-03	china	hong_kong	hong_kong	hong_kong	undetermined	?	?	?	Other Database Import
A/Guangxi/386/1997	flu	EPI360657	1997-07-06	china	china	guangxi	guangxi	undetermined	?	?	?	Other Database Import
A/Malaysia/13094/1997	flu	EPI373247	1997-07-07	southeast_asia	malaysia	malaysia	malaysia	undetermined	?	?	?	Other Database Import
A/HongKong/CUHK20320/1997	flu	EPI161036	1997-07-07	china	hong_kong	hong_kong	hong_kong	undetermined	?	?	?	Other Database Import
A/HongKong/CUHK20523/1997	flu	EPI161037	1997-07-21	china	hong_kong	hong_kong	hong_kong	undetermined	?	?	?	Other Database Import
A/Malaysia/13241/1997	flu	EPI371843	1997-07-24	southeast_asia	malaysia	malaysia	malaysia	undetermined	?	?	?	Other Database Import
A/Malaysia/13246/1997	flu	EPI373255	1997-07-24	southeast_asia	malaysia	malaysia	malaysia	undetermined	?	?	?	Other Database Import
A/HongKong/CUHK20731/1997	flu	EPI161038	1997-07-30	china	hong_kong	hong_kong	hong_kong	undetermined	?	?	?	Other Database Import
A/Taiwan/1335/1997	flu	EPI444652	1997-08-01	china	taiwan	taiwan	taiwan	cell	?	?	?	Other Database Import
A/Auckland/10/1997	flu	EPI367033	1997-08-01	oceania	new_zealand	auckland	auckland	cell	?	?	?	Other Database Import
A/Malaysia/13328/1997	flu	EPI371850	1997-08-02	southeast_asia	malaysia	malaysia	malaysia	undetermined	?	?	?	Other Database Import
A/Malaysia/13329/1997	flu	EPI371856	1997-08-02	southeast_asia	malaysia	malaysia	malaysia	undetermined	?	?	?	Other Database Import
A/Malaysia/13381/1997	flu	EPI371879	1997-08-06	southeast_asia	malaysia	malaysia	malaysia	undetermined	?	?	?	Other Database Import
A/Sichuan/304/1997	flu	EPI360663	1997-08-12	china	china	sichuan	sichuan	undetermined	?	?	?	Other Database Import
A/HongKong/CUHK20992/1997	flu	EPI161039	1997-08-13	china	hong_kong	hong_kong	hong_kong	undetermined	?	?	?	Other Database Import
A/HongKong/CUHK22013/1997	flu	EPI161057	1997-08-14	china	hong_kong	hong_kong	hong_kong	undetermined	?	?	?	Other Database Import
A/HongKong/CUHK22048/1997	flu	EPI161058	1997-08-19	china	hong_kong	hong_kong	hong_kong	undetermined	?	?	?	Other Database Import
A/HongKong/CUHK22185/1997	flu	EPI161064	1997-08-23	china	hong_kong	hong_kong	hong_kong	undetermined	?	?	?	Other Database Import
A/HongKong/CUHK22736/1997	flu	EPI161068	1997-09-12	china	hong_kong	hong_kong	hong_kong	undetermined	?	?	?	Other Database Import
A/England/731/1997	flu	EPI115139	1997-11-26	europe	united_kingdom	england	england	undetermined	?	?	?	Other Database Import
A/NewYork/501/1997	flu	EPI91352	1997-11-26	north_america	usa	new_york	new_york	cell	?	?	?	Other Database Import
A/NewYork/503/1997	flu	EPI90839	1997-11-29	north_america	usa	new_york	new_york	cell	?	?	?	Other Database Import
A/NewYork/505/1997	flu	EPI90858	1997-12-02	north_america	usa	new_york	new_york	cell	?	?	?	Other Database Import
A/Malaysia/14590/1997	flu	EPI371863	1997-12-06	southeast_asia	malaysia	malaysia	malaysia	undetermined	?	?	?	Other Database Import
A/NewYork/511/1997	flu	EPI90915	1997-12-17	north_america	usa	new_york	new_york	cell	?	?	?	Other Database Import
A/NewYork/507/1997	flu	EPI28740	1997-12-17	north_america	usa	new_york	new_york	cell	?	?	?	Other Database Import
A/NewYork/515/1997	flu	EPI90953	1997-12-21	north_america	usa	new_york	new_york	cell	?	?	?	Other Database Import
A/NewYork/508/1997	flu	EPI90877	1997-12-22	north_america	usa	new_york	new_york	cell	?	?	?	Other Database Import
A/Netherlands/300/1997	flu	EPI367041	1997-12-23	europe	netherlands	netherlands	netherlands	cell	?	?	?	Other Database Import
A/NewYork/509/1997	flu	EPI91371	1997-12-23	north_america	usa	new_york	new_york	cell	?	?	?	Other Database Import
A/HongKong/CUHK41114/1997	flu	EPI161138	1997-12-23	china	hong_kong	hong_kong	hong_kong	undetermined	?	?	?	Other Database Import
A/NewYork/513/1997	flu	EPI90934	1997-12-24	north_america	usa	new_york	new_york	cell	?	?	?	Other Database Import
A/HongKong/CUHK41222/1997	flu	EPI161139	1997-12-25	china	hong_kong	hong_kong	hong_kong	undetermined	?	?	?	Other Database Import
A/NewYork/516/1997	flu	EPI91409	1997-12-26	north_america	usa	new_york	new_york	cell	?	?	?	Other Database Import
A/NewYork/545/1997	flu	EPI91751	1997-12-26	north_america	usa	new_york	new_york	cell	?	?	?	Other Database Import
A/NewYork/547/1997	flu	EPI91789	1997-12-28	north_america	usa	new_york	new_york	cell	?	?	?	Other Database Import
A/HongKong/CUHK41459/1997	flu	EPI161140	1997-12-28	china	hong_kong	hong_kong	hong_kong	undetermined	?	?	?	Other Database Import
A/HongKong/CUHK41507/1997	flu	EPI161142	1997-12-29	china	hong_kong	hong_kong	hong_kong	undetermined	?	?	?	Other Database Import
A/NewYork/526/1997	flu	EPI94962	1997-12-29	north_america	usa	new_york	new_york	cell	?	?	?	Other Database Import
A/Scotland/89/1997	flu	EPI314877	1997-12-30	europe	united_kingdom	scotland	scotland	undetermined	?	?	?	Other Database Import
A/HongKong/CUHK41757/1997	flu	EPI161143	1997-12-30	china	hong_kong	hong_kong	hong_kong	undetermined	?	?	?	Other Database Import
A/NewYork/524/1997	flu	EPI91542	1997-12-31	north_america	usa	new_york	new_york	cell	?	?	?	Other Database Import
A/NewYork/522/1997	flu	EPI91504	1997-12-31	north_america	usa	new_york	new_york	cell	?	?	?	Other Database Import
A/NewYork/504/1998	flu	EPI28721	1998-01-01	north_america	usa	new_york	new_york	cell	?	?	?	Other Database Import
A/NewYork/517/1998	flu	EPI90972	1998-01-03	north_america	usa	new_york	new_york	cell	21y	?	?	Other Database Import
A/HongKong/CUHK10186/1998	flu	EPI160956	1998-01-04	china	hong_kong	hong_kong	hong_kong	undetermined	?	?	?	Other Database Import
A/NewYork/518/1998	flu	EPI91428	1998-01-05	north_america	usa	new_york	new_york	cell	?	?	?	Other Database Import
A/HongKong/CUHK10216/1998	flu	EPI160957	1998-01-05	china	hong_kong	hong_kong	hong_kong	undetermined	?	?	?	Other Database Import
A/NewYork/520/1998	flu	EPI91466	1998-01-05	north_america	usa	new_york	new_york	cell	?	?	?	Other Database Import
A/HongKong/CUHK10276/1998	flu	EPI160958	1998-01-05	china	hong_kong	hong_kong	hong_kong	undetermined	?	?	?	Other Database Import
A/NewYork/528/1998	flu	EPI91580	1998-01-08	north_america	usa	new_york	new_york	cell	?	?	?	Other Database Import
A/HongKong/CUHK10537/1998	flu	EPI160960	1998-01-12	china	hong_kong	hong_kong	hong_kong	undetermined	?	?	?	Other Database Import
A/HongKong/CUHK10554/1998	flu	EPI160961	1998-01-13	china	hong_kong	hong_kong	hong_kong	undetermined	?	?	?	Other Database Import
A/NewYork/514/1998	flu	EPI28759	1998-01-13	north_america	usa	new_york	new_york	cell	?	?	?	Other Database Import
A/HongKong/CUHK10632/1998	flu	EPI160963	1998-01-14	china	hong_kong	hong_kong	hong_kong	undetermined	?	?	?	Other Database Import
A/Netherlands/5/1998	flu	EPI367214	1998-01-14	europe	netherlands	netherlands	netherlands	cell	?	?	?	Other Database Import
A/HongKong/CUHK10660/1998	flu	EPI160964	1998-01-16	china	hong_kong	hong_kong	hong_kong	undetermined	?	?	?	Other Database Import
A/NewYork/532/1998	flu	EPI91618	1998-01-18	north_america	usa	new_york	new_york	cell	?	?	?	Other Database Import
A/NewYork/521/1998	flu	EPI91485	1998-01-19	north_america	usa	new_york	new_york	cell	?	?	?	Other Database Import
A/NewYork/530/1998	flu	EPI28797	1998-01-19	north_america	usa	new_york	new_york	cell	?	?	?	Other Database Import
A/NewYork/549/1998	flu	EPI28835	1998-01-19	north_america	usa	new_york	new_york	cell	?	?	?	Other Database Import
A/HongKong/CUHK10756/1998	flu	EPI160965	1998-01-20	china	hong_kong	hong_kong	hong_kong	undetermined	?	?	?	Other Database Import
A/Shanghai/1/1998	flu	EPI360709	1998-01-25	china	china	shanghai	shanghai	undetermined	?	?	?	Other Database Import
A/NewYork/550/1998	flu	EPI28854	1998-01-25	north_america	usa	new_york	new_york	cell	?	?	?	Other Database Import
A/NewYork/546/1998	flu	EPI91770	1998-01-26	north_america	usa	new_york	new_york	cell	?	?	?	Other Database Import
A/HongKong/CUHK10954/1998	flu	EPI160966	1998-01-28	china	hong_kong	hong_kong	hong_kong	undetermined	?	?	?	Other Database Import
A/NewYork/512/1998	flu	EPI91390	1998-01-29	north_america	usa	new_york	new_york	cell	?	?	?	Other Database Import
A/NewYork/534/1998	flu	EPI91656	1998-01-29	north_america	usa	new_york	new_york	cell	?	?	?	Other Database Import
A/HongKong/CUHK10958/1998	flu	EPI160967	1998-01-29	china	hong_kong	hong_kong	hong_kong	undetermined	?	?	?	Other Database Import
A/HongKong/CUHK10960/1998	flu	EPI160968	1998-01-29	china	hong_kong	hong_kong	hong_kong	undetermined	?	?	?	Other Database Import
A/Wuhan/34/1998	flu	EPI360706	1998-02-01	china	china	hubei	wuhan	undetermined	?	?	?	Other Database Import
A/NewYork/533/1998	flu	EPI91637	1998-02-01	north_america	usa	new_york	new_york	cell	?	?	?	Other Database Import
A/NewYork/523/1998	flu	EPI91523	1998-02-02	north_america	usa	new_york	new_york	cell	?	?	?	Other Database Import
A/NewYork/506/1998	flu	EPI92131	1998-02-02	north_america	usa	new_york	new_york	cell	?	?	?	Other Database Import
A/NewYork/544/1998	flu	EPI96257	1998-02-02	north_america	usa	new_york	new_york	cell	?	?	?	Other Database Import
A/NewYork/536/1998	flu	EPI31228	1998-02-03	north_america	usa	new_york	new_york	cell	?	?	?	Other Database Import
A/NewYork/537/1998	flu	EPI184994	1998-02-05	north_america	usa	new_york	new_york	cell	?	?		Import from public-domain
A/NewYork/537/1998	flu	EPI184993	1998-02-05	north_america	usa	new_york	new_york	cell	?	?	?	Other Database Import
A/NewYork/538/1998	flu	EPI92169	1998-02-08	north_america	usa	new_york	new_york	cell	?	?	?	Other Database Import
A/NewYork/539/1998	flu	EPI91675	1998-02-10	north_america	usa	new_york	new_york	cell	?	?	?	Other Database Import
A/NewYork/548/1998	flu	EPI91808	1998-02-12	north_america	usa	new_york	new_york	cell	?	?	?	Other Database Import
A/NewYork/519/1998	flu	EPI91447	1998-02-13	north_america	usa	new_york	new_york	cell	?	?	?	Other Database Import
A/NewYork/540/1998	flu	EPI28816	1998-02-15	north_america	usa	new_york	new_york	cell	?	?	?	Other Database Import
A/NewYork/543/1998	flu	EPI91732	1998-02-17	north_america	usa	new_york	new_york	cell	?	?	?	Other Database Import
A/NewYork/542/1998	flu	EPI91713	1998-02-19	north_america	usa	new_york	new_york	cell	?	?	?	Other Database Import
A/NewYork/510/1998	flu	EPI90896	1998-02-20	north_america	usa	new_york	new_york	cell	?	?	?	Other Database Import
A/Shanghai/34/1998	flu	EPI360696	1998-02-20	china	china	shanghai	shanghai	undetermined	?	?	?	Other Database Import
A/NewYork/531/1998	flu	EPI91599	1998-02-22	north_america	usa	new_york	new_york	cell	?	?	?	Other Database Import
A/NewYork/529/1998	flu	EPI28778	1998-02-28	north_america	usa	new_york	new_york	cell	?	?	?	Other Database Import
A/NewYork/525/1998	flu	EPI91561	1998-03-03	north_america	usa	new_york	new_york	cell	?	?	?	Other Database Import
A/NewYork/535/1998	flu	EPI92093	1998-03-05	north_america	usa	new_york	new_york	cell	?	?	?	Other Database Import
A/Shanghai/69/1998	flu	EPI360694	1998-03-06	china	china	shanghai	shanghai	undetermined	?	?	?	Other Database Import
A/Shanghai/58/1998	flu	EPI360695	1998-03-06	china	china	shanghai	shanghai	undetermined	?	?	?	Other Database Import
A/Guangzhou/118/1998	flu	EPI360682	1998-03-09	china	china	guangdong	guangzhou	undetermined	?	?	?	Other Database Import
A/NewYork/541/1998	flu	EPI91694	1998-03-12	north_america	usa	new_york	new_york	cell	?	?	?	Other Database Import
A/NewYork/527/1998	flu	EPI92150	1998-03-15	north_america	usa	new_york	new_york	cell	?	?	?	Other Database Import
A/Guizhou/75/1998	flu	EPI360687	1998-03-18	china	china	guizhou	guizhou	undetermined	?	?	?	Other Database Import
A/Wuhan/133/1998	flu	EPI360705	1998-03-19	china	china	hubei	wuhan	undetermined	?	?	?	Other Database Import
A/NewYork/502/1998	flu	EPI95440	1998-03-20	north_america	usa	new_york	new_york	cell	?	?	?	Other Database Import
A/SouthAustralia/6/1998	flu	EPI116893	1998-03-30	oceania	australia	south_australia	south_australia	cell	?	?	?	Other Database Import
A/Hangzhou/16/1998	flu	EPI360689	1998-04-03	china	china	zhejiang	hangzhou	undetermined	?	?	?	Other Database Import
A/Sichuan/137/1998	flu	EPI360701	1998-04-03	china	china	sichuan	sichuan	undetermined	?	?	?	Other Database Import
A/Zhejiang/11/1998	flu	EPI360708	1998-05-13	china	china	zhejiang	zhejiang	undetermined	?	?	?	Other Database Import
A/SouthAfrica/56/1998	flu	EPI115325	1998-05-13	africa	south_africa	south_africa	south_africa	cell	?	?	?	Other Database Import
A/Fujian/221/1998	flu	EPI360675	1998-05-18	china	china	fujian	fujian	undetermined	?	?	?	Other Database Import
A/Guangzhou/er149/1998	flu	EPI360680	1998-05-23	china	china	guangdong	guangzhou	undetermined	?	?	?	Other Database Import
A/Malaysia/17230/1998	flu	EPI373263	1998-05-25	southeast_asia	malaysia	malaysia	malaysia	undetermined	?	?	?	Other Database Import
A/Guangzhou/331/1998	flu	EPI360681	1998-05-25	china	china	guangdong	guangzhou	undetermined	?	?	?	Other Database Import
A/Dakar/1/1998	flu	EPI347451	1998-05-28	africa	senegal	dakar	dakar	cell	2y	?	Institut Pasteur De Dakar	National Institute For Medical Research
A/Malaysia/17276/1998	flu	EPI371875	1998-05-29	southeast_asia	malaysia	malaysia	malaysia	undetermined	?	?	?	Other Database Import
A/Shenzhen/1195/1998	flu	EPI360672	1998-06-04	china	china	guangdong	shenzhen	undetermined	?	?	?	Other Database Import
A/Hainan/10/1998	flu	EPI360688	1998-06-08	china	china	hainan	hainan	undetermined	?	?	?	Other Database Import
A/Sichuan/326/1998	flu	EPI360703	1998-06-08	china	china	sichuan	sichuan	undetermined	?	?	?	Other Database Import
A/Johannesburg/29/1998	flu	EPI347446	1998-06-10	africa	south_africa	gauteng	johannesburg	cell	?	?	National Institute For Communicable Disease	National Institute For Medical Research
A/Malaysia/17392/1998	flu	EPI373279	1998-06-15	southeast_asia	malaysia	malaysia	malaysia	undetermined	?	?	?	Other Database Import
A/Malaysia/17332/1998	flu	EPI373271	1998-06-19	southeast_asia	malaysia	malaysia	malaysia	undetermined	?	?	?	Other Database Import
A/Taiwan/287/1998	flu	EPI444655	1998-06-20	china	taiwan	taiwan	taiwan	cell	?	?	?	Other Database Import
A/Guanger/211/1998	flu	EPI360678	1998-06-20	china	china	china	china	undetermined	?	?	?	Other Database Import
A/Shantou/133/1998	flu	EPI360698	1998-06-21	china	china	guangdong	shantou	undetermined	?	?	?	Other Database Import
A/Mauritius/434/1998	flu	EPI347449	1998-06-25	africa	mauritius	mauritius	mauritius	cell	46y	?	Central Health Laboratory	National Institute For Medical Research
A/Taiwan/317/1998	flu	EPI444656	1998-06-27	china	taiwan	taiwan	taiwan	cell	?	?	?	Other Database Import
A/Sichuan/350/1998	flu	EPI360704	1998-06-28	china	china	sichuan	sichuan	undetermined	?	?	?	Other Database Import
A/Dakar/3/1998	flu	EPI347443	1998-07-02	africa	senegal	dakar	dakar	cell	22y	?	Institut Pasteur De Dakar	National Institute For Medical Research
A/Sichuan/418/1998	flu	EPI360702	1998-07-06	china	china	sichuan	sichuan	undetermined	?	?	?	Other Database Import
A/Guangzhou/499/1998	flu	EPI360684	1998-07-13	china	china	guangdong	guangzhou	undetermined	?	?	?	Other Database Import
A/HongKong/CUHK16614/1998	flu	EPI161008	1998-07-13	china	hong_kong	hong_kong	hong_kong	undetermined	?	?	?	Other Database Import
A/Reunion/2369/1998	flu	EPI347448	1998-07-14	europe	france	saint_denis	reunion	cell	9y	?	Crr Virus Influenza Region Sud	National Institute For Medical Research
A/Dakar/6/1998	flu	EPI347444	1998-07-15	africa	senegal	dakar	dakar	cell	30y	?	Institut Pasteur De Dakar	National Institute For Medical Research
A/Shenzhen/1219/1998	flu	EPI360699	1998-07-24	china	china	guangdong	shenzhen	undetermined	?	?	?	Other Database Import
A/HongKong/CUHK17464/1998	flu	EPI161009	1998-08-06	china	hong_kong	hong_kong	hong_kong	undetermined	?	?	?	Other Database Import
A/Malaysia/17998/1998	flu	EPI373287	1998-08-09	southeast_asia	malaysia	malaysia	malaysia	undetermined	?	?	?	Other Database Import
A/HongKong/CUHK17603/1998	flu	EPI161010	1998-08-12	china	hong_kong	hong_kong	hong_kong	undetermined	?	?	?	Other Database Import
A/HongKong/CUHK17643/1998	flu	EPI161011	1998-08-14	china	hong_kong	hong_kong	hong_kong	undetermined	?	?	?	Other Database Import
A/HongKong/CUHK17697/1998	flu	EPI161012	1998-08-16	china	hong_kong	hong_kong	hong_kong	undetermined	?	?	?	Other Database Import
A/HongKong/CUHK17704/1998	flu	EPI161013	1998-08-17	china	hong_kong	hong_kong	hong_kong	undetermined	?	?	?	Other Database Import
A/Christchurch/45/1998	flu	EPI116881	1998-08-17	oceania	new_zealand	canterbury	christchurch	cell	?	?	?	Other Database Import
A/HongKong/CUHK17707/1998	flu	EPI161014	1998-08-18	china	hong_kong	hong_kong	hong_kong	undetermined	?	?	?	Other Database Import
A/Shanghai/180/1998	flu	EPI360710	1998-08-20	china	china	shanghai	shanghai	undetermined	?	?	?	Other Database Import
A/HongKong/CUHK17872/1998	flu	EPI161015	1998-08-24	china	hong_kong	hong_kong	hong_kong	undetermined	?	?	?	Other Database Import
A/HongKong/CUHK18036/1998	flu	EPI161016	1998-08-31	china	hong_kong	hong_kong	hong_kong	undetermined	?	?	?	Other Database Import
A/Shanghai/195/1998	flu	EPI360697	1998-09-03	china	china	shanghai	shanghai	undetermined	?	?	?	Other Database Import
A/HongKong/CUHK18194/1998	flu	EPI161017	1998-09-04	china	hong_kong	hong_kong	hong_kong	undetermined	?	?	?	Other Database Import
A/HongKong/CUHK18218/1998	flu	EPI161018	1998-09-05	china	hong_kong	hong_kong	hong_kong	undetermined	?	?	?	Other Database Import
A/HongKong/CUHK18230/1998	flu	EPI161019	1998-09-07	china	hong_kong	hong_kong	hong_kong	undetermined	?	?	?	Other Database Import
A/HongKong/CUHK18351/1998	flu	EPI161020	1998-09-10	china	hong_kong	hong_kong	hong_kong	undetermined	?	?	?	Other Database Import
A/HongKong/CUHK18358/1998	flu	EPI161021	1998-09-10	china	hong_kong	hong_kong	hong_kong	undetermined	?	?	?	Other Database Import
A/Guangzhou/720/1998	flu	EPI360679	1998-09-14	china	china	guangdong	guangzhou	undetermined	?	?	?	Other Database Import
A/HongKong/CUHK18610/1998	flu	EPI161022	1998-09-21	china	hong_kong	hong_kong	hong_kong	undetermined	?	?	?	Other Database Import
A/Malaysia/18121/1998	flu	EPI373303	1998-09-21	southeast_asia	malaysia	malaysia	malaysia	undetermined	?	?	?	Other Database Import
A/Malaysia/18128/1998	flu	EPI373311	1998-09-21	southeast_asia	malaysia	malaysia	malaysia	undetermined	?	?	?	Other Database Import
A/HongKong/CUHK18886/1998	flu	EPI161023	1998-10-03	china	hong_kong	hong_kong	hong_kong	undetermined	?	?	?	Other Database Import
A/Guangzhou/602/1998	flu	EPI360685	1998-10-23	china	china	guangdong	guangzhou	undetermined	?	?	?	Other Database Import
A/NewYork/247/1998	flu	EPI54050	1998-11-02	north_america	usa	new_york	new_york	cell	?	?	?	Other Database Import
A/HongKong/CUHK19579/1998	flu	EPI161024	1998-11-06	china	hong_kong	hong_kong	hong_kong	undetermined	?	?	?	Other Database Import
A/Netherlands/427/1998	flu	EPI362889	1998-11-16	europe	netherlands	netherlands	netherlands	cell	?	?	?	Other Database Import
A/Harbin/36/1998	flu	EPI360690	1998-11-20	china	china	heilongjiang	harbin	undetermined	?	?	?	Other Database Import
A/NewYork/448/1998	flu	EPI84464	1998-11-23	north_america	usa	new_york	new_york	cell	?	?	?	Other Database Import
A/Guangzhou/933/1998	flu	EPI360671	1998-12-02	china	china	guangdong	guangzhou	undetermined	?	?	?	Other Database Import
A/Guangzhou/934/1998	flu	EPI360683	1998-12-02	china	china	guangdong	guangzhou	undetermined	?	?	?	Other Database Import
A/NewYork/289/1998	flu	EPI78343	1998-12-04	north_america	usa	new_york	new_york	cell	?	?	?	Other Database Import
A/Cnic/14/1998	flu	EPI360674	1998-12-05	china	china	china	cnic	undetermined	?	?	?	Other Database Import
A/NewYork/250/1998	flu	EPI54029	1998-12-12	north_america	usa	new_york	new_york	cell	?	?	?	Other Database Import
A/NewYork/249/1998	flu	EPI54010	1998-12-12	north_america	usa	new_york	new_york	cell	?	?	?	Other Database Import
A/Cnic/113/1998	flu	EPI360669	1998-12-12	china	china	china	cnic	undetermined	?	?	?	Other Database Import
A/Cnic/129/1998	flu	EPI360668	1998-12-13	china	china	china	cnic	undetermined	?	?	?	Other Database Import
A/Netherlands/462/1998	flu	EPI367049	1998-12-16	europe	netherlands	netherlands	netherlands	cell	?	?	?	Other Database Import
A/Beijing/130/1998	flu	EPI360673	1998-12-16	china	china	beijing	beijing	undetermined	?	?	?	Other Database Import
A/HongKong/CUHK50552/1998	flu	EPI161159	1998-12-21	china	hong_kong	hong_kong	hong_kong	undetermined	?	?	?	Other Database Import
A/NewYork/224/1998	flu	EPI54202	1998-12-28	north_america	usa	new_york	new_york	cell	?	?	?	Other Database Import
A/NewYork/313/1998	flu	EPI78419	1998-12-28	north_america	usa	new_york	new_york	cell	?	?	?	Other Database Import
A/NewYork/240/1998	flu	EPI53991	1998-12-28	north_america	usa	new_york	new_york	cell	?	?	?	Other Database Import
A/NewYork/251/1998	flu	EPI80129	1998-12-28	north_america	usa	new_york	new_york	cell	?	?	?	Other Database Import
A/NewYork/328/1998	flu	EPI79730	1998-12-28	north_america	usa	new_york	new_york	cell	?	?	?	Other Database Import
A/NewYork/287/1998	flu	EPI54449	1998-12-29	north_america	usa	new_york	new_york	cell	?	?	?	Other Database Import
A/NewYork/256/1998	flu	EPI54240	1998-12-30	north_america	usa	new_york	new_york	cell	?	?	?	Other Database Import
A/HongKong/CUHK50722/1998	flu	EPI161162	1998-12-30	china	hong_kong	hong_kong	hong_kong	undetermined	?	?	?	Other Database Import
A/NewYork/330/1998	flu	EPI79749	1998-12-30	north_america	usa	new_york	new_york	cell	?	?	?	Other Database Import
A/NewYork/304/1998	flu	EPI78381	1998-12-30	north_america	usa	new_york	new_york	cell	?	?	?	Other Database Import
A/NewYork/254/1998	flu	EPI79141	1998-12-31	north_america	usa	new_york	new_york	cell	?	?	?	Other Database Import
A/Zhejiang/4/1999	flu	EPI360740	1999-01-01	china	china	zhejiang	zhejiang	undetermined	?	?	?	Other Database Import
A/NewYork/317/1999	flu	EPI78476	1999-01-04	north_america	usa	new_york	new_york	cell	?	?	?	Other Database Import
A/NewYork/449/1999	flu	EPI84483	1999-01-04	north_america	usa	new_york	new_york	cell	?	?	?	Other Database Import
A/NewYork/315/1999	flu	EPI78457	1999-01-06	north_america	usa	new_york	new_york	cell	?	?	?	Other Database Import
A/HongKong/CUHK10100/1999	flu	EPI160952	1999-01-07	china	hong_kong	hong_kong	hong_kong	undetermined	?	?	?	Other Database Import
A/NewYork/277/1999	flu	EPI78248	1999-01-08	north_america	usa	new_york	new_york	cell	?	?	?	Other Database Import
A/HongKong/CUHK10132/1999	flu	EPI160953	1999-01-08	china	hong_kong	hong_kong	hong_kong	undetermined	?	?	?	Other Database Import
A/NewYork/450/1999	flu	EPI84502	1999-01-08	north_america	usa	new_york	new_york	cell	?	?	?	Other Database Import
A/HongKong/CUHK10133/1999	flu	EPI160954	1999-01-08	china	hong_kong	hong_kong	hong_kong	undetermined	?	?	?	Other Database Import
A/HongKong/CUHK10151/1999	flu	EPI160955	1999-01-09	china	hong_kong	hong_kong	hong_kong	undetermined	?	?	?	Other Database Import
A/Townsville/1/1999	flu	EPI116885	1999-01-10	oceania	australia	queensland	townsville	cell	?	?	?	Other Database Import
A/Dakar/2/1999	flu	EPI347445	1999-01-11	africa	senegal	dakar	dakar	cell	7y	?	Institut Pasteur De Dakar	National Institute For Medical Research
A/NewYork/452/1999	flu	EPI90442	1999-01-11	north_america	usa	new_york	new_york	cell	?	?	?	Other Database Import
A/NewYork/451/1999	flu	EPI84521	1999-01-11	north_america	usa	new_york	new_york	cell	?	?	?	Other Database Import
A/NewYork/252/1999	flu	EPI80148	1999-01-12	north_america	usa	new_york	new_york	cell	?	?	?	Other Database Import
A/NewYork/453/1999	flu	EPI84540	1999-01-12	north_america	usa	new_york	new_york	cell	?	?	?	Other Database Import
A/NewYork/454/1999	flu	EPI84559	1999-01-13	north_america	usa	new_york	new_york	cell	?	?	?	Other Database Import
A/NewYork/455/1999	flu	EPI90461	1999-01-14	north_america	usa	new_york	new_york	cell	?	?	?	Other Database Import
A/NewYork/456/1999	flu	EPI84578	1999-01-15	north_america	usa	new_york	new_york	cell	?	?	?	Other Database Import
A/NewYork/457/1999	flu	EPI84597	1999-01-15	north_america	usa	new_york	new_york	cell	?	?	?	Other Database Import
A/Finland/620/1999	flu	EPI347441	1999-01-15	europe	finland	finland	finland	cell	?	?	National Institute For Health And Welfare	National Institute For Medical Research
A/NewYork/321/1999	flu	EPI78533	1999-01-17	north_america	usa	new_york	new_york	cell	?	?	?	Other Database Import
A/NewYork/347/1999	flu	EPI79559	1999-01-19	north_america	usa	new_york	new_york	cell	?	?	?	Other Database Import
A/NewYork/335/1999	flu	EPI78628	1999-01-20	north_america	usa	new_york	new_york	undetermined	?	?	?	Other Database Import
A/NewYork/326/1999	flu	EPI94145	1999-01-21	north_america	usa	new_york	new_york	cell	?	?	?	Other Database Import
A/Guangzhou/57/1999	flu	EPI360721	1999-01-21	china	china	guangdong	guangzhou	undetermined	?	?	?	Other Database Import
A/Malaysia/10759/1999	flu	EPI373295	1999-01-22	southeast_asia	malaysia	malaysia	malaysia	undetermined	?	?	?	Other Database Import
A/NewYork/458/1999	flu	EPI84616	1999-01-22	north_america	usa	new_york	new_york	cell	?	?	?	Other Database Import
A/Chongqing/1/1999	flu	EPI360714	1999-01-23	china	china	chongqing	chongqing	undetermined	?	?	?	Other Database Import
A/NewYork/340/1999	flu	EPI78704	1999-01-23	north_america	usa	new_york	new_york	cell	?	?	?	Other Database Import
A/Chongqing/3/1999	flu	EPI360715	1999-01-23	china	china	chongqing	chongqing	undetermined	?	?	?	Other Database Import
A/NewYork/285/1999	flu	EPI79198	1999-01-25	north_america	usa	new_york	new_york	cell	?	?	?	Other Database Import
A/NewYork/459/1999	flu	EPI84635	1999-01-25	north_america	usa	new_york	new_york	cell	?	?	?	Other Database Import
A/NewYork/323/1999	flu	EPI78552	1999-01-25	north_america	usa	new_york	new_york	cell	?	?	?	Other Database Import
A/NewYork/460/1999	flu	EPI92397	1999-01-25	north_america	usa	new_york	new_york	cell	?	?	?	Other Database Import
A/NewYork/262/1999	flu	EPI54278	1999-01-25	north_america	usa	new_york	new_york	cell	?	?	?	Other Database Import
A/Guangzhou/62/1999	flu	EPI360720	1999-01-26	china	china	guangdong	guangzhou	undetermined	?	?	?	Other Database Import
A/NewYork/316/1999	flu	EPI79236	1999-01-26	north_america	usa	new_york	new_york	cell	?	?	?	Other Database Import
A/NewYork/324/1999	flu	EPI78799	1999-01-26	north_america	usa	new_york	new_york	cell	?	?	?	Other Database Import
A/NewYork/331/1999	flu	EPI78818	1999-01-28	north_america	usa	new_york	new_york	cell	?	?	?	Other Database Import
A/Wuhan/46/1999	flu	EPI360739	1999-01-28	china	china	hubei	wuhan	undetermined	?	?	?	Other Database Import
A/NewYork/265/1999	flu	EPI54316	1999-01-29	north_america	usa	new_york	new_york	cell	?	?	?	Other Database Import
A/NewYork/329/1999	flu	EPI78590	1999-02-01	north_america	usa	new_york	new_york	cell	?	?	?	Other Database Import
A/NewYork/248/1999	flu	EPI54487	1999-02-02	north_america	usa	new_york	new_york	cell	?	?	?	Other Database Import
A/NewYork/318/1999	flu	EPI78495	1999-02-02	north_america	usa	new_york	new_york	cell	?	?	?	Other Database Import
A/NewYork/259/1999	flu	EPI54259	1999-02-02	north_america	usa	new_york	new_york	cell	?	?	?	Other Database Import
A/NewYork/257/1999	flu	EPI54525	1999-02-03	north_america	usa	new_york	new_york	cell	?	?	?	Other Database Import
A/NewYork/314/1999	flu	EPI78438	1999-02-03	north_america	usa	new_york	new_york	cell	?	?	?	Other Database Import
A/Darwin/2/1999	flu	EPI116899	1999-02-04	oceania	australia	northern_territory	darwin	cell	?	?	?	Other Database Import
A/NewYork/397/1999	flu	EPI90687	1999-02-04	north_america	usa	new_york	new_york	cell	?	?	?	Other Database Import
A/NewYork/278/1999	flu	EPI78780	1999-02-04	north_america	usa	new_york	new_york	cell	?	?	?	Other Database Import
A/Guangzhou/93/1999	flu	EPI360722	1999-02-06	china	china	guangdong	guangzhou	undetermined	?	?	?	Other Database Import
A/NewYork/338/1999	flu	EPI78685	1999-02-08	north_america	usa	new_york	new_york	cell	?	?	?	Other Database Import
A/NewYork/339/1999	flu	EPI80205	1999-02-09	north_america	usa	new_york	new_york	cell	?	?	?	Other Database Import
A/HongKong/CUHK11163/1999	flu	EPI160969	1999-02-09	china	hong_kong	hong_kong	hong_kong	undetermined	?	?	?	Other Database Import
A/HongKong/CUHK11230/1999	flu	EPI160970	1999-02-10	china	hong_kong	hong_kong	hong_kong	undetermined	?	?	?	Other Database Import
A/NewYork/263/1999	flu	EPI53840	1999-02-10	north_america	usa	new_york	new_york	cell	?	?	?	Other Database Import
A/NewYork/255/1999	flu	EPI54506	1999-02-10	north_america	usa	new_york	new_york	cell	?	?	?	Other Database Import
A/NewYork/282/1999	flu	EPI78305	1999-02-11	north_america	usa	new_york	new_york	cell	?	?	?	Other Database Import
A/HongKong/CUHK11255/1999	flu	EPI160973	1999-02-11	china	hong_kong	hong_kong	hong_kong	undetermined	?	?	?	Other Database Import
A/HongKong/CUHK11241/1999	flu	EPI160972	1999-02-11	china	hong_kong	hong_kong	hong_kong	undetermined	?	?	?	Other Database Import
A/NewYork/260/1999	flu	EPI78761	1999-02-11	north_america	usa	new_york	new_york	cell	?	?	?	Other Database Import
A/HongKong/CUHK11237/1999	flu	EPI160971	1999-02-11	china	hong_kong	hong_kong	hong_kong	undetermined	?	?	?	Other Database Import
A/NewYork/283/1999	flu	EPI79179	1999-02-12	north_america	usa	new_york	new_york	cell	?	?	?	Other Database Import
A/NewYork/333/1999	flu	EPI78609	1999-02-16	north_america	usa	new_york	new_york	cell	?	?	?	Other Database Import
A/NewYork/290/1999	flu	EPI78362	1999-02-17	north_america	usa	new_york	new_york	cell	?	?	?	Other Database Import
A/NewYork/332/1999	flu	EPI78837	1999-02-17	north_america	usa	new_york	new_york	cell	?	?	?	Other Database Import
A/NewCaledonia/1/1999	flu	EPI116901	1999-02-19	oceania	new_caledonia	new_caledonia	new_caledonia	cell	?	?	?	Other Database Import
A/NewYork/279/1999	flu	EPI78267	1999-02-23	north_america	usa	new_york	new_york	cell	?	?	?	Other Database Import
A/NewYork/336/1999	flu	EPI78647	1999-02-24	north_america	usa	new_york	new_york	cell	?	?	?	Other Database Import
A/NewYork/288/1999	flu	EPI78324	1999-02-26	north_america	usa	new_york	new_york	cell	?	?	?	Other Database Import
A/NewYork/325/1999	flu	EPI79711	1999-02-26	north_america	usa	new_york	new_york	cell	?	?	?	Other Database Import
A/NewYork/311/1999	flu	EPI78400	1999-03-01	north_america	usa	new_york	new_york	cell	?	?	?	Other Database Import
A/Shanghai/42/1999	flu	EPI360711	1999-03-02	china	china	shanghai	shanghai	undetermined	?	?	?	Other Database Import
A/NewYork/264/1999	flu	EPI54297	1999-03-03	north_america	usa	new_york	new_york	cell	?	?	?	Other Database Import
A/Guangzhou/118/1999	flu	EPI360724	1999-03-06	china	china	guangdong	guangzhou	undetermined	?	?	?	Other Database Import
A/NewYork/337/1999	flu	EPI78666	1999-03-08	north_america	usa	new_york	new_york	cell	?	?	?	Other Database Import
A/NewYork/284/1999	flu	EPI54411	1999-03-08	north_america	usa	new_york	new_york	cell	?	?	?	Other Database Import
A/Shanghai/44/1999	flu	EPI360730	1999-03-11	china	china	shanghai	shanghai	undetermined	?	?	?	Other Database Import
A/NewYork/322/1999	flu	EPI79255	1999-03-18	north_america	usa	new_york	new_york	cell	?	?	?	Other Database Import
A/NewYork/286/1999	flu	EPI54430	1999-03-19	north_america	usa	new_york	new_york	cell	?	?	?	Other Database Import
A/HongKong/CUHK12312/1999	flu	EPI160977	1999-03-24	china	hong_kong	hong_kong	hong_kong	undetermined	?	?	?	Other Database Import
A/NewYork/327/1999	flu	EPI78571	1999-03-24	north_america	usa	new_york	new_york	cell	?	?	?	Other Database Import
A/NewYork/398/1999	flu	EPI79578	1999-03-24	north_america	usa	new_york	new_york	cell	?	?	?	Other Database Import
A/NewYork/320/1999	flu	EPI78514	1999-03-26	north_america	usa	new_york	new_york	cell	?	?	?	Other Database Import
A/NewYork/253/1999	flu	EPI54221	1999-03-26	north_america	usa	new_york	new_york	cell	?	?	?	Other Database Import
A/Fujian/54/1999	flu	EPI360717	1999-03-30	china	china	fujian	fujian	undetermined	?	?	?	Other Database Import
A/HongKong/CUHK12572/1999	flu	EPI160984	1999-04-02	china	hong_kong	hong_kong	hong_kong	undetermined	?	?	?	Other Database Import
A/HongKong/CUHK12580/1999	flu	EPI160985	1999-04-04	china	hong_kong	hong_kong	hong_kong	undetermined	?	?	?	Other Database Import
A/NewYork/261/1999	flu	EPI80167	1999-04-09	north_america	usa	new_york	new_york	cell	?	?	?	Other Database Import
A/NewYork/280/1999	flu	EPI78286	1999-04-12	north_america	usa	new_york	new_york	cell	?	?	?	Other Database Import
A/HongKong/CUHK12897/1999	flu	EPI160988	1999-04-14	china	hong_kong	hong_kong	hong_kong	undetermined	?	?	?	Other Database Import
A/NewCaledonia/11/1999	flu	EPI116765	1999-04-17	oceania	new_caledonia	new_caledonia	new_caledonia	cell	?	?	?	Other Database Import
A/Fujian/90/1999	flu	EPI360718	1999-04-20	china	china	fujian	fujian	undetermined	?	?	?	Other Database Import
A/Guangzhou/242/1999	flu	EPI360723	1999-04-26	china	china	guangdong	guangzhou	undetermined	?	?	?	Other Database Import
A/NewYork/266/1999	flu	EPI79635	1999-05-06	north_america	usa	new_york	new_york	cell	?	?	?	Other Database Import
A/HongKong/CUHK13763/1999	flu	EPI161003	1999-05-15	china	hong_kong	hong_kong	hong_kong	undetermined	?	?	?	Other Database Import
A/Dakar/19/1999	flu	EPI347437	1999-06-01	africa	senegal	dakar	dakar	cell	3y	?	Institut Pasteur De Dakar	National Institute For Medical Research
A/HongKong/CUHK14627/1999	flu	EPI161004	1999-06-11	china	hong_kong	hong_kong	hong_kong	undetermined	?	?	?	Other Database Import
A/HongKong/CUHK14672/1999	flu	EPI161005	1999-06-13	china	hong_kong	hong_kong	hong_kong	undetermined	?	?	?	Other Database Import
A/HongKong/CUHK14875/1999	flu	EPI161006	1999-06-20	china	hong_kong	hong_kong	hong_kong	undetermined	?	?	?	Other Database Import
A/HongKong/CUHK30314/1999	flu	EPI161102	1999-07-03	china	hong_kong	hong_kong	hong_kong	undetermined	?	?	?	Other Database Import
A/HongKong/CUHK30419/1999	flu	EPI161103	1999-07-05	china	hong_kong	hong_kong	hong_kong	undetermined	?	?	?	Other Database Import
A/HongKong/CUHK30423/1999	flu	EPI161104	1999-07-06	china	hong_kong	hong_kong	hong_kong	undetermined	?	?	?	Other Database Import
A/Shenzhen/474/1999	flu	EPI360731	1999-07-07	china	china	guangdong	shenzhen	undetermined	?	?	?	Other Database Import
A/HongKong/CUHK30605/1999	flu	EPI161105	1999-07-12	china	hong_kong	hong_kong	hong_kong	undetermined	?	?	?	Other Database Import
A/Taiwan/365/1999	flu	EPI444657	1999-07-15	china	taiwan	taiwan	taiwan	cell	?	?	?	Other Database Import
A/HongKong/CUHK31421/1999	flu	EPI161106	1999-08-04	china	hong_kong	hong_kong	hong_kong	undetermined	?	?	?	Other Database Import
A/HongKong/CUHK31448/1999	flu	EPI161107	1999-08-04	china	hong_kong	hong_kong	hong_kong	undetermined	?	?	?	Other Database Import
A/HongKong/CUHK31490/1999	flu	EPI161108	1999-08-06	china	hong_kong	hong_kong	hong_kong	undetermined	?	?	?	Other Database Import
A/HongKong/CUHK31510/1999	flu	EPI161109	1999-08-07	china	hong_kong	hong_kong	hong_kong	undetermined	?	?	?	Other Database Import
A/Taiwan/429/1999	flu	EPI444658	1999-09-02	china	taiwan	taiwan	taiwan	cell	?	?	?	Other Database Import
A/HongKong/CUHK32796/1999	flu	EPI161110	1999-09-20	china	hong_kong	hong_kong	hong_kong	undetermined	?	?	?	Other Database Import
A/NewYork/428/1999	flu	EPI85034	1999-09-28	north_america	usa	new_york	new_york	cell	?	?	?	Other Database Import
A/NewYork/138/1999	flu	EPI52852	1999-10-03	north_america	usa	new_york	new_york	cell	?	?	?	Other Database Import
A/NewYork/137/1999	flu	EPI53163	1999-10-04	north_america	usa	new_york	new_york	cell	?	?	?	Other Database Import
A/Georgia/NHRC0001/1999	flu	EPI318448	1999-10-12	north_america	usa	georgia	georgia	unpassaged	?	?	?	Other Database Import
A/NewYork/177/1999	flu	EPI52226	1999-10-25	north_america	usa	new_york	new_york	undetermined	?	?	?	Other Database Import
A/Taiwan/511/1999	flu	EPI444659	1999-10-26	china	taiwan	taiwan	taiwan	cell	?	?	?	Other Database Import
A/HongKong/CUHK33829/1999	flu	EPI161120	1999-10-27	china	hong_kong	hong_kong	hong_kong	undetermined	?	?	?	Other Database Import
A/HongKong/CUHK33915/1999	flu	EPI161124	1999-10-30	china	hong_kong	hong_kong	hong_kong	undetermined	?	?	?	Other Database Import
A/HongKong/CUHK33885/1999	flu	EPI161122	1999-10-30	china	hong_kong	hong_kong	hong_kong	undetermined	?	?	?	Other Database Import
A/Illinois/NHRC0001/1999	flu	EPI318456	1999-11-01	north_america	usa	illinois	illinois	unpassaged	?	?	?	Other Database Import
A/HongKong/CUHK34193/1999	flu	EPI161128	1999-11-09	china	hong_kong	hong_kong	hong_kong	undetermined	?	?	?	Other Database Import
A/NewYork/145/1999	flu	EPI53783	1999-11-09	north_america	usa	new_york	new_york	cell	?	?	?	Other Database Import
A/NewYork/141/1999	flu	EPI52416	1999-11-09	north_america	usa	new_york	new_york	cell	?	?	?	Other Database Import
A/Dakar/115/1999	flu	EPI347436	1999-11-11	africa	senegal	dakar	dakar	cell	17y	?	Institut Pasteur De Dakar	National Institute For Medical Research
A/Oslo/2501/1999	flu	EPI119251	1999-11-20	europe	norway	ostlandet	oslo	cell	?	?	?	Other Database Import
A/NewYork/147/1999	flu	EPI28289	1999-11-23	north_america	usa	new_york	new_york	cell	?	?	?	Other Database Import
A/NewYork/179/1999	flu	EPI52245	1999-11-24	north_america	usa	new_york	new_york	cell	?	?	?	Other Database Import
A/Oslo/2137/1999	flu	EPI119249	1999-11-24	europe	norway	ostlandet	oslo	cell	?	?	?	Other Database Import
A/Harbin/59/1999	flu	EPI360726	1999-11-26	china	china	heilongjiang	harbin	undetermined	?	?	?	Other Database Import
A/NewYork/143/1999	flu	EPI28384	1999-11-26	north_america	usa	new_york	new_york	cell	?	?	?	Other Database Import
A/SouthCarolina/NHRC0001/1999	flu	EPI318464	1999-11-29	north_america	usa	south_carolina	south_carolina	unpassaged	?	?	?	Other Database Import
A/NewYork/149/1999	flu	EPI27966	1999-11-29	north_america	usa	new_york	new_york	cell	?	?	?	Other Database Import
A/NewYork/183/1999	flu	EPI53726	1999-12-01	north_america	usa	new_york	new_york	cell	?	?	?	Other Database Import
A/NewYork/151/1999	flu	EPI28308	1999-12-04	north_america	usa	new_york	new_york	cell	?	?	?	Other Database Import
A/NewYork/139/1999	flu	EPI53707	1999-12-04	north_america	usa	new_york	new_york	cell	?	?	?	Other Database Import
A/NewYork/181/1999	flu	EPI53296	1999-12-05	north_america	usa	new_york	new_york	cell	?	?	?	Other Database Import
A/Shenzhen/1090/1999	flu	EPI360713	1999-12-06	china	china	guangdong	shenzhen	undetermined	?	?	?	Other Database Import
A/Oslo/2512/1999	flu	EPI119253	1999-12-07	europe	norway	ostlandet	oslo	cell	?	?	?	Other Database Import
A/NewYork/155/1999	flu	EPI53916	1999-12-07	north_america	usa	new_york	new_york	undetermined	?	?	?	Other Database Import
A/Oslo/3161/1999	flu	EPI238386	1999-12-08	europe	norway	ostlandet	oslo	undetermined	?	?	?	Other Database Import
A/NewYork/153/1999	flu	EPI79597	1999-12-09	north_america	usa	new_york	new_york	cell	?	?	?	Other Database Import
A/Oslo/5631/1999	flu	EPI119257	1999-12-10	europe	norway	ostlandet	oslo	cell	?	?	?	Other Database Import
A/NewYork/188/1999	flu	EPI54107	1999-12-13	north_america	usa	new_york	new_york	cell	?	?	?	Other Database Import
A/NewYork/422/1999	flu	EPI84996	1999-12-15	north_america	usa	new_york	new_york	cell	?	?	?	Other Database Import
A/NewYork/157/1999	flu	EPI52473	1999-12-15	north_america	usa	new_york	new_york	cell	?	?	?	Other Database Import
A/NewYork/423/1999	flu	EPI85015	1999-12-16	north_america	usa	new_york	new_york	cell	?	?	?	Other Database Import
A/NewYork/424/1999	flu	EPI83666	1999-12-16	north_america	usa	new_york	new_york	cell	?	?	?	Other Database Import
A/NewYork/161/1999	flu	EPI28346	1999-12-16	north_america	usa	new_york	new_york	cell	?	?	?	Other Database Import
A/Canterbury/179/1999	flu	EPI29158	1999-12-17	oceania	new_zealand	canterbury	canterbury	cell	?	?	?	Other Database Import
A/NewYork/425/1999	flu	EPI84179	1999-12-17	north_america	usa	new_york	new_york	cell	?	?	?	Other Database Import
A/NewYork/189/1999	flu	EPI52890	1999-12-20	north_america	usa	new_york	new_york	cell	?	?	?	Other Database Import
A/NewYork/426/1999	flu	EPI83685	1999-12-20	north_america	usa	new_york	new_york	cell	?	?	?	Other Database Import
A/NewYork/184/1999	flu	EPI53935	1999-12-20	north_america	usa	new_york	new_york	cell	?	?	?	Other Database Import
A/NewYork/163/1999	flu	EPI28403	1999-12-22	north_america	usa	new_york	new_york	cell	?	?	?	Other Database Import
A/Scotland/230/1999	flu	EPI314886	1999-12-23	europe	united_kingdom	scotland	scotland	undetermined	?	?	?	Other Database Import
A/Scotland/211/1999	flu	EPI314885	1999-12-23	europe	united_kingdom	scotland	scotland	undetermined	?	?	?	Other Database Import
A/NewYork/186/1999	flu	EPI52549	1999-12-24	north_america	usa	new_york	new_york	cell	?	?	?	Other Database Import
A/NewYork/166/1999	flu	EPI52435	1999-12-24	north_america	usa	new_york	new_york	cell	?	?	?	Other Database Import
A/NewYork/185/1999	flu	EPI52283	1999-12-25	north_america	usa	new_york	new_york	cell	?	?	?	Other Database Import
A/NewYork/172/1999	flu	EPI28498	1999-12-26	north_america	usa	new_york	new_york	cell	?	?	?	Other Database Import
A/NewYork/427/1999	flu	EPI83704	1999-12-27	north_america	usa	new_york	new_york	cell	?	?	?	Other Database Import
A/NewYork/164/1999	flu	EPI53517	1999-12-27	north_america	usa	new_york	new_york	cell	?	?	?	Other Database Import
A/NewYork/140/1999	flu	EPI80053	1999-12-27	north_america	usa	new_york	new_york	undetermined	?	?	?	Other Database Import
A/Oslo/841/2000	flu	EPI238389	1999-12-28	europe	norway	ostlandet	oslo	undetermined	?	?	?	Other Database Import
A/NewYork/171/1999	flu	EPI28479	1999-12-30	north_america	usa	new_york	new_york	cell	?	?	?	Other Database Import
A/Henan/104/1999	flu	EPI360727	1999-12-30	china	china	henan	henan	undetermined	?	?	?	Other Database Import
A/NewYork/167/1999	flu	EPI28422	1999-12-30	north_america	usa	new_york	new_york	cell	?	?	?	Other Database Import
A/Henan/102/1999	flu	EPI360728	1999-12-30	china	china	henan	henan	undetermined	?	?	?	Other Database Import
A/Guizhou/105/1999	flu	EPI360738	1999-12-30	china	china	guizhou	guizhou	undetermined	?	?	?	Other Database Import
A/Scotland/262/1999	flu	EPI314887	1999-12-31	europe	united_kingdom	scotland	scotland	undetermined	?	?	?	Other Database Import
A/NewYork/421/1999	flu	EPI84160	1999-12-31	north_america	usa	new_york	new_york	cell	?	?	?	Other Database Import
A/Beijing/4/2000	flu	EPI360168	2000-01-01	china	china	beijing	beijing	undetermined	?	?	?	Other Database Import
A/NewYork/169/2000	flu	EPI28441	2000-01-03	north_america	usa	new_york	new_york	cell	?	?	?	Other Database Import
A/NewYork/430/2000	flu	EPI84198	2000-01-03	north_america	usa	new_york	new_york	cell	?	?	?	Other Database Import
A/NewYork/160/2000	flu	EPI52833	2000-01-03	north_america	usa	new_york	new_york	cell	?	?	?	Other Database Import
A/NewYork/168/2000	flu	EPI52511	2000-01-03	north_america	usa	new_york	new_york	cell	?	?	?	Other Database Import
A/NewYork/431/2000	flu	EPI83723	2000-01-03	north_america	usa	new_york	new_york	cell	?	?	?	Other Database Import
A/NewYork/3/2000	flu	EPI609297	2000-01-03	north_america	usa	new_york	new_york	undetermined	?	?	?	Other Database Import
A/NewYork/429/2000	flu	EPI85053	2000-01-03	north_america	usa	new_york	new_york	cell	?	?	?	Other Database Import
A/NewYork/174/2000	flu	EPI28536	2000-01-04	north_america	usa	new_york	new_york	cell	?	?	?	Other Database Import
A/Arkansas/2/2000	flu	EPI609476	2000-01-04	north_america	usa	arkansas	arkansas	undetermined	?	?	?	Other Database Import
A/California/4/2000	flu	EPI609530	2000-01-05	north_america	usa	california	california	undetermined	?	?	?	Other Database Import
A/NewYork/170/2000	flu	EPI28460	2000-01-05	north_america	usa	new_york	new_york	cell	?	?	?	Other Database Import
A/NewYork/156/2000	flu	EPI53802	2000-01-05	north_america	usa	new_york	new_york	cell	?	?	?	Other Database Import
A/NewYork/432/2000	flu	EPI85072	2000-01-05	north_america	usa	new_york	new_york	cell	?	?	?	Other Database Import
A/NewYork/433/2000	flu	EPI83742	2000-01-05	north_america	usa	new_york	new_york	cell	?	?	?	Other Database Import
A/NewYork/175/2000	flu	EPI28555	2000-01-06	north_america	usa	new_york	new_york	cell	?	?	?	Other Database Import
A/Netherlands/3/2000	flu	EPI367057	2000-01-06	europe	netherlands	netherlands	netherlands	cell	?	?	?	Other Database Import
A/Taiwan/6/2000	flu	EPI606730	2000-01-07	china	taiwan	taiwan	taiwan	undetermined	?	?	?	Other Database Import
A/HongKong/CUHK20200/2000	flu	EPI161029	2000-01-07	china	hong_kong	hong_kong	hong_kong	undetermined	?	?	?	Other Database Import
A/HongKong/CUHK20173/2000	flu	EPI161027	2000-01-07	china	hong_kong	hong_kong	hong_kong	undetermined	?	?	?	Other Database Import
A/HongKong/CUHK20169/2000	flu	EPI161026	2000-01-07	china	hong_kong	hong_kong	hong_kong	undetermined	?	?	?	Other Database Import
A/NewYork/434/2000	flu	EPI83761	2000-01-09	north_america	usa	new_york	new_york	cell	?	?	?	Other Database Import
A/NewYork/435/2000	flu	EPI91827	2000-01-09	north_america	usa	new_york	new_york	cell	46y	female	?	Other Database Import
A/Korea/320/2000	flu	EPI609040	2000-01-09	japan_korea	south_korea	south_korea	south_korea	undetermined	?	?	?	Other Database Import
A/NewYork/436/2000	flu	EPI83780	2000-01-10	north_america	usa	new_york	new_york	cell	?	?	?	Other Database Import
A/HongKong/CUHK20292/2000	flu	EPI161033	2000-01-11	china	hong_kong	hong_kong	hong_kong	undetermined	?	?	?	Other Database Import
A/Netherlands/51/2000	flu	EPI541868	2000-01-11	europe	netherlands	netherlands	netherlands	cell	2y	female	Erasmus Medical Center	Erasmus Medical Center
A/HongKong/CUHK20294/2000	flu	EPI161034	2000-01-12	china	hong_kong	hong_kong	hong_kong	undetermined	?	?	?	Other Database Import
A/HongKong/CUHK20300/2000	flu	EPI161035	2000-01-12	china	hong_kong	hong_kong	hong_kong	undetermined	?	?	?	Other Database Import
A/NewYork/437/2000	flu	EPI83799	2000-01-12	north_america	usa	new_york	new_york	cell	?	?	?	Other Database Import
A/SouthAustralia/1/2000	flu	EPI607269	2000-01-14	oceania	australia	south_australia	south_australia	undetermined	?	?	?	Other Database Import
A/NewYork/158/2000	flu	EPI52492	2000-01-17	north_america	usa	new_york	new_york	cell	?	?	?	Other Database Import
A/Bangkok/27/2000	flu	EPI608637	2000-01-17	southeast_asia	thailand	bangkok	bangkok	undetermined	?	?	?	Other Database Import
A/NewYork/438/2000	flu	EPI83818	2000-01-18	north_america	usa	new_york	new_york	cell	?	?	?	Other Database Import
A/NewYork/165/2000	flu	EPI52871	2000-01-18	north_america	usa	new_york	new_york	cell	?	?	?	Other Database Import
A/NewYork/152/2000	flu	EPI53201	2000-01-18	north_america	usa	new_york	new_york	undetermined	?	?	?	Other Database Import
A/Ningxia/6/2000	flu	EPI360166	2000-01-19	china	china	ningxia	ningxia	undetermined	?	?	?	Other Database Import
A/Romania/175/2000	flu	EPI606170	2000-01-19	europe	romania	romania	romania	undetermined	?	?	?	Other Database Import
A/Texas/7/2000	flu	EPI608339	2000-01-19	north_america	usa	texas	texas	undetermined	?	?	?	Other Database Import
A/Canterbury/2/2000	flu	EPI29177	2000-01-20	oceania	new_zealand	canterbury	canterbury	cell	?	?	?	Other Database Import
A/Dunedin/1/2000	flu	EPI37372	2000-01-21	oceania	new_zealand	otago	dunedin	undetermined	?	?	?	Other Database Import
A/NewYork/439/2000	flu	EPI84217	2000-01-23	north_america	usa	new_york	new_york	cell	?	?	?	Other Database Import
A/NewYork/440/2000	flu	EPI85091	2000-01-24	north_america	usa	new_york	new_york	cell	?	?	?	Other Database Import
A/NewYork/154/2000	flu	EPI28327	2000-01-24	north_america	usa	new_york	new_york	cell	?	?	?	Other Database Import
A/NewYork/187/2000	flu	EPI53745	2000-01-27	north_america	usa	new_york	new_york	cell	?	?	?	Other Database Import
A/NewYork/150/2000	flu	EPI27985	2000-01-28	north_america	usa	new_york	new_york	cell	?	?	?	Other Database Import
A/Bulgaria/874/2000	flu	EPI608598	2000-01-31	europe	bulgaria	bulgaria	bulgaria	undetermined	?	?	?	Other Database Import
A/Bulgaria/113/2000	flu	EPI609623	2000-01-31	europe	bulgaria	bulgaria	bulgaria	undetermined	?	?	?	Other Database Import
A/Bangkok/62/2000	flu	EPI607383	2000-02-01	southeast_asia	thailand	bangkok	bangkok	undetermined	?	?	?	Other Database Import
A/NewYork/173/2000	flu	EPI28517	2000-02-02	north_america	usa	new_york	new_york	cell	?	?	?	Other Database Import
A/Netherlands/197/2000	flu	EPI541872	2000-02-03	europe	netherlands	netherlands	netherlands	cell	6m	male	?	Erasmus Medical Center
A/NelsonMarlborough/1/2000	flu	EPI29196	2000-02-04	oceania	new_zealand	nelson	nelson	cell	?	?	?	Other Database Import
A/HongKong/CUHK21124/2000	flu	EPI161040	2000-02-04	china	hong_kong	hong_kong	hong_kong	undetermined	?	?	?	Other Database Import
A/NewYork/142/2000	flu	EPI54088	2000-02-06	north_america	usa	new_york	new_york	cell	?	?	?	Other Database Import
A/HongKong/CUHK21128/2000	flu	EPI161041	2000-02-06	china	hong_kong	hong_kong	hong_kong	undetermined	?	?	?	Other Database Import
A/HongKong/CUHK21132/2000	flu	EPI161042	2000-02-07	china	hong_kong	hong_kong	hong_kong	undetermined	?	?	?	Other Database Import
A/Missouri/NHRC0001/2000	flu	EPI318472	2000-02-07	north_america	usa	missouri	missouri	unpassaged	?	?	?	Other Database Import
A/Michigan/17/2000	flu	EPI609565	2000-02-08	north_america	usa	michigan	michigan	undetermined	?	?	?	Other Database Import
A/NewYork/180/2000	flu	EPI52264	2000-02-09	north_america	usa	new_york	new_york	undetermined	?	?	?	Other Database Import
A/NewYork/162/2000	flu	EPI53460	2000-02-09	north_america	usa	new_york	new_york	cell	?	?	?	Other Database Import
A/NewYork/148/2000	flu	EPI52454	2000-02-09	north_america	usa	new_york	new_york	cell	?	?	?	Other Database Import
A/HongKong/CUHK21250/2000	flu	EPI161045	2000-02-09	china	hong_kong	hong_kong	hong_kong	undetermined	?	?	?	Other Database Import
A/Auckland/583/2000	flu	EPI68809	2000-02-12	oceania	new_zealand	auckland	auckland	cell	?	?	?	Other Database Import
A/Sydney/201/2000	flu	EPI608206	2000-02-12	oceania	australia	new_south_wales	sydney	undetermined	?	?	?	Other Database Import
A/Oslo/6391/2000	flu	EPI119261	2000-02-12	europe	norway	ostlandet	oslo	undetermined	?	?	?	Other Database Import
A/Guangzhou/98/2000	flu	EPI360164	2000-02-13	china	china	guangdong	guangzhou	undetermined	?	?	?	Other Database Import
A/Guangzhou/100/2000	flu	EPI607051	2000-02-14	china	china	guangdong	guangzhou	undetermined	?	?	?	Other Database Import
A/Kiev/633/2000	flu	EPI607135	2000-02-15	europe	ukraine	kiev	kiev	undetermined	?	?	?	Other Database Import
A/Brisbane/3/2000	flu	EPI606082	2000-02-18	oceania	australia	queensland	brisbane	undetermined	?	?	?	Other Database Import
A/NewYork/182/2000	flu	EPI53536	2000-02-18	north_america	usa	new_york	new_york	cell	?	?	?	Other Database Import
A/Romania/387/2000	flu	EPI609661	2000-02-18	europe	romania	romania	romania	undetermined	?	?	?	Other Database Import
A/Dunedin/3/2000	flu	EPI39175	2000-02-21	oceania	new_zealand	otago	dunedin	undetermined	?	?	?	Other Database Import
A/Perth/213/2000	flu	EPI605979	2000-02-22	oceania	australia	western_australia	perth	undetermined	?	?	?	Other Database Import
A/Guangzhou/194/2000	flu	EPI360174	2000-02-28	china	china	guangdong	guangzhou	undetermined	?	?	?	Other Database Import
A/NewYork/178/2000	flu	EPI52530	2000-02-29	north_america	usa	new_york	new_york	cell	?	?	?	Other Database Import
A/HongKong/CUHK22072/2000	flu	EPI161059	2000-03-01	china	hong_kong	hong_kong	hong_kong	undetermined	?	?	?	Other Database Import
A/Perth/1/2000	flu	EPI608190	2000-03-01	oceania	australia	western_australia	perth	undetermined	?	?	?	Other Database Import
A/NewYork/176/2000	flu	EPI28574	2000-03-01	north_america	usa	new_york	new_york	cell	?	?	?	Other Database Import
A/HongKong/CUHK22087/2000	flu	EPI161061	2000-03-02	china	hong_kong	hong_kong	hong_kong	undetermined	?	?	?	Other Database Import
A/HongKong/CUHK22078/2000	flu	EPI161060	2000-03-02	china	hong_kong	hong_kong	hong_kong	undetermined	?	?	?	Other Database Import
A/HongKong/CUHK22162/2000	flu	EPI161062	2000-03-04	china	hong_kong	hong_kong	hong_kong	undetermined	?	?	?	Other Database Import
A/HongKong/CUHK22163/2000	flu	EPI161063	2000-03-05	china	hong_kong	hong_kong	hong_kong	undetermined	?	?	?	Other Database Import
A/Romania/427/2000	flu	EPI608512	2000-03-06	europe	romania	romania	romania	undetermined	?	?	?	Other Database Import
A/Guangzhou/81/2000	flu	EPI607036	2000-03-09	china	china	guangdong	guangzhou	undetermined	?	?	?	Other Database Import
A/Singapore/2/2000	flu	EPI609527	2000-03-10	southeast_asia	singapore	singapore	singapore	undetermined	?	?	?	Other Database Import
A/Shenzhen/195/2000	flu	EPI608664	2000-03-13	china	china	guangdong	shenzhen	undetermined	?	?	?	Other Database Import
A/Guangzhou/229/2000	flu	EPI360244	2000-03-14	china	china	guangdong	guangzhou	undetermined	?	?	?	Other Database Import
A/Guangzhou/253/2000	flu	EPI609072	2000-03-23	china	china	guangdong	guangzhou	undetermined	?	?	?	Other Database Import
A/Bangkok/178/2000	flu	EPI607052	2000-03-28	southeast_asia	thailand	bangkok	bangkok	undetermined	?	?	?	Other Database Import
A/Taiwan/206/2000	flu	EPI607308	2000-03-30	china	taiwan	taiwan	taiwan	undetermined	?	?	?	Other Database Import
A/Sydney/118/2000	flu	EPI115354	2000-04-09	oceania	australia	new_south_wales	sydney	cell	?	?	?	Other Database Import
A/Brazil/694/2000	flu	EPI606690	2000-04-12	south_america	brazil	brazil	brazil	undetermined	?	?	?	Other Database Import
A/Taiwan/1459/2000	flu	EPI606020	2000-04-17	china	taiwan	taiwan	taiwan	undetermined	?	?	?	Other Database Import
A/Brazil/718/2000	flu	EPI608535	2000-04-18	south_america	brazil	brazil	brazil	undetermined	?	?	?	Other Database Import
A/Guangzhou/375/2000	flu	EPI360243	2000-04-25	china	china	guangdong	guangzhou	undetermined	?	?	?	Other Database Import
A/Bangkok/202/2000	flu	EPI609004	2000-05-02	southeast_asia	thailand	bangkok	bangkok	undetermined	?	?	?	Other Database Import
A/Canterbury/3/2000	flu	EPI29139	2000-05-05	oceania	new_zealand	canterbury	canterbury	cell	?	?	?	Other Database Import
A/Darwin/1/2000	flu	EPI609709	2000-05-05	oceania	australia	northern_territory	darwin	undetermined	?	?	?	Other Database Import
A/Auckland/600/2000	flu	EPI64125	2000-05-06	oceania	new_zealand	auckland	auckland	cell	?	?	?	Other Database Import
A/Korea/2623/2000	flu	EPI607441	2000-05-10	japan_korea	south_korea	south_korea	south_korea	undetermined	?	?	?	Other Database Import
A/Guangzhou/438/2000	flu	EPI606968	2000-05-16	china	china	guangdong	guangzhou	undetermined	?	?	?	Other Database Import
A/Guangzhou/442/2000	flu	EPI360173	2000-05-18	china	china	guangdong	guangzhou	undetermined	?	?	?	Other Database Import
A/Guangzhou/443/2000	flu	EPI608989	2000-05-19	china	china	guangdong	guangzhou	undetermined	?	?	?	Other Database Import
A/Shenzhen/499/2000	flu	EPI609537	2000-05-22	china	china	guangdong	shenzhen	undetermined	?	?	?	Other Database Import
A/Guangdong/233/2000	flu	EPI608506	2000-06-05	china	china	guangdong	guangdong	undetermined	?	?	?	Other Database Import
A/SouthAfrica/40/2000	flu	EPI115319	2000-06-06	africa	south_africa	south_africa	south_africa	cell	?	?	?	Other Database Import
A/Guangzhou/536/2000	flu	EPI605929	2000-06-08	china	china	guangdong	guangzhou	undetermined	?	?	?	Other Database Import
A/Guangzhou/535/2000	flu	EPI609659	2000-06-08	china	china	guangdong	guangzhou	undetermined	?	?	?	Other Database Import
A/HongKong/1399/2000	flu	EPI608091	2000-06-10	china	hong_kong	hong_kong	hong_kong	undetermined	?	?	?	Other Database Import
A/Chile/5299/2000	flu	EPI606418	2000-06-11	south_america	chile	chile	chile	undetermined	?	?	?	Other Database Import
A/India/2701/2000	flu	EPI608389	2000-06-12	south_asia	india	india	india	undetermined	?	?	?	Other Database Import
A/Brazil/991/2000	flu	EPI606877	2000-06-12	south_america	brazil	brazil	brazil	undetermined	?	?	?	Other Database Import
A/Santiago/5628/2000	flu	EPI606281	2000-06-15	south_america	chile	santiago	santiago	undetermined	?	?	?	Other Database Import
A/HongKong/1418/2000	flu	EPI607476	2000-06-19	china	hong_kong	hong_kong	hong_kong	undetermined	?	?	?	Other Database Import
A/Brazil/2c/2000	flu	EPI607196	2000-07-05	south_america	brazil	brazil	brazil	undetermined	?	?	?	Other Database Import
A/Brazil/4b/2000	flu	EPI608511	2000-07-06	south_america	brazil	brazil	brazil	undetermined	?	?	?	Other Database Import
A/Santiago/6774/2000	flu	EPI606268	2000-07-11	south_america	chile	santiago	santiago	undetermined	?	?	?	Other Database Import
A/Taiwan/263/2000	flu	EPI444660	2000-07-14	china	taiwan	taiwan	taiwan	cell	?	?	?	Other Database Import
A/Brazil/18a/2000	flu	EPI608302	2000-07-14	south_america	brazil	brazil	brazil	undetermined	?	?	?	Other Database Import
A/Queensland/2/2000	flu	EPI48682	2000-07-16	oceania	australia	queensland	queensland	cell	?	?	?	Other Database Import
A/HongKong/1585/2000	flu	EPI609245	2000-07-19	china	hong_kong	hong_kong	hong_kong	undetermined	?	?	?	Other Database Import
A/HongKong/CUHK26805/2000	flu	EPI161088	2000-07-22	china	hong_kong	hong_kong	hong_kong	undetermined	?	?	?	Other Database Import
A/Brazil/10/2000	flu	EPI606813	2000-07-24	south_america	brazil	brazil	brazil	undetermined	?	?	?	Other Database Import
A/HongKong/CUHK26846/2000	flu	EPI161089	2000-07-25	china	hong_kong	hong_kong	hong_kong	undetermined	?	?	?	Other Database Import
A/Brisbane/10/2000	flu	EPI606817	2000-07-25	oceania	australia	queensland	brisbane	undetermined	?	?	?	Other Database Import
A/Fujian/151/2000	flu	EPI360170	2000-07-27	china	china	fujian	fujian	undetermined	?	?	?	Other Database Import
A/HongKong/CUHK26907/2000	flu	EPI161090	2000-07-27	china	hong_kong	hong_kong	hong_kong	undetermined	?	?	?	Other Database Import
A/HongKong/1573/2000	flu	EPI609594	2000-07-27	china	hong_kong	hong_kong	hong_kong	undetermined	?	?	?	Other Database Import
A/HongKong/CUHK26969/2000	flu	EPI161091	2000-07-29	china	hong_kong	hong_kong	hong_kong	undetermined	?	?	?	Other Database Import
A/HongKong/CUHK26980/2000	flu	EPI161092	2000-07-30	china	hong_kong	hong_kong	hong_kong	undetermined	?	?	?	Other Database Import
A/India/3783/2000	flu	EPI609286	2000-07-31	south_asia	india	india	india	undetermined	?	?	?	Other Database Import
A/Sydney/217/2000	flu	EPI609690	2000-08-01	oceania	australia	new_south_wales	sydney	undetermined	?	?	?	Other Database Import
A/Shenzhen/805/2000	flu	EPI360180	2000-08-01	china	china	guangdong	shenzhen	undetermined	?	?	?	Other Database Import
A/Canterbury/50/2000	flu	EPI57080	2000-08-02	oceania	new_zealand	canterbury	canterbury	cell	?	?	?	Other Database Import
A/Sydney/213/2000	flu	EPI608639	2000-08-02	oceania	australia	new_south_wales	sydney	undetermined	?	?	?	Other Database Import
A/HongKong/CUHK27157/2000	flu	EPI161093	2000-08-05	china	hong_kong	hong_kong	hong_kong	undetermined	?	?	?	Other Database Import
A/HongKong/CUHK27183/2000	flu	EPI161094	2000-08-06	china	hong_kong	hong_kong	hong_kong	undetermined	?	?	?	Other Database Import
A/Canterbury/17/2000	flu	EPI96124	2000-08-07	oceania	new_zealand	canterbury	canterbury	cell	?	?	?	Other Database Import
A/Victoria/523/2000	flu	EPI607081	2000-08-08	oceania	australia	victoria	victoria	undetermined	?	?	?	Other Database Import
A/Waikato/1/2000	flu	EPI34959	2000-08-09	oceania	new_zealand	waikato	waikato	undetermined	?	?	?	Other Database Import
A/HongKong/CUHK27348/2000	flu	EPI161095	2000-08-11	china	hong_kong	hong_kong	hong_kong	undetermined	?	?	?	Other Database Import
A/HongKong/CUHK27374/2000	flu	EPI161096	2000-08-12	china	hong_kong	hong_kong	hong_kong	undetermined	?	?	?	Other Database Import
A/Queensland/5/2000	flu	EPI48720	2000-08-13	oceania	australia	queensland	queensland	cell	?	?	?	Other Database Import
A/Victoria/544/2002	flu	EPI237912	2000-08-15	oceania	australia	victoria	victoria	undetermined	?	?	?	Other Database Import
A/Brisbane/11/2000	flu	EPI608178	2000-08-18	oceania	australia	queensland	brisbane	undetermined	?	?	?	Other Database Import
A/Townsville/4/2000	flu	EPI608730	2000-08-21	oceania	australia	queensland	townsville	undetermined	?	?	?	Other Database Import
A/Victoria/532/2000	flu	EPI608319	2000-08-22	oceania	australia	victoria	victoria	undetermined	?	?	?	Other Database Import
A/Wellington/9/2000	flu	EPI33660	2000-08-22	oceania	new_zealand	wellington	wellington	undetermined	?	?	?	Other Database Import
A/Perth/10/2000	flu	EPI609387	2000-08-23	oceania	australia	western_australia	perth	undetermined	?	?	?	Other Database Import
A/Canterbury/42/2000	flu	EPI95323	2000-08-25	oceania	new_zealand	canterbury	canterbury	cell	?	?	?	Other Database Import
A/Canterbury/39/2000	flu	EPI95342	2000-08-27	oceania	new_zealand	canterbury	canterbury	cell	?	?	?	Other Database Import
A/Canterbury/38/2000	flu	EPI96143	2000-08-27	oceania	new_zealand	canterbury	canterbury	cell	?	?	?	Other Database Import
A/Waikato/4/2000	flu	EPI37391	2000-08-28	oceania	new_zealand	waikato	waikato	undetermined	?	?	?	Other Database Import
A/Queensland/9/2000	flu	EPI48758	2000-08-28	oceania	australia	queensland	queensland	cell	?	?	?	Other Database Import
A/Waikato/5/2000	flu	EPI35833	2000-08-30	oceania	new_zealand	waikato	waikato	undetermined	?	?	?	Other Database Import
A/HongKong/CUHK28040/2000	flu	EPI161098	2000-09-03	china	hong_kong	hong_kong	hong_kong	undetermined	?	?	?	Other Database Import
A/HongKong/CUHK28038/2000	flu	EPI161097	2000-09-03	china	hong_kong	hong_kong	hong_kong	undetermined	?	?	?	Other Database Import
A/Shenzhen/882/2000	flu	EPI606501	2000-09-03	china	china	guangdong	shenzhen	undetermined	?	?	?	Other Database Import
A/Canterbury/62/2000	flu	EPI33762	2000-09-04	oceania	new_zealand	canterbury	canterbury	cell	?	?	?	Other Database Import
A/Hiroshima/253/2000	flu	EPI607525	2000-09-04	japan_korea	japan	hiroshima	hiroshima	undetermined	?	?	?	Other Database Import
A/Canterbury/55/2000	flu	EPI29215	2000-09-04	oceania	new_zealand	canterbury	canterbury	cell	?	?	?	Other Database Import
A/HongKong/CUHK28044/2000	flu	EPI161099	2000-09-04	china	hong_kong	hong_kong	hong_kong	undetermined	?	?	?	Other Database Import
A/Canterbury/56/2000	flu	EPI96770	2000-09-04	oceania	new_zealand	canterbury	canterbury	cell	?	?	?	Other Database Import
A/Queensland/3/2000	flu	EPI48701	2000-09-04	oceania	australia	queensland	queensland	cell	?	?	?	Other Database Import
A/Queensland/4/2000	flu	EPI48264	2000-09-05	oceania	australia	queensland	queensland	cell	?	?	?	Other Database Import
A/Canterbury/61/2000	flu	EPI29291	2000-09-06	oceania	new_zealand	canterbury	canterbury	cell	?	?	?	Other Database Import
A/Canterbury/64/2000	flu	EPI29234	2000-09-06	oceania	new_zealand	canterbury	canterbury	cell	?	?	?	Other Database Import
A/Waikato/6/2000	flu	EPI38398	2000-09-08	oceania	new_zealand	waikato	waikato	undetermined	?	?	?	Other Database Import
A/Canterbury/68/2000	flu	EPI96789	2000-09-08	oceania	new_zealand	canterbury	canterbury	cell	?	?	?	Other Database Import
A/Waikato/7/2000	flu	EPI37410	2000-09-08	oceania	new_zealand	waikato	waikato	undetermined	?	?	?	Other Database Import
A/Canterbury/67/2000	flu	EPI29272	2000-09-08	oceania	new_zealand	canterbury	canterbury	cell	?	?	?	Other Database Import
A/Canterbury/66/2000	flu	EPI96808	2000-09-09	oceania	new_zealand	canterbury	canterbury	cell	?	?	?	Other Database Import
A/Taiwan/16/2000	flu	EPI606967	2000-09-09	china	taiwan	taiwan	taiwan	undetermined	?	?	?	Other Database Import
A/HongKong/CUHK28278/2000	flu	EPI161100	2000-09-10	china	hong_kong	hong_kong	hong_kong	undetermined	?	?	?	Other Database Import
A/Auckland/601/2000	flu	EPI64144	2000-09-11	oceania	new_zealand	auckland	auckland	cell	?	?	?	Other Database Import
A/WesternAustralia/7/2000	flu	EPI48435	2000-09-11	oceania	australia	western_australia	western_australia	cell	?	?	?	Other Database Import
A/WesternAustralia/1/2000	flu	EPI48397	2000-09-12	oceania	australia	western_australia	western_australia	cell	?	?	?	Other Database Import
A/WesternAustralia/3/2000	flu	EPI44480	2000-09-12	oceania	australia	western_australia	western_australia	cell	?	?	?	Other Database Import
A/Canterbury/71/2000	flu	EPI96827	2000-09-14	oceania	new_zealand	canterbury	canterbury	cell	?	?	?	Other Database Import
A/Canterbury/75/2000	flu	EPI46212	2000-09-14	oceania	new_zealand	canterbury	canterbury	cell	?	?	?	Other Database Import
A/Queensland/1/2000	flu	EPI48245	2000-09-15	oceania	australia	queensland	queensland	cell	?	?	?	Other Database Import
A/Canterbury/73/2000	flu	EPI96162	2000-09-15	oceania	new_zealand	canterbury	canterbury	cell	?	?	?	Other Database Import
A/HongKong/CUHK28501/2000	flu	EPI161101	2000-09-16	china	hong_kong	hong_kong	hong_kong	undetermined	?	?	?	Other Database Import
A/Waikato/8/2000	flu	EPI45791	2000-09-18	oceania	new_zealand	waikato	waikato	undetermined	?	?	?	Other Database Import
A/Waikato/9/2000	flu	EPI38417	2000-09-19	oceania	new_zealand	waikato	waikato	undetermined	?	?	?	Other Database Import
A/Queensland/7/2000	flu	EPI49732	2000-09-19	oceania	australia	queensland	queensland	cell	?	?	?	Other Database Import
A/Wellington/21/2000	flu	EPI57099	2000-09-19	oceania	new_zealand	wellington	wellington	undetermined	?	?	?	Other Database Import
A/WesternAustralia/4/2000	flu	EPI62333	2000-09-20	oceania	australia	western_australia	western_australia	cell	?	?	?	Other Database Import
A/Queensland/8/2000	flu	EPI48739	2000-09-20	oceania	australia	queensland	queensland	cell	?	?	?	Other Database Import
A/WesternAustralia/2/2000	flu	EPI44461	2000-09-20	oceania	australia	western_australia	western_australia	cell	?	?	?	Other Database Import
A/Hutt/82/2000	flu	EPI96922	2000-09-21	oceania	new_zealand	wellington	hutt	cell	?	?	?	Other Database Import
A/Waikato/15/2000	flu	EPI39194	2000-09-21	oceania	new_zealand	waikato	waikato	undetermined	?	?	?	Other Database Import
A/Canterbury/80/2000	flu	EPI96846	2000-09-21	oceania	new_zealand	canterbury	canterbury	cell	?	?	?	Other Database Import
A/Canterbury/81/2000	flu	EPI96865	2000-09-21	oceania	new_zealand	canterbury	canterbury	cell	?	?	?	Other Database Import
A/Auckland/599/2000	flu	EPI64106	2000-09-22	oceania	new_zealand	auckland	auckland	cell	?	?	?	Other Database Import
A/Waikato/17/2000	flu	EPI39227	2000-09-22	oceania	new_zealand	waikato	waikato	undetermined	?	?	?	Other Database Import
A/Canterbury/85/2000	flu	EPI96903	2000-09-22	oceania	new_zealand	canterbury	canterbury	cell	?	?	?	Other Database Import
A/Peru/5937/2000	flu	EPI606368	2000-09-22	south_america	peru	peru	peru	undetermined	?	?	?	Other Database Import
A/Canterbury/84/2000	flu	EPI96884	2000-09-23	oceania	new_zealand	canterbury	canterbury	cell	?	?	?	Other Database Import
A/Auckland/588/2000	flu	EPI62916	2000-09-25	oceania	new_zealand	auckland	auckland	cell	?	?	?	Other Database Import
A/WesternAustralia/5/2000	flu	EPI48416	2000-09-25	oceania	australia	western_australia	western_australia	cell	?	?	?	Other Database Import
A/Waikato/16/2000	flu	EPI39208	2000-09-27	oceania	new_zealand	waikato	waikato	undetermined	?	?	?	Other Database Import
A/Auckland/589/2000	flu	EPI64030	2000-09-28	oceania	new_zealand	auckland	auckland	cell	?	?	?	Other Database Import
A/Taiwan/17/2000	flu	EPI606261	2000-09-29	china	taiwan	taiwan	taiwan	undetermined	?	?	?	Other Database Import
A/Canterbury/88/2000	flu	EPI96181	2000-10-02	oceania	new_zealand	canterbury	canterbury	cell	?	?	?	Other Database Import
A/SouthAfrica/96/2000	flu	EPI115329	2000-10-02	africa	south_africa	south_africa	south_africa	cell	?	?	?	Other Database Import
A/Argentina/5995/2000	flu	EPI608403	2000-10-03	south_america	argentina	argentina	argentina	undetermined	?	?	?	Other Database Import
A/Canterbury/89/2000	flu	EPI96941	2000-10-03	oceania	new_zealand	canterbury	canterbury	cell	?	?	?	Other Database Import
A/WesternAustralia/6/2000	flu	EPI363700	2000-10-04	oceania	australia	western_australia	western_australia	cell	?	male	?	Other Database Import
A/Canterbury/90/2000	flu	EPI97036	2000-10-07	oceania	new_zealand	canterbury	canterbury	cell	?	?	?	Other Database Import
A/WesternAustralia/9/2000	flu	EPI48454	2000-10-08	oceania	australia	western_australia	western_australia	cell	?	?	?	Other Database Import
A/Auckland/598/2000	flu	EPI68866	2000-10-09	oceania	new_zealand	auckland	auckland	cell	?	?	?	Other Database Import
A/Auckland/593/2000	flu	EPI62954	2000-10-09	oceania	new_zealand	auckland	auckland	cell	?	?	?	Other Database Import
A/Waikato/20/2000	flu	EPI38436	2000-10-09	oceania	new_zealand	waikato	waikato	undetermined	?	?	?	Other Database Import
A/WesternAustralia/12/2000	flu	EPI46440	2000-10-11	oceania	australia	western_australia	western_australia	cell	?	?	?	Other Database Import
A/Perth/41/2000	flu	EPI608984	2000-10-11	oceania	australia	western_australia	perth	undetermined	?	?	?	Other Database Import
A/Canterbury/92/2000	flu	EPI29120	2000-10-12	oceania	new_zealand	canterbury	canterbury	cell	?	?	?	Other Database Import
A/WesternAustralia/11/2000	flu	EPI44518	2000-10-14	oceania	australia	western_australia	western_australia	cell	?	?	?	Other Database Import
A/Canterbury/93/2000	flu	EPI96960	2000-10-16	oceania	new_zealand	canterbury	canterbury	cell	?	?	?	Other Database Import
A/WesternAustralia/8/2000	flu	EPI44499	2000-10-17	oceania	australia	western_australia	western_australia	cell	?	?	?	Other Database Import
A/Christchurch/94/2000	flu	EPI606292	2000-10-19	oceania	new_zealand	canterbury	christchurch	undetermined	?	?	?	Other Database Import
A/WesternAustralia/10/2000	flu	EPI46421	2000-10-19	oceania	australia	western_australia	western_australia	cell	?	?	?	Other Database Import
A/Canterbury/94/2000	flu	EPI29804	2000-10-20	oceania	new_zealand	canterbury	canterbury	cell	?	?	?	Other Database Import
A/Canterbury/98/2000	flu	EPI97017	2000-10-20	oceania	new_zealand	canterbury	canterbury	cell	?	?	?	Other Database Import
A/Canterbury/97/2000	flu	EPI36935	2000-10-25	oceania	new_zealand	canterbury	canterbury	cell	?	?	?	Other Database Import
A/Canterbury/96/2000	flu	EPI29101	2000-10-25	oceania	new_zealand	canterbury	canterbury	cell	?	?	?	Other Database Import
A/Canterbury/99/2000	flu	EPI96200	2000-10-27	oceania	new_zealand	canterbury	canterbury	cell	?	?	?	Other Database Import
A/Auckland/596/2000	flu	EPI64087	2000-10-30	oceania	new_zealand	auckland	auckland	cell	?	?	?	Other Database Import
A/Canterbury/101/2000	flu	EPI96998	2000-10-31	oceania	new_zealand	canterbury	canterbury	cell	?	?	?	Other Database Import
A/Victoria/570/2000	flu	EPI609288	2000-11-01	oceania	australia	victoria	victoria	undetermined	?	?	?	Other Database Import
A/Wellington/30/2000	flu	EPI40429	2000-11-25	oceania	new_zealand	wellington	wellington	undetermined	?	?	?	Other Database Import
A/Canterbury/103/2000	flu	EPI96979	2000-11-29	oceania	new_zealand	canterbury	canterbury	cell	?	?	?	Other Database Import
A/HongKong/CUHK52247/2000	flu	EPI161173	2000-12-08	china	hong_kong	hong_kong	hong_kong	undetermined	?	?	?	Other Database Import
A/Niigata/2743/2000	flu	EPI607182	2000-12-13	japan_korea	japan	niigata	niigata	undetermined	?	?	?	Other Database Import
A/Taiwan/431/2000	flu	EPI444661	2000-12-22	china	taiwan	taiwan	taiwan	cell	?	?	?	Other Database Import
A/Taiwan/1471/2000	flu	EPI609065	2000-12-24	china	taiwan	taiwan	taiwan	undetermined	?	?	?	Other Database Import
A/Yokohama/111/2000	flu	EPI609383	2000-12-25	japan_korea	japan	kanagawa	yokohama	undetermined	?	?	?	Other Database Import
A/Singapore/94/2000	flu	EPI609586	2000-12-29	southeast_asia	singapore	singapore	singapore	undetermined	?	?	?	Other Database Import
A/Singapore/4/2001	flu	EPI609685	2001-01-03	southeast_asia	singapore	singapore	singapore	undetermined	?	?	?	Other Database Import
A/Singapore/15/2001	flu	EPI347440	2001-01-08	southeast_asia	singapore	singapore	singapore	cell	?	?	Who Collaborating Centre For Reference And Research On Influenza	National Institute For Medical Research
A/Nara/3/2001	flu	EPI608695	2001-01-10	japan_korea	japan	nara	nara	undetermined	?	?	?	Other Database Import
A/Osaka/68/2001	flu	EPI609120	2001-01-10	japan_korea	japan	osaka	osaka	undetermined	?	?	?	Other Database Import
A/Okinawa/5/2001	flu	EPI173332	2001-01-11	japan_korea	japan	okinawa	okinawa	undetermined	?	?	?	Other Database Import
A/Bulgaria/28/2001	flu	EPI607071	2001-01-15	europe	bulgaria	bulgaria	bulgaria	undetermined	?	?	?	Other Database Import
A/Kentucky/21/2001	flu	EPI606345	2001-01-19	north_america	usa	kentucky	kentucky	undetermined	?	?	?	Other Database Import
A/NewYork/301/2001	flu	EPI82906	2001-01-21	north_america	usa	new_york	new_york	cell	?	?	?	Other Database Import
A/Busan/11/2001	flu	EPI254114	2001-01-22	japan_korea	south_korea	busan	busan	undetermined	?	?	?	Other Database Import
A/Hiroshima/1/2001	flu	EPI606500	2001-01-23	japan_korea	japan	hiroshima	hiroshima	undetermined	?	?	?	Other Database Import
A/Jochiwon/4/2001	flu	EPI254270	2001-01-26	japan_korea	south_korea	daejeon	jochiwon	undetermined	?	?	?	Other Database Import
A/Bangkok/28/2001	flu	EPI609735	2001-01-29	southeast_asia	thailand	bangkok	bangkok	undetermined	?	?	?	Other Database Import
A/Osaka/125/2001	flu	EPI606674	2001-02-01	japan_korea	japan	osaka	osaka	undetermined	?	?	?	Other Database Import
A/Taiwan/1/2001	flu	EPI608997	2001-02-02	china	taiwan	taiwan	taiwan	undetermined	?	?	?	Other Database Import
A/Taiwan/22104/2001	flu	EPI609472	2001-02-04	china	taiwan	taiwan	taiwan	undetermined	?	?	?	Other Database Import
A/Taiwan/92605/2001	flu	EPI606459	2001-02-04	china	taiwan	taiwan	taiwan	undetermined	?	?	?	Other Database Import
A/Florida/1/2001	flu	EPI609256	2001-02-05	north_america	usa	florida	florida	undetermined	?	?	?	Other Database Import
A/Massachusetts/2/2001	flu	EPI607003	2001-02-07	north_america	usa	massachusetts	massachusetts	undetermined	?	?	?	Other Database Import
A/Busan/66/2001	flu	EPI608304	2001-02-08	japan_korea	south_korea	busan	busan	undetermined	?	?	?	Other Database Import
A/Busan/16/2001	flu	EPI254115	2001-02-08	japan_korea	south_korea	busan	busan	undetermined	?	?	?	Other Database Import
A/NorthCarolina/1/2001	flu	EPI609682	2001-02-11	north_america	usa	north_carolina	north_carolina	undetermined	?	?	?	Other Database Import
A/Daegu/24/2001	flu	EPI254143	2001-02-12	japan_korea	south_korea	daegu	daegu	undetermined	?	?	?	Other Database Import
A/Taiwan/55/2001	flu	EPI444662	2001-02-12	china	taiwan	taiwan	taiwan	cell	?	?	?	Other Database Import
A/Nepal/g-2079/2001	flu	EPI607477	2001-02-20	south_asia	nepal	nepal	nepal	undetermined	?	?	?	Other Database Import
A/Busan/71/2001	flu	EPI254117	2001-02-22	japan_korea	south_korea	busan	busan	undetermined	?	?	?	Other Database Import
A/Busan/44/2001	flu	EPI254116	2001-02-22	japan_korea	south_korea	busan	busan	undetermined	?	?	?	Other Database Import
A/Okinawa/54/2001	flu	EPI173333	2001-02-28	japan_korea	japan	okinawa	okinawa	undetermined	?	?	?	Other Database Import
A/HongKong/CUHK13033/2001	flu	EPI160989	2001-03-05	china	hong_kong	hong_kong	hong_kong	undetermined	?	?	?	Other Database Import
A/Bangkok/86/2001	flu	EPI608579	2001-03-05	southeast_asia	thailand	bangkok	bangkok	undetermined	?	?	?	Other Database Import
A/Daegu/58/2001	flu	EPI254149	2001-03-06	japan_korea	south_korea	daegu	daegu	undetermined	?	?	?	Other Database Import
A/HongKong/CUHK13048/2001	flu	EPI160990	2001-03-06	china	hong_kong	hong_kong	hong_kong	undetermined	?	?	?	Other Database Import
A/HongKong/CUHK13172/2001	flu	EPI160992	2001-03-07	china	hong_kong	hong_kong	hong_kong	undetermined	?	?	?	Other Database Import
A/Daegu/56/2001	flu	EPI254148	2001-03-10	japan_korea	south_korea	daegu	daegu	undetermined	?	?	?	Other Database Import
A/Victoria/302/2001	flu	EPI609631	2001-03-13	oceania	australia	victoria	victoria	undetermined	?	?	?	Other Database Import
A/Fukushima/127/2001	flu	EPI606706	2001-03-14	japan_korea	japan	fukushima	fukushima	undetermined	?	?	?	Other Database Import
A/Netherlands/118/2001	flu	EPI362908	2001-03-14	europe	netherlands	netherlands	netherlands	cell	76y	female	?	Other Database Import
A/Shiga/2/2001	flu	EPI608224	2001-03-15	japan_korea	japan	shiga	shiga	undetermined	?	?	?	Other Database Import
A/HongKong/CUHK13510/2001	flu	EPI161000	2001-03-16	china	hong_kong	hong_kong	hong_kong	undetermined	?	?	?	Other Database Import
A/Sendai/161/2001	flu	EPI606621	2001-03-16	japan_korea	japan	miyagi	sendai	undetermined	?	?	?	Other Database Import
A/SouthAustralia/44/2001	flu	EPI606549	2001-03-19	oceania	australia	south_australia	south_australia	undetermined	?	?	?	Other Database Import
A/Netherlands/124/2001	flu	EPI367065	2001-03-20	europe	netherlands	netherlands	netherlands	cell	?	?	?	Other Database Import
A/HongKong/CUHK13658/2001	flu	EPI161002	2001-03-20	china	hong_kong	hong_kong	hong_kong	undetermined	?	?	?	Other Database Import
A/Bangkok/115/2001	flu	EPI608541	2001-03-26	southeast_asia	thailand	bangkok	bangkok	undetermined	?	?	?	Other Database Import
A/Okinawa/92/2001	flu	EPI173334	2001-03-27	japan_korea	japan	okinawa	okinawa	undetermined	?	?	?	Other Database Import
A/Tak/123/2001	flu	EPI607123	2001-03-29	southeast_asia	thailand	tak	tak	undetermined	?	?	?	Other Database Import
A/Indonesia/8338/2001	flu	EPI606664	2001-04-04	southeast_asia	indonesia	indonesia	indonesia	undetermined	?	?	?	Other Database Import
A/HongKong/CUHK21226/2001	flu	EPI161044	2001-04-04	china	hong_kong	hong_kong	hong_kong	undetermined	?	?	?	Other Database Import
A/Sydney/2/2001	flu	EPI606969	2001-04-06	oceania	australia	new_south_wales	sydney	undetermined	?	?	?	Other Database Import
A/Yamagata/592/2001	flu	EPI607000	2001-04-06	japan_korea	japan	yamagata	yamagata	undetermined	?	?	?	Other Database Import
A/HongKong/CUHK21421/2001	flu	EPI161047	2001-04-11	china	hong_kong	hong_kong	hong_kong	undetermined	?	?	?	Other Database Import
A/Taiwan/124/2001	flu	EPI444663	2001-04-14	china	taiwan	taiwan	taiwan	cell	?	?	?	Other Database Import
A/Canterbury/6/2001	flu	EPI31133	2001-04-17	oceania	new_zealand	canterbury	canterbury	cell	?	?	?	Other Database Import
A/HongKong/CUHK21675/2001	flu	EPI161049	2001-04-20	china	hong_kong	hong_kong	hong_kong	undetermined	?	?	?	Other Database Import
A/HongKong/CUHK21734/2001	flu	EPI161052	2001-04-21	china	hong_kong	hong_kong	hong_kong	undetermined	?	?	?	Other Database Import
A/HongKong/CUHK21733/2001	flu	EPI161051	2001-04-21	china	hong_kong	hong_kong	hong_kong	undetermined	?	?	?	Other Database Import
A/Bangkok/156/2001	flu	EPI609339	2001-04-23	southeast_asia	thailand	bangkok	bangkok	undetermined	?	?	?	Other Database Import
A/Bangkok/161/2001	flu	EPI608193	2001-04-24	southeast_asia	thailand	bangkok	bangkok	undetermined	?	?	?	Other Database Import
A/Toulouse/878/2001	flu	EPI397686	2001-04-25	europe	france	languedoc_roussillon_midi_pyrenees	toulouse	cell	2y	?	Crr Virus Influenza Region Sud	National Institute For Medical Research
A/Waikato/1/2001	flu	EPI35852	2001-04-25	oceania	new_zealand	waikato	waikato	undetermined	?	?	?	Other Database Import
A/HongKong/CUHK21891/2001	flu	EPI161054	2001-04-26	china	hong_kong	hong_kong	hong_kong	undetermined	?	?	?	Other Database Import
A/HongKong/CUHK21932/2001	flu	EPI161055	2001-04-27	china	hong_kong	hong_kong	hong_kong	undetermined	?	?	?	Other Database Import
A/Perth/204/2001	flu	EPI608083	2001-05-02	oceania	australia	western_australia	perth	undetermined	?	?	?	Other Database Import
A/Taiwan/160/2001	flu	EPI444664	2001-05-07	china	taiwan	taiwan	taiwan	cell	?	?	?	Other Database Import
A/Canterbury/7/2001	flu	EPI30203	2001-05-09	oceania	new_zealand	canterbury	canterbury	cell	?	?	?	Other Database Import
A/Ecuador/2635/2001	flu	EPI606007	2001-05-14	south_america	ecuador	ecuador	ecuador	undetermined	?	?	?	Other Database Import
A/Waikato/5/2001	flu	EPI38455	2001-05-15	oceania	new_zealand	waikato	waikato	undetermined	?	?	?	Other Database Import
A/Chile/5109/2001	flu	EPI606131	2001-05-17	south_america	chile	chile	chile	undetermined	?	?	?	Other Database Import
A/Madagascar/62645/2001	flu	EPI347425	2001-05-19	africa	madagascar	madagascar	madagascar	cell	37y	?	Institut Pasteur De Madagascar	National Institute For Medical Research
A/HongKong/CUHK22644/2001	flu	EPI161067	2001-05-21	china	hong_kong	hong_kong	hong_kong	undetermined	?	?	?	Other Database Import
A/HongKong/648/2001	flu	EPI607465	2001-05-25	china	hong_kong	hong_kong	hong_kong	undetermined	?	?	?	Other Database Import
A/Shimane/133/2001	flu	EPI609363	2001-05-28	japan_korea	japan	shimane	shimane	undetermined	?	?	?	Other Database Import
A/HongKong/CUHK22888/2001	flu	EPI161069	2001-05-28	china	hong_kong	hong_kong	hong_kong	undetermined	?	?	?	Other Database Import
A/HongKong/734/2001	flu	EPI347427	2001-06-01	china	hong_kong	hong_kong	hong_kong	cell	?	?	Government Virus Unit	National Institute For Medical Research
A/Chile/5823/2001	flu	EPI609536	2001-06-04	south_america	chile	chile	chile	undetermined	?	?	?	Other Database Import
A/Tak/214/2001	flu	EPI609003	2001-06-05	southeast_asia	thailand	tak	tak	undetermined	?	?	?	Other Database Import
A/Argentina/5/2001	flu	EPI606746	2001-06-06	south_america	argentina	argentina	argentina	undetermined	?	?	?	Other Database Import
A/Brazil/695/2001	flu	EPI609420	2001-06-06	south_america	brazil	brazil	brazil	undetermined	?	?	?	Other Database Import
A/HongKong/762/2001	flu	EPI608425	2001-06-06	china	hong_kong	hong_kong	hong_kong	undetermined	?	?	?	Other Database Import
A/Canterbury/10/2001	flu	EPI29823	2001-06-07	oceania	new_zealand	canterbury	canterbury	cell	?	?	?	Other Database Import
A/Bangkok/226/2001	flu	EPI609434	2001-06-11	southeast_asia	thailand	bangkok	bangkok	undetermined	?	?	?	Other Database Import
A/Bangkok/224/2001	flu	EPI606681	2001-06-12	southeast_asia	thailand	bangkok	bangkok	undetermined	?	?	?	Other Database Import
A/Dakar/26/2001	flu	EPI347426	2001-06-12	africa	senegal	dakar	dakar	cell	4y	?	Institut Pasteur De Dakar	National Institute For Medical Research
A/Argentina/mc5/2001	flu	EPI609218	2001-06-14	south_america	argentina	argentina	argentina	undetermined	?	?	?	Other Database Import
A/Argentina/13/2001	flu	EPI609282	2001-06-22	south_america	argentina	argentina	argentina	undetermined	?	?	?	Other Database Import
A/Argentina/10/2001	flu	EPI608177	2001-06-25	south_america	argentina	argentina	argentina	undetermined	?	?	?	Other Database Import
A/Brazil/822/2001	flu	EPI608720	2001-06-26	south_america	brazil	brazil	brazil	undetermined	?	?	?	Other Database Import
A/Argentina/25/2001	flu	EPI606255	2001-06-29	south_america	argentina	argentina	argentina	undetermined	?	?	?	Other Database Import
A/Argentina/44/2001	flu	EPI607384	2001-06-29	south_america	argentina	argentina	argentina	undetermined	?	?	?	Other Database Import
A/WestCoast/32/2001	flu	EPI29842	2001-07-03	oceania	new_zealand	west_coast	west_coast	cell	?	?	?	Other Database Import
A/Singapore/41/2001	flu	EPI608684	2001-07-03	southeast_asia	singapore	singapore	singapore	undetermined	?	?	?	Other Database Import
A/WestCoast/28/2001	flu	EPI30222	2001-07-04	oceania	new_zealand	west_coast	west_coast	cell	?	?	?	Other Database Import
A/Christchurch/28/2001	flu	EPI606520	2001-07-04	oceania	new_zealand	canterbury	christchurch	undetermined	?	?	?	Other Database Import
A/Canterbury/36/2001	flu	EPI32558	2001-07-06	oceania	new_zealand	canterbury	canterbury	cell	?	?	?	Other Database Import
A/Canterbury/37/2001	flu	EPI29861	2001-07-09	oceania	new_zealand	canterbury	canterbury	cell	?	?	?	Other Database Import
A/Christchurch/37/2001	flu	EPI609687	2001-07-09	oceania	new_zealand	canterbury	christchurch	undetermined	?	?	?	Other Database Import
A/Wellington/22/2001	flu	EPI35016	2001-07-09	oceania	new_zealand	wellington	wellington	cell	?	?	?	Other Database Import
A/Canterbury/44/2001	flu	EPI29880	2001-07-11	oceania	new_zealand	canterbury	canterbury	cell	?	?	?	Other Database Import
A/Canterbury/43/2001	flu	EPI30241	2001-07-11	oceania	new_zealand	canterbury	canterbury	cell	?	?	?	Other Database Import
A/WesternAustralia/13/2001	flu	EPI44537	2001-07-11	oceania	australia	western_australia	western_australia	cell	?	?	?	Other Database Import
A/Okinawa/184/2001	flu	EPI173335	2001-07-11	japan_korea	japan	okinawa	okinawa	undetermined	?	?	?	Other Database Import
A/Bangkok/328/2001	flu	EPI606953	2001-07-12	southeast_asia	thailand	bangkok	bangkok	undetermined	?	?	?	Other Database Import
A/Christchurch/44/2001	flu	EPI608362	2001-07-12	oceania	new_zealand	canterbury	christchurch	undetermined	?	?	?	Other Database Import
A/Canterbury/50/2001	flu	EPI30260	2001-07-12	oceania	new_zealand	canterbury	canterbury	cell	?	?	?	Other Database Import
A/WestCoast/55/2001	flu	EPI29899	2001-07-13	oceania	new_zealand	west_coast	west_coast	cell	?	?	?	Other Database Import
A/Queensland/19/2001	flu	EPI49751	2001-07-14	oceania	australia	queensland	queensland	cell	?	?	?	Other Database Import
A/HongKong/CUHK24510/2001	flu	EPI161082	2001-07-15	china	hong_kong	hong_kong	hong_kong	undetermined	?	?	?	Other Database Import
A/SouthAustralia/53/2001	flu	EPI545310	2001-07-17	oceania	australia	south_australia	south_australia	cell	?	?	?	Other Database Import
A/Singapore/45/2001	flu	EPI607499	2001-07-19	southeast_asia	singapore	singapore	singapore	undetermined	?	?	?	Other Database Import
A/HongKong/CUHK24749/2001	flu	EPI161083	2001-07-19	china	hong_kong	hong_kong	hong_kong	undetermined	?	?	?	Other Database Import
A/HongKong/CUHK24760/2001	flu	EPI161084	2001-07-20	china	hong_kong	hong_kong	hong_kong	undetermined	?	?	?	Other Database Import
A/HongKong/CUHK24825/2001	flu	EPI161085	2001-07-22	china	hong_kong	hong_kong	hong_kong	undetermined	?	?	?	Other Database Import
A/HongKong/CUHK24882/2001	flu	EPI161086	2001-07-23	china	hong_kong	hong_kong	hong_kong	undetermined	?	?	?	Other Database Import
A/HongKong/CUHK24985/2001	flu	EPI161087	2001-07-26	china	hong_kong	hong_kong	hong_kong	undetermined	?	?	?	Other Database Import
A/Vietnam/1249/2001	flu	EPI607297	2001-07-28	southeast_asia	vietnam	vietnam	vietnam	undetermined	?	?	?	Other Database Import
A/Victoria/508/2001	flu	EPI607076	2001-07-30	oceania	australia	victoria	victoria	undetermined	?	?	?	Other Database Import
A/Vietnam/1293/2001	flu	EPI606054	2001-08-01	southeast_asia	vietnam	vietnam	vietnam	undetermined	?	?	?	Other Database Import
A/Chile/6416/2001	flu	EPI106474	2001-08-03	south_america	chile	chile	chile	undetermined	?	?	?	Other Database Import
A/Victoria/509/2001	flu	EPI606440	2001-08-03	oceania	australia	victoria	victoria	undetermined	?	?	?	Other Database Import
A/Queensland/20/2001	flu	EPI48872	2001-08-05	oceania	australia	queensland	queensland	cell	?	?	?	Other Database Import
A/HongKong/CUHK33316/2001	flu	EPI161115	2001-08-06	china	hong_kong	hong_kong	hong_kong	undetermined	?	?	?	Other Database Import
A/Canterbury/146/2001	flu	EPI30905	2001-08-06	oceania	new_zealand	canterbury	canterbury	cell	?	?	?	Other Database Import
A/HongKong/CUHK33406/2001	flu	EPI161116	2001-08-08	china	hong_kong	hong_kong	hong_kong	undetermined	?	?	?	Other Database Import
A/Argentina/302/2001	flu	EPI607233	2001-08-09	south_america	argentina	argentina	argentina	undetermined	?	?	?	Other Database Import
A/HongKong/CUHK33418/2001	flu	EPI161118	2001-08-09	china	hong_kong	hong_kong	hong_kong	undetermined	?	?	?	Other Database Import
A/HongKong/CUHK33416/2001	flu	EPI161117	2001-08-09	china	hong_kong	hong_kong	hong_kong	undetermined	?	?	?	Other Database Import
A/Canterbury/140/2001	flu	EPI30279	2001-08-10	oceania	new_zealand	canterbury	canterbury	cell	?	?	?	Other Database Import
A/Argentina/311/2001	flu	EPI608586	2001-08-10	south_america	argentina	argentina	argentina	undetermined	?	?	?	Other Database Import
A/Queensland/11/2001	flu	EPI48777	2001-08-11	oceania	australia	queensland	queensland	cell	?	?	?	Other Database Import
A/Canterbury/149/2001	flu	EPI29918	2001-08-13	oceania	new_zealand	canterbury	canterbury	cell	?	?	?	Other Database Import
A/Auckland/607/2001	flu	EPI62162	2001-08-15	oceania	new_zealand	auckland	auckland	cell	?	?	?	Other Database Import
A/Queensland/16/2001	flu	EPI48834	2001-08-17	oceania	australia	queensland	queensland	cell	?	?	?	Other Database Import
A/Auckland/602/2001	flu	EPI62973	2001-08-19	oceania	new_zealand	auckland	auckland	cell	?	?	?	Other Database Import
A/Queensland/12/2001	flu	EPI48796	2001-08-24	oceania	australia	queensland	queensland	cell	?	?	?	Other Database Import
A/Queensland/18/2001	flu	EPI48853	2001-08-24	oceania	australia	queensland	queensland	cell	?	?	?	Other Database Import
A/Queensland/17/2001	flu	EPI49119	2001-08-24	oceania	australia	queensland	queensland	cell	?	?	?	Other Database Import
A/HongKong/1251/2001	flu	EPI609200	2001-08-25	china	hong_kong	hong_kong	hong_kong	undetermined	?	?	?	Other Database Import
A/Colombia/3026/2001	flu	EPI608998	2001-08-27	south_america	colombia	colombia	colombia	undetermined	?	?	?	Other Database Import
A/Wellington/34/2001	flu	EPI36650	2001-08-28	oceania	new_zealand	wellington	wellington	undetermined	?	?	?	Other Database Import
A/Argentina/3759/2001	flu	EPI606677	2001-08-29	south_america	argentina	argentina	argentina	undetermined	?	?	?	Other Database Import
A/HongKong/1269/2001	flu	EPI608094	2001-08-29	china	hong_kong	hong_kong	hong_kong	undetermined	?	?	?	Other Database Import
A/HongKong/CUHK34114/2001	flu	EPI161125	2001-08-30	china	hong_kong	hong_kong	hong_kong	undetermined	?	?	?	Other Database Import
A/NongKhai/475/2001	flu	EPI606431	2001-08-30	southeast_asia	thailand	nong_khai	nong_khai	undetermined	?	?	?	Other Database Import
A/Argentina/3758/2001	flu	EPI609422	2001-08-30	south_america	argentina	argentina	argentina	undetermined	?	?	?	Other Database Import
A/Thailand/80891/2001	flu	EPI609644	2001-09-02	southeast_asia	thailand	thailand	thailand	undetermined	?	?	?	Other Database Import
A/Queensland/14/2001	flu	EPI54648	2001-09-03	oceania	australia	queensland	queensland	cell	?	?	?	Other Database Import
A/Bangkok/480/2001	flu	EPI609482	2001-09-03	southeast_asia	thailand	bangkok	bangkok	undetermined	?	?	?	Other Database Import
A/Guangzhou/1166/2001	flu	EPI360188	2001-09-07	china	china	guangdong	guangzhou	undetermined	?	?	?	Other Database Import
A/SouthAustralia/71/2001	flu	EPI609143	2001-09-08	oceania	australia	south_australia	south_australia	undetermined	?	?	?	Other Database Import
A/Shanghai/159/2001	flu	EPI360184	2001-09-09	china	china	shanghai	shanghai	undetermined	?	?	?	Other Database Import
A/Philippines/78890/2001	flu	EPI606260	2001-09-12	southeast_asia	philippines	philippines	philippines	undetermined	?	?	?	Other Database Import
A/Waikato/105/2001	flu	EPI36669	2001-09-13	oceania	new_zealand	waikato	waikato	cell	?	?	?	Other Database Import
A/WesternAustralia/15/2001	flu	EPI38797	2001-09-13	oceania	australia	western_australia	western_australia	cell	?	?	?	Other Database Import
A/SouthAustralia/75/2001	flu	EPI606502	2001-09-13	oceania	australia	south_australia	south_australia	undetermined	?	?	?	Other Database Import
A/SouthAustralia/84/2001	flu	EPI607495	2001-09-14	oceania	australia	south_australia	south_australia	undetermined	?	?	?	Other Database Import
A/SouthAustralia/85/2001	flu	EPI606646	2001-09-17	oceania	australia	south_australia	south_australia	undetermined	?	?	?	Other Database Import
A/Bangkok/504/2001	flu	EPI606297	2001-09-18	southeast_asia	thailand	bangkok	bangkok	undetermined	?	?	?	Other Database Import
A/Guangzhou/1191/2001	flu	EPI606040	2001-09-20	china	china	guangdong	guangzhou	undetermined	?	?	?	Other Database Import
A/Texas/8/2001	flu	EPI606683	2001-09-24	north_america	usa	texas	texas	undetermined	?	?	?	Other Database Import
A/Arizona/9/2001	flu	EPI608321	2001-09-25	north_america	usa	arizona	arizona	undetermined	?	?	?	Other Database Import
A/WesternAustralia/16/2001	flu	EPI44575	2001-09-25	oceania	australia	western_australia	western_australia	cell	?	?	?	Other Database Import
A/Darwin/17/2001	flu	EPI609012	2001-09-26	oceania	australia	northern_territory	darwin	undetermined	?	?	?	Other Database Import
A/WesternAustralia/14/2001	flu	EPI44556	2001-09-26	oceania	australia	western_australia	western_australia	cell	?	?	?	Other Database Import
A/Singapore/54/2001	flu	EPI609380	2001-09-26	southeast_asia	singapore	singapore	singapore	undetermined	?	?	?	Other Database Import
A/Auckland/604/2001	flu	EPI64182	2001-09-28	oceania	new_zealand	auckland	auckland	cell	?	?	?	Other Database Import
A/Florida/6/2001	flu	EPI606720	2001-10-02	north_america	usa	florida	florida	undetermined	?	?	?	Other Database Import
A/WesternAustralia/17/2001	flu	EPI44594	2001-10-02	oceania	australia	western_australia	western_australia	cell	?	?	?	Other Database Import
A/NewYork/45/2001	flu	EPI608336	2001-10-02	north_america	usa	new_york	new_york	undetermined	?	?	?	Other Database Import
A/Auckland/603/2001	flu	EPI64163	2001-10-02	oceania	new_zealand	auckland	auckland	cell	?	?	?	Other Database Import
A/SouthAustralia/98/2001	flu	EPI607268	2001-10-04	oceania	australia	south_australia	south_australia	undetermined	?	?	?	Other Database Import
A/Singapore/60/2001	flu	EPI609032	2001-10-10	southeast_asia	singapore	singapore	singapore	undetermined	?	?	?	Other Database Import
A/Brazil/79214/2001	flu	EPI606048	2001-10-11	south_america	brazil	brazil	brazil	undetermined	?	?	?	Other Database Import
A/Guangzhou/1237/2001	flu	EPI360248	2001-10-14	china	china	guangdong	guangzhou	undetermined	?	?	?	Other Database Import
A/Alaska/7/2001	flu	EPI605927	2001-10-16	north_america	usa	alaska	alaska	undetermined	?	?	?	Other Database Import
A/Okinawa/207/2001	flu	EPI606313	2001-10-22	japan_korea	japan	okinawa	okinawa	undetermined	?	?	?	Other Database Import
A/Brazil/79285/2001	flu	EPI609367	2001-10-22	south_america	brazil	brazil	brazil	undetermined	?	?	?	Other Database Import
A/Okinawa/208/2001	flu	EPI173336	2001-10-23	japan_korea	japan	okinawa	okinawa	undetermined	?	?	?	Other Database Import
A/Alaska/8/2001	flu	EPI606907	2001-10-25	north_america	usa	alaska	alaska	undetermined	?	?	?	Other Database Import
A/Texas/9/2001	flu	EPI607390	2001-10-26	north_america	usa	texas	texas	undetermined	?	?	?	Other Database Import
A/SouthAustralia/102/2001	flu	EPI606850	2001-10-29	oceania	australia	south_australia	south_australia	undetermined	?	?	?	Other Database Import
A/Louisiana/1/2001	flu	EPI606686	2001-10-30	north_america	usa	louisiana	louisiana	undetermined	?	?	?	Other Database Import
A/HongKong/CUHK50080/2001	flu	EPI161155	2001-11-08	china	hong_kong	hong_kong	hong_kong	undetermined	?	?	?	Other Database Import
A/Perth/270/2001	flu	EPI606866	2001-11-13	oceania	australia	western_australia	perth	undetermined	?	?	?	Other Database Import
A/Wuhan/375/2001	flu	EPI360197	2001-11-14	china	china	hubei	wuhan	undetermined	?	?	?	Other Database Import
A/Wuhan/374/2001	flu	EPI607328	2001-11-15	china	china	hubei	wuhan	undetermined	?	?	?	Other Database Import
A/NewYork/46/2001	flu	EPI606786	2001-11-17	north_america	usa	new_york	new_york	undetermined	?	?	?	Other Database Import
A/Beijing/157/2001	flu	EPI606561	2001-11-20	china	china	beijing	beijing	undetermined	?	?	?	Other Database Import
A/Wuhan/388/2001	flu	EPI360194	2001-11-20	china	china	hubei	wuhan	undetermined	?	?	?	Other Database Import
A/Guangzhou/1348/2001	flu	EPI360249	2001-11-20	china	china	guangdong	guangzhou	undetermined	?	?	?	Other Database Import
A/NewYork/401/2001	flu	EPI83343	2001-11-21	north_america	usa	new_york	new_york	cell	?	?	?	Other Database Import
A/NewYork/71/2001	flu	EPI28023	2001-11-22	north_america	usa	new_york	new_york	cell	?	?	?	Other Database Import
A/NewYork/55/2001	flu	EPI236577	2001-11-22	north_america	usa	new_york	new_york	undetermined	?	?	?	Other Database Import
A/Wisconsin/14/2001	flu	EPI609290	2001-11-23	north_america	usa	wisconsin	wisconsin	undetermined	?	?	?	Other Database Import
A/Alaska/21/2001	flu	EPI606637	2001-11-23	north_america	usa	alaska	alaska	undetermined	?	?	?	Other Database Import
A/NewYork/124/2001	flu	EPI27605	2001-11-27	north_america	usa	new_york	new_york	cell	?	?	?	Other Database Import
A/Wuhan/396/2001	flu	EPI173709	2001-11-29	china	china	hubei	wuhan	cell	?	?	?	Centers For Disease Control And Prevention
A/Beijing/161/2001	flu	EPI608499	2001-11-30	china	china	beijing	beijing	undetermined	?	?	?	Other Database Import
A/Beijing/144/2001	flu	EPI608976	2001-11-30	china	china	beijing	beijing	undetermined	?	?	?	Other Database Import
A/Beijing/159/2001	flu	EPI607296	2001-11-30	china	china	beijing	beijing	undetermined	?	?	?	Other Database Import
A/Bcm/1/2001	flu	EPI360972	2001-11-30	north_america	usa	texas	baylor	cell	?	?	?	Other Database Import
A/Alaska/14/2001	flu	EPI609689	2001-12-02	north_america	usa	alaska	alaska	undetermined	?	?	?	Other Database Import
A/Wisconsin/17/2001	flu	EPI608380	2001-12-02	north_america	usa	wisconsin	wisconsin	undetermined	?	?	?	Other Database Import
A/Taiwan/384/2001	flu	EPI444665	2001-12-04	china	taiwan	taiwan	taiwan	cell	?	?	?	Other Database Import
A/Wuhan/397/2001	flu	EPI360193	2001-12-05	china	china	hubei	wuhan	undetermined	?	?	?	Other Database Import
A/Peru/G194/2001	flu	EPI609732	2001-12-05	south_america	peru	peru	peru	undetermined	?	?	?	Other Database Import
A/Wuhan/401/2001	flu	EPI607538	2001-12-06	china	china	hubei	wuhan	undetermined	?	?	?	Other Database Import
A/Beijing/20/2001	flu	EPI360223	2001-12-06	china	china	beijing	beijing	undetermined	?	?	?	Other Database Import
A/Texas/12/2001	flu	EPI606727	2001-12-06	north_america	usa	texas	texas	undetermined	?	?	?	Other Database Import
A/Beijing/17/2001	flu	EPI360222	2001-12-06	china	china	beijing	beijing	undetermined	?	?	?	Other Database Import
A/Osaka/1803/2001	flu	EPI607347	2001-12-08	japan_korea	japan	osaka	osaka	undetermined	?	?	?	Other Database Import
A/SouthDakota/1/2001	flu	EPI608493	2001-12-11	north_america	usa	south_dakota	south_dakota	undetermined	?	?	?	Other Database Import
A/Washington/7/2001	flu	EPI609493	2001-12-11	north_america	usa	washington	washington	undetermined	?	?	?	Other Database Import
A/NewYork/47/2001	flu	EPI606037	2001-12-11	north_america	usa	new_york	new_york	undetermined	?	?	?	Other Database Import
A/Fukushima/180/2001	flu	EPI606719	2001-12-12	japan_korea	japan	fukushima	fukushima	undetermined	?	?	?	Other Database Import
A/Vermont/1/2001	flu	EPI608365	2001-12-12	north_america	usa	vermont	vermont	undetermined	?	?	?	Other Database Import
A/NewJersey/4/2001	flu	EPI606571	2001-12-12	north_america	usa	new_jersey	new_jersey	undetermined	?	?	?	Other Database Import
A/Beijing/114/2001	flu	EPI606065	2001-12-13	china	china	beijing	beijing	undetermined	?	?	?	Other Database Import
A/Beijing/188/2001	flu	EPI605990	2001-12-13	china	china	beijing	beijing	undetermined	?	?	?	Other Database Import
A/NewYork/83/2001	flu	EPI27320	2001-12-15	north_america	usa	new_york	new_york	cell	?	?	?	Other Database Import
A/Henan/136/2001	flu	EPI360250	2001-12-15	china	china	henan	henan	undetermined	?	?	?	Other Database Import
A/Henan/142/2001	flu	EPI360182	2001-12-16	china	china	henan	henan	undetermined	?	?	?	Other Database Import
A/Liaoning/38/2001	flu	EPI360199	2001-12-17	china	china	liaoning	liaoning	undetermined	?	?	?	Other Database Import
A/Tianjin/217/2001	flu	EPI360191	2001-12-18	china	china	tianjin	tianjin	undetermined	?	?	?	Other Database Import
A/Maryland/8/2001	flu	EPI607542	2001-12-18	north_america	usa	maryland	maryland	undetermined	?	?	?	Other Database Import
A/Tianjin/221/2001	flu	EPI360187	2001-12-19	china	china	tianjin	tianjin	undetermined	?	?	?	Other Database Import
A/Kochi/499/2001	flu	EPI609516	2001-12-20	japan_korea	japan	kochi	kochi	undetermined	?	?	?	Other Database Import
A/NewYork/131/2001	flu	EPI27643	2001-12-23	north_america	usa	new_york	new_york	cell	?	?	?	Other Database Import
A/Shandong/27/2001	flu	EPI607312	2001-12-24	china	china	shandong	shandong	undetermined	?	?	?	Other Database Import
A/Wuhan/428/2001	flu	EPI360192	2001-12-25	china	china	hubei	wuhan	undetermined	?	?	?	Other Database Import
A/Tianjin/244/2001	flu	EPI360185	2001-12-25	china	china	tianjin	tianjin	undetermined	?	?	?	Other Database Import
A/Tianjin/252/2001	flu	EPI360252	2001-12-25	china	china	tianjin	tianjin	undetermined	?	?	?	Other Database Import
A/Tianjin/245/2001	flu	EPI360246	2001-12-25	china	china	tianjin	tianjin	undetermined	?	?	?	Other Database Import
A/NewYork/94/2001	flu	EPI53277	2001-12-25	north_america	usa	new_york	new_york	cell	?	?	?	Other Database Import
A/Okinawa/225/2001	flu	EPI173337	2001-12-25	japan_korea	japan	okinawa	okinawa	undetermined	?	?	?	Other Database Import
A/NewYork/82/2001	flu	EPI27529	2001-12-26	north_america	usa	new_york	new_york	cell	?	?	?	Other Database Import
A/HongKong/CUHK51431/2001	flu	EPI161169	2001-12-26	china	hong_kong	hong_kong	hong_kong	undetermined	?	?	?	Other Database Import
A/NewYork/77/2001	flu	EPI79616	2001-12-26	north_america	usa	new_york	new_york	cell	?	?	?	Other Database Import
A/NewYork/80/2001	flu	EPI28232	2001-12-26	north_america	usa	new_york	new_york	cell	?	?	?	Other Database Import
A/Wuhan/433/2001	flu	EPI360195	2001-12-26	china	china	hubei	wuhan	undetermined	?	?	?	Other Database Import
A/Gunma/178/2001	flu	EPI607512	2001-12-26	japan_korea	japan	gunma	gunma	undetermined	?	?	?	Other Database Import
A/Lyon/1407/2001	flu	EPI607382	2001-12-26	europe	france	auvergne_rhone_alpes	lyon	undetermined	?	?	?	Other Database Import
A/NewYork/402/2001	flu	EPI83362	2001-12-27	north_america	usa	new_york	new_york	cell	?	?	?	Other Database Import
A/Liaoning/34/2001	flu	EPI609123	2001-12-28	china	china	liaoning	liaoning	undetermined	?	?	?	Other Database Import
A/HongKong/CUHK51490/2001	flu	EPI161170	2001-12-28	china	hong_kong	hong_kong	hong_kong	undetermined	?	?	?	Other Database Import
A/NewYork/273/2001	flu	EPI54563	2001-12-29	north_america	usa	new_york	new_york	cell	?	?	?	Other Database Import
A/NewYork/84/2001	flu	EPI27358	2001-12-29	north_america	usa	new_york	new_york	cell	?	?	?	Other Database Import
A/Sydney/44/2001	flu	EPI608139	2001-12-30	oceania	australia	new_south_wales	sydney	undetermined	?	?	?	Other Database Import
A/NewYork/127/2001	flu	EPI28268	2001-12-31	north_america	usa	new_york	new_york	cell	?	?	?	Other Database Import
A/NewYork/85/2001	flu	EPI27795	2001-12-31	north_america	usa	new_york	new_york	cell	?	?	?	Other Database Import
A/Shenzhen/14/2002	flu	EPI360270	2002-01-01	china	china	guangdong	shenzhen	undetermined	?	?	?	Other Database Import
A/Hanoi/1872/2002	flu	EPI2506	2002-01-01	southeast_asia	vietnam	hanoi	hanoi	undetermined	?	?	?	Other Database Import
A/NewYork/275/2002	flu	EPI79160	2002-01-04	north_america	usa	new_york	new_york	cell	?	?	?	Other Database Import
A/NewYork/403/2002	flu	EPI83381	2002-01-04	north_america	usa	new_york	new_york	cell	?	?	?	Other Database Import
A/NewYork/134/2002	flu	EPI27928	2002-01-04	north_america	usa	new_york	new_york	cell	?	?	?	Other Database Import
A/Utah/6/2002	flu	EPI235675	2002-01-05	north_america	usa	utah	utah	undetermined	?	?	?	Other Database Import
A/Henan/1/2002	flu	EPI360258	2002-01-06	china	china	henan	henan	undetermined	?	?	?	Other Database Import
A/Texas/4/2002	flu	EPI235673	2002-01-06	north_america	usa	texas	texas	undetermined	?	?	?	Other Database Import
A/Shenzhen/37/2002	flu	EPI360271	2002-01-07	china	china	guangdong	shenzhen	undetermined	?	?	?	Other Database Import
A/Singapore/2/2002	flu	EPI607270	2002-01-07	southeast_asia	singapore	singapore	singapore	undetermined	?	?	?	Other Database Import
A/Kochi/3/2002	flu	EPI609371	2002-01-07	japan_korea	japan	kochi	kochi	undetermined	?	?	?	Other Database Import
A/Netherlands/1/2002	flu	EPI362922	2002-01-07	europe	netherlands	netherlands	netherlands	cell	?	?	?	Other Database Import
A/Hiroshima/66/2002	flu	EPI607090	2002-01-07	japan_korea	japan	hiroshima	hiroshima	undetermined	?	?	?	Other Database Import
A/Beijing/20/2002	flu	EPI608409	2002-01-07	china	china	beijing	beijing	undetermined	?	?	?	Other Database Import
A/Hubei/56/2002	flu	EPI360285	2002-01-08	china	china	hubei	hubei	undetermined	?	?	?	Other Database Import
A/NewYork/406/2002	flu	EPI83438	2002-01-08	north_america	usa	new_york	new_york	cell	?	?	?	Other Database Import
A/Tianjin/13/2002	flu	EPI609024	2002-01-08	china	china	tianjin	tianjin	undetermined	?	?	?	Other Database Import
A/Texas/1/2002	flu	EPI235672	2002-01-08	north_america	usa	texas	texas	undetermined	?	?	?	Other Database Import
A/NewYork/407/2002	flu	EPI84141	2002-01-08	north_america	usa	new_york	new_york	cell	?	?	?	Other Database Import
A/Victoria/103/2002	flu	EPI235678	2002-01-09	oceania	australia	victoria	victoria	undetermined	?	?	?	Other Database Import
A/Victoria/105/2002	flu	EPI235679	2002-01-09	oceania	australia	victoria	victoria	undetermined	?	?	?	Other Database Import
A/Hyogo/3/2002	flu	EPI606521	2002-01-09	japan_korea	japan	hyogo	hyogo	undetermined	?	?	?	Other Database Import
A/Beijing/44/2002	flu	EPI360225	2002-01-10	china	china	beijing	beijing	undetermined	?	?	?	Other Database Import
A/HongKong/CUHK5251/2002	flu	EPI161178	2002-01-10	china	hong_kong	hong_kong	hong_kong	undetermined	?	?	?	Other Database Import
A/Sichuan/8/2002	flu	EPI360288	2002-01-10	china	china	sichuan	sichuan	undetermined	?	?	?	Other Database Import
A/HongKong/CUHK5250/2002	flu	EPI161177	2002-01-10	china	hong_kong	hong_kong	hong_kong	undetermined	?	?	?	Other Database Import
A/Hebei/22/2002	flu	EPI609676	2002-01-10	china	china	hebei	hebei	undetermined	?	?	?	Other Database Import
A/Beijing/35/2002	flu	EPI360224	2002-01-11	china	china	beijing	beijing	undetermined	?	?	?	Other Database Import
A/Hubei/61/2002	flu	EPI606076	2002-01-12	china	china	hubei	hubei	undetermined	?	?	?	Other Database Import
A/Hubei/62/2002	flu	EPI360284	2002-01-12	china	china	hubei	hubei	undetermined	?	?	?	Other Database Import
A/Victoria/102/2003	flu	EPI1447605	2002-01-12	oceania	australia	victoria	victoria	cell	?	?	Victorian Infectious Diseases Reference Laboratory	Who Collaborating Centre For Reference And Research On Influenza
A/HongKong/CUHK5296/2002	flu	EPI161183	2002-01-12	china	hong_kong	hong_kong	hong_kong	undetermined	?	?	?	Other Database Import
A/Auckland/614/2002	flu	EPI62219	2002-01-14	oceania	new_zealand	auckland	auckland	cell	?	?	?	Other Database Import
A/NewYork/409/2002	flu	EPI83476	2002-01-14	north_america	usa	new_york	new_york	cell	?	?	?	Other Database Import
A/NewYork/125/2002	flu	EPI53897	2002-01-14	north_america	usa	new_york	new_york	cell	?	?	?	Other Database Import
A/Bcm/1/2002	flu	EPI359496	2002-01-14	north_america	usa	texas	baylor	cell	?	?	?	Other Database Import
A/Wuhan/16/2002	flu	EPI607568	2002-01-17	china	china	hubei	wuhan	undetermined	?	?	?	Other Database Import
A/Oslo/398/2002	flu	EPI235650	2002-01-17	europe	norway	ostlandet	oslo	undetermined	?	?	?	Other Database Import
A/NewYork/74/2002	flu	EPI53239	2002-01-19	north_america	usa	new_york	new_york	cell	?	?	?	Other Database Import
A/HongKong/1550/2002	flu	EPI606600	2002-01-19	china	hong_kong	hong_kong	hong_kong	undetermined	?	?	?	Other Database Import
A/NewYork/106/2002	flu	EPI28042	2002-01-20	north_america	usa	new_york	new_york	cell	?	?	?	Other Database Import
A/Fujian/28/2002	flu	EPI360227	2002-01-22	china	china	fujian	fujian	undetermined	?	?	?	Other Database Import
A/Texas/NHRC0001/2002	flu	EPI318664	2002-01-22	north_america	usa	texas	texas	unpassaged	?	?	?	Other Database Import
A/NewYork/99/2002	flu	EPI53068	2002-01-23	north_america	usa	new_york	new_york	cell	?	?	?	Other Database Import
A/NewYork/16/2002	flu	EPI147160	2002-01-23	north_america	usa	new_york	new_york	undetermined	?	?	?	Other Database Import
A/Ehime/47/2002	flu	EPI607451	2002-01-24	japan_korea	japan	ehime	ehime	undetermined	?	?	?	Other Database Import
A/Singapore/7/2002	flu	EPI608275	2002-01-24	southeast_asia	singapore	singapore	singapore	undetermined	?	?	?	Other Database Import
A/Guangzhou/77/2002	flu	EPI360233	2002-01-24	china	china	guangdong	guangzhou	undetermined	?	?	?	Other Database Import
A/NewYork/128/2002	flu	EPI27890	2002-01-25	north_america	usa	new_york	new_york	cell	?	?	?	Other Database Import
A/Connecticut/1/2002	flu	EPI147161	2002-01-25	north_america	usa	connecticut	connecticut	undetermined	?	?	?	Other Database Import
A/NewYork/132/2002	flu	EPI27909	2002-01-27	north_america	usa	new_york	new_york	cell	?	?	?	Other Database Import
A/Kumamoto/9/2002	flu	EPI606109	2002-01-29	japan_korea	japan	kumamoto	kumamoto	undetermined	?	?	?	Other Database Import
A/NewYork/112/2002	flu	EPI53650	2002-01-29	north_america	usa	new_york	new_york	cell	?	?	?	Other Database Import
A/Perth/201/2002	flu	EPI235654	2002-01-29	oceania	australia	western_australia	perth	undetermined	?	?	?	Other Database Import
A/Sapporo/32/2002	flu	EPI608573	2002-01-30	japan_korea	japan	hokkaido	sapporo	undetermined	?	?	?	Other Database Import
A/NewYork/118/2002	flu	EPI53669	2002-01-30	north_america	usa	new_york	new_york	cell	?	?	?	Other Database Import
A/Okinawa/16/2002	flu	EPI173338	2002-01-30	japan_korea	japan	okinawa	okinawa	undetermined	?	?	?	Other Database Import
A/NewYork/109/2002	flu	EPI28137	2002-01-30	north_america	usa	new_york	new_york	cell	?	?	?	Other Database Import
A/NewYork/113/2002	flu	EPI27434	2002-01-31	north_america	usa	new_york	new_york	cell	?	?	?	Other Database Import
A/NewYork/108/2002	flu	EPI28061	2002-01-31	north_america	usa	new_york	new_york	cell	?	?	?	Other Database Import
A/Waikato/2/2002	flu	EPI35871	2002-01-31	oceania	new_zealand	waikato	waikato	cell	?	?	?	Other Database Import
A/NewYork/412/2002	flu	EPI83533	2002-02-01	north_america	usa	new_york	new_york	cell	?	?	?	Other Database Import
A/Massachusetts/2/2002	flu	EPI147163	2002-02-01	north_america	usa	massachusetts	massachusetts	undetermined	?	?	?	Other Database Import
A/NewYork/117/2002	flu	EPI52397	2002-02-01	north_america	usa	new_york	new_york	cell	?	?	?	Other Database Import
A/NewYork/C4/2002	flu	EPI40196	2002-02-01	north_america	usa	new_york	new_york	cell	?	?	?	Other Database Import
A/Georgia/NHRC0001/2002	flu	EPI318672	2002-02-02	north_america	usa	georgia	georgia	unpassaged	?	?	?	Other Database Import
A/HongKong/CUHK6210/2002	flu	EPI161202	2002-02-03	china	hong_kong	hong_kong	hong_kong	undetermined	?	?	?	Other Database Import
A/HongKong/CUHK6206/2002	flu	EPI161201	2002-02-03	china	hong_kong	hong_kong	hong_kong	undetermined	?	?	?	Other Database Import
A/NewYork/111/2002	flu	EPI52719	2002-02-04	north_america	usa	new_york	new_york	cell	?	?	?	Other Database Import
A/NewYork/101/2002	flu	EPI53125	2002-02-04	north_america	usa	new_york	new_york	cell	?	?	?	Other Database Import
A/NewYork/18/2002	flu	EPI147164	2002-02-04	north_america	usa	new_york	new_york	undetermined	?	?	?	Other Database Import
A/NewYork/17/2002	flu	EPI147165	2002-02-04	north_america	usa	new_york	new_york	undetermined	?	?	?	Other Database Import
A/NewYork/105/2002	flu	EPI53182	2002-02-05	north_america	usa	new_york	new_york	cell	?	?	?	Other Database Import
A/NewYork/133/2002	flu	EPI27662	2002-02-06	north_america	usa	new_york	new_york	cell	?	?	?	Other Database Import
A/NewYork/90/2002	flu	EPI27852	2002-02-06	north_america	usa	new_york	new_york	cell	?	?	?	Other Database Import
A/NewYork/115/2002	flu	EPI28175	2002-02-07	north_america	usa	new_york	new_york	cell	?	?	?	Other Database Import
A/NewYork/413/2002	flu	EPI83552	2002-02-08	north_america	usa	new_york	new_york	cell	?	?	?	Other Database Import
A/Wellington/6/2002	flu	EPI35890	2002-02-10	oceania	new_zealand	wellington	wellington	cell	?	?	?	Other Database Import
A/NewYork/129/2002	flu	EPI27624	2002-02-12	north_america	usa	new_york	new_york	cell	?	?	?	Other Database Import
A/NewYork/75/2002	flu	EPI53593	2002-02-12	north_america	usa	new_york	new_york	cell	?	?	?	Other Database Import
A/NewYork/414/2002	flu	EPI83571	2002-02-12	north_america	usa	new_york	new_york	cell	?	?	?	Other Database Import
A/Akita/69/2002	flu	EPI608458	2002-02-12	japan_korea	japan	akita	akita	undetermined	?	?	?	Other Database Import
A/Illinois/NHRC0001/2002	flu	EPI318480	2002-02-13	north_america	usa	illinois	illinois	unpassaged	?	?	?	Other Database Import
A/NewYork/97/2002	flu	EPI53612	2002-02-13	north_america	usa	new_york	new_york	cell	?	?	?	Other Database Import
A/NewYork/135/2002	flu	EPI27681	2002-02-14	north_america	usa	new_york	new_york	cell	?	?	?	Other Database Import
A/Okinawa/31/2002	flu	EPI173339	2002-02-16	japan_korea	japan	okinawa	okinawa	undetermined	?	?	?	Other Database Import
A/Brisbane/3/2002	flu	EPI235587	2002-02-18	oceania	australia	queensland	brisbane	undetermined	?	?	?	Other Database Import
A/NewYork/120/2002	flu	EPI28365	2002-02-19	north_america	usa	new_york	new_york	cell	?	?	?	Other Database Import
A/NewYork/81/2002	flu	EPI53498	2002-02-19	north_america	usa	new_york	new_york	cell	?	?	?	Other Database Import
A/NewYork/93/2002	flu	EPI52700	2002-02-19	north_america	usa	new_york	new_york	cell	?	?	?	Other Database Import
A/Nouakchott/1/2002	flu	EPI347431	2002-02-19	africa	mauritania	nouakchott	nouakchott	cell	?	?	Institut Pasteur De Dakar	National Institute For Medical Research
A/NorthCarolina/6/2002	flu	EPI235645	2002-02-21	north_america	usa	north_carolina	north_carolina	undetermined	?	?	?	Other Database Import
A/NewYork/415/2002	flu	EPI83590	2002-02-22	north_america	usa	new_york	new_york	cell	?	?	?	Other Database Import
A/Fukuoka/15/2002	flu	EPI607551	2002-02-23	japan_korea	japan	fukuoka	fukuoka	undetermined	?	?	?	Other Database Import
A/Illinois/1/2002	flu	EPI147167	2002-02-24	north_america	usa	illinois	illinois	undetermined	?	?	?	Other Database Import
A/Morioka/34/2002	flu	EPI141345	2002-02-25	japan_korea	japan	iwate	morioka	undetermined	?	?	?	Other Database Import
A/NewYork/21/2002	flu	EPI147168	2002-02-25	north_america	usa	new_york	new_york	undetermined	?	?	?	Other Database Import
A/Indonesia/3277/2002	flu	EPI608367	2002-02-25	southeast_asia	indonesia	indonesia	indonesia	undetermined	?	?	?	Other Database Import
A/NewYork/88/2002	flu	EPI53049	2002-02-26	north_america	usa	new_york	new_york	cell	?	?	?	Other Database Import
A/NewYork/274/2002	flu	EPI54582	2002-02-26	north_america	usa	new_york	new_york	cell	?	?	?	Other Database Import
A/NewYork/20/2002	flu	EPI147169	2002-02-26	north_america	usa	new_york	new_york	undetermined	?	?	?	Other Database Import
A/NewYork/121/2002	flu	EPI27453	2002-02-26	north_america	usa	new_york	new_york	cell	?	?	?	Other Database Import
A/Sichuan/75/2002	flu	EPI360280	2002-02-26	china	china	sichuan	sichuan	undetermined	?	?	?	Other Database Import
A/NewYork/95/2002	flu	EPI27396	2002-02-26	north_america	usa	new_york	new_york	cell	?	?	?	Other Database Import
A/NewYork/22/2002	flu	EPI147170	2002-02-27	north_america	usa	new_york	new_york	undetermined	?	?	?	Other Database Import
A/NewYork/416/2002	flu	EPI83609	2002-02-28	north_america	usa	new_york	new_york	cell	?	?	?	Other Database Import
A/Morioka/52/2002	flu	EPI141346	2002-03-01	japan_korea	japan	iwate	morioka	undetermined	?	?	?	Other Database Import
A/HongKong/CUHK13216/2002	flu	EPI160993	2002-03-01	china	hong_kong	hong_kong	hong_kong	undetermined	?	?	?	Other Database Import
A/NewYork/126/2002	flu	EPI78723	2002-03-01	north_america	usa	new_york	new_york	cell	?	?	?	Other Database Import
A/NewYork/86/2002	flu	EPI27548	2002-03-01	north_america	usa	new_york	new_york	cell	?	?	?	Other Database Import
A/HongKong/CUHK13249/2002	flu	EPI160994	2002-03-03	china	hong_kong	hong_kong	hong_kong	undetermined	?	?	?	Other Database Import
A/Shenzhen/230/2002	flu	EPI360273	2002-03-03	china	china	guangdong	shenzhen	undetermined	?	?	?	Other Database Import
A/HongKong/CUHK13278/2002	flu	EPI160995	2002-03-04	china	hong_kong	hong_kong	hong_kong	undetermined	?	?	?	Other Database Import
A/Thailand/128400/2002	flu	EPI607545	2002-03-04	southeast_asia	thailand	thailand	thailand	undetermined	?	?	?	Other Database Import
A/Auckland/615/2002	flu	EPI64201	2002-03-04	oceania	new_zealand	auckland	auckland	cell	?	?	?	Other Database Import
A/NewYork/114/2002	flu	EPI28156	2002-03-05	north_america	usa	new_york	new_york	cell	?	?	?	Other Database Import
A/Hawaii/4/2002	flu	EPI235618	2002-03-05	north_america	usa	hawaii	hawaii	undetermined	?	?	?	Other Database Import
A/HongKong/121715/2002	flu	EPI608131	2002-03-06	china	hong_kong	hong_kong	hong_kong	undetermined	?	?	?	Other Database Import
A/NewYork/276/2002	flu	EPI78229	2002-03-07	north_america	usa	new_york	new_york	cell	?	?	?	Other Database Import
A/Songkhla/107/2002	flu	EPI609807	2002-03-08	southeast_asia	thailand	songkhla	songkhla	undetermined	?	?	?	Other Database Import
A/Shenzhen/146/2002	flu	EPI360211	2002-03-11	china	china	guangdong	shenzhen	undetermined	?	?	?	Other Database Import
A/NewYork/130/2002	flu	EPI28270	2002-03-11	north_america	usa	new_york	new_york	cell	?	?	?	Other Database Import
A/Okinawa/40/2002	flu	EPI173340	2002-03-12	japan_korea	japan	okinawa	okinawa	undetermined	?	?	?	Other Database Import
A/Fujian/72/2002	flu	EPI360283	2002-03-12	china	china	fujian	fujian	undetermined	?	?	?	Other Database Import
A/Taiwan/92/2002	flu	EPI444666	2002-03-17	china	taiwan	taiwan	taiwan	cell	?	?	?	Other Database Import
A/Bangkok/103/2002	flu	EPI608100	2002-03-19	southeast_asia	thailand	bangkok	bangkok	undetermined	?	?	?	Other Database Import
A/NewYork/136/2002	flu	EPI53441	2002-03-19	north_america	usa	new_york	new_york	cell	?	?	?	Other Database Import
A/NewYork/122/2002	flu	EPI53346	2002-03-21	north_america	usa	new_york	new_york	cell	?	?	?	Other Database Import
A/HongKong/568/2002	flu	EPI608770	2002-03-25	china	hong_kong	hong_kong	hong_kong	undetermined	?	?	?	Other Database Import
A/Bangkok/109/2002	flu	EPI608751	2002-03-25	southeast_asia	thailand	bangkok	bangkok	undetermined	?	?	?	Other Database Import
A/Kochi/160/2002	flu	EPI606360	2002-04-01	japan_korea	japan	kochi	kochi	undetermined	?	?	?	Other Database Import
A/Singapore/16/2002	flu	EPI609791	2002-04-02	southeast_asia	singapore	singapore	singapore	undetermined	?	?	?	Other Database Import
A/HongKong/CUHK21582/2002	flu	EPI161048	2002-04-02	china	hong_kong	hong_kong	hong_kong	undetermined	?	?	?	Other Database Import
A/Netherlands/311/2002	flu	EPI541884	2002-04-02	europe	netherlands	netherlands	netherlands	cell	11m	female	?	Erasmus Medical Center
A/Washington/3/2002	flu	EPI235693	2002-04-03	north_america	usa	washington	washington	undetermined	?	?	?	Other Database Import
A/HongKong/CUHK21713/2002	flu	EPI161050	2002-04-04	china	hong_kong	hong_kong	hong_kong	undetermined	?	?	?	Other Database Import
A/Ceara/177/2002	flu	EPI609798	2002-04-04	south_america	brazil	ceara	ceara	undetermined	?	?	?	Other Database Import
A/NewCaledonia/6/2002	flu	EPI235640	2002-04-04	oceania	new_caledonia	new_caledonia	new_caledonia	undetermined	?	?	?	Other Database Import
A/Mauritius/175/2002	flu	EPI347429	2002-04-05	africa	mauritius	mauritius	mauritius	cell	6y	male	Central Health Laboratory	National Institute For Medical Research
A/HongKong/CUHK21742/2002	flu	EPI161053	2002-04-08	china	hong_kong	hong_kong	hong_kong	undetermined	?	?	?	Other Database Import
A/Vietnam/HN187/2002	flu	EPI395124	2002-04-09	southeast_asia	vietnam	vietnam	vietnam	undetermined	?	?	?	Other Database Import
A/Canterbury/9/2002	flu	EPI95630	2002-04-11	oceania	new_zealand	canterbury	canterbury	cell	?	?	?	Other Database Import
A/HongKong/CUHK21957/2002	flu	EPI161056	2002-04-11	china	hong_kong	hong_kong	hong_kong	undetermined	?	?	?	Other Database Import
A/Waikato/5/2002	flu	EPI35035	2002-04-12	oceania	new_zealand	waikato	waikato	undetermined	?	?	?	Other Database Import
A/Canterbury/4/2002	flu	EPI95019	2002-04-12	oceania	new_zealand	canterbury	canterbury	cell	?	?	?	Other Database Import
A/Canterbury/5/2002	flu	EPI94069	2002-04-13	oceania	new_zealand	canterbury	canterbury	cell	?	?	?	Other Database Import
A/Guangzhou/353/2002	flu	EPI360234	2002-04-16	china	china	guangdong	guangzhou	undetermined	?	?	?	Other Database Import
A/Nebraska/12/2002	flu	EPI147177	2002-04-17	north_america	usa	nebraska	nebraska	undetermined	?	?	?	Other Database Import
A/Canterbury/6/2002	flu	EPI95611	2002-04-19	oceania	new_zealand	canterbury	canterbury	cell	?	?	?	Other Database Import
A/Canterbury/13/2002	flu	EPI95038	2002-04-19	oceania	new_zealand	canterbury	canterbury	cell	?	?	?	Other Database Import
A/Canterbury/10/2002	flu	EPI95649	2002-04-24	oceania	new_zealand	canterbury	canterbury	cell	?	?	?	Other Database Import
A/Canterbury/1/2002	flu	EPI94031	2002-04-26	oceania	new_zealand	canterbury	canterbury	cell	?	?	?	Other Database Import
A/Canterbury/2/2002	flu	EPI94050	2002-04-29	oceania	new_zealand	canterbury	canterbury	cell	?	?	?	Other Database Import
A/Vietnam/HN197/2002	flu	EPI395120	2002-05-01	southeast_asia	vietnam	vietnam	vietnam	undetermined	?	?	?	Other Database Import
A/Canterbury/14/2002	flu	EPI94639	2002-05-02	oceania	new_zealand	canterbury	canterbury	cell	?	?	?	Other Database Import
A/Canterbury/15/2002	flu	EPI95668	2002-05-03	oceania	new_zealand	canterbury	canterbury	cell	?	?	?	Other Database Import
A/Canterbury/16/2002	flu	EPI94183	2002-05-04	oceania	new_zealand	canterbury	canterbury	cell	?	?	?	Other Database Import
A/Canterbury/18/2002	flu	EPI94202	2002-05-06	oceania	new_zealand	canterbury	canterbury	cell	?	?	?	Other Database Import
A/Canterbury/20/2002	flu	EPI94677	2002-05-06	oceania	new_zealand	canterbury	canterbury	cell	?	?	?	Other Database Import
A/Netherlands/333/2002	flu	EPI541874	2002-05-07	europe	netherlands	netherlands	netherlands	cell	12m	male	?	Erasmus Medical Center
A/Canterbury/21/2002	flu	EPI95057	2002-05-07	oceania	new_zealand	canterbury	canterbury	cell	?	?	?	Other Database Import
A/Guangdong/100/2002	flu	EPI360215	2002-05-07	china	china	guangdong	guangdong	undetermined	?	?	?	Other Database Import
A/Dakar/10/2002	flu	EPI347428	2002-05-08	africa	senegal	dakar	dakar	cell	17y	?	Institut Pasteur De Dakar	National Institute For Medical Research
A/HongKong/CUHK23111/2002	flu	EPI161070	2002-05-09	china	hong_kong	hong_kong	hong_kong	undetermined	?	?	?	Other Database Import
A/Zhejiang/8/2002	flu	EPI609789	2002-05-09	china	china	zhejiang	zhejiang	undetermined	?	?	?	Other Database Import
A/Canterbury/22/2002	flu	EPI94221	2002-05-10	oceania	new_zealand	canterbury	canterbury	cell	?	?	?	Other Database Import
A/HongKong/CUHK23162/2002	flu	EPI161072	2002-05-10	china	hong_kong	hong_kong	hong_kong	undetermined	?	?	?	Other Database Import
A/HongKong/CUHK23113/2002	flu	EPI161071	2002-05-10	china	hong_kong	hong_kong	hong_kong	undetermined	?	?	?	Other Database Import
A/HongKong/CUHK23180/2002	flu	EPI161073	2002-05-12	china	hong_kong	hong_kong	hong_kong	undetermined	?	?	?	Other Database Import
A/Canterbury/27/2002	flu	EPI94696	2002-05-13	oceania	new_zealand	canterbury	canterbury	cell	?	?	?	Other Database Import
A/NewCaledonia/19/2002	flu	EPI235639	2002-05-13	oceania	new_caledonia	new_caledonia	new_caledonia	undetermined	?	?	?	Other Database Import
A/Vietnam/HN184/2002	flu	EPI395121	2002-05-13	southeast_asia	vietnam	vietnam	vietnam	undetermined	?	?	?	Other Database Import
A/Fujian/166/2002	flu	EPI360229	2002-05-14	china	china	fujian	fujian	undetermined	?	?	?	Other Database Import
A/Argentina/1/2002	flu	EPI147178	2002-05-14	south_america	argentina	argentina	argentina	undetermined	?	?	?	Other Database Import
A/Peru/3029/2002	flu	EPI607402	2002-05-14	south_america	peru	peru	peru	undetermined	?	?	?	Other Database Import
A/Guangzhou/394/2002	flu	EPI606916	2002-05-14	china	china	guangdong	guangzhou	undetermined	?	?	?	Other Database Import
A/Canterbury/19/2002	flu	EPI94658	2002-05-15	oceania	new_zealand	canterbury	canterbury	cell	?	?	?	Other Database Import
A/Canterbury/29/2002	flu	EPI94715	2002-05-15	oceania	new_zealand	canterbury	canterbury	cell	?	?	?	Other Database Import
A/Victoria/506/2002	flu	EPI235686	2002-05-20	oceania	australia	victoria	victoria	undetermined	?	?	?	Other Database Import
A/Guangzhou/405/2002	flu	EPI608391	2002-05-21	china	china	guangdong	guangzhou	undetermined	?	?	?	Other Database Import
A/Canterbury/102/2002	flu	EPI94506	2002-05-23	oceania	new_zealand	canterbury	canterbury	cell	?	?	?	Other Database Import
A/Brazil/1727/2002	flu	EPI609635	2002-05-23	south_america	brazil	brazil	brazil	undetermined	?	?	?	Other Database Import
A/HongKong/CUHK24044/2002	flu	EPI161074	2002-06-01	china	hong_kong	hong_kong	hong_kong	undetermined	?	?	?	Other Database Import
A/HongKong/CUHK24054/2002	flu	EPI161075	2002-06-02	china	hong_kong	hong_kong	hong_kong	undetermined	?	?	?	Other Database Import
A/HongKong/CUHK24114/2002	flu	EPI161076	2002-06-03	china	hong_kong	hong_kong	hong_kong	undetermined	?	?	?	Other Database Import
A/HongKong/CUHK24167/2002	flu	EPI161077	2002-06-04	china	hong_kong	hong_kong	hong_kong	undetermined	?	?	?	Other Database Import
A/Malaysia/22387/2002	flu	EPI371883	2002-06-05	southeast_asia	malaysia	malaysia	malaysia	undetermined	?	?	?	Other Database Import
A/HongKong/1143/2002	flu	EPI607550	2002-06-06	china	hong_kong	hong_kong	hong_kong	undetermined	?	?	?	Other Database Import
A/Canterbury/44/2002	flu	EPI94810	2002-06-07	oceania	new_zealand	canterbury	canterbury	cell	?	?	?	Other Database Import
A/Dunedin/3/2002	flu	EPI37429	2002-06-07	oceania	new_zealand	otago	dunedin	cell	?	?	?	Other Database Import
A/Dunedin/1/2002	flu	EPI44233	2002-06-07	oceania	new_zealand	otago	dunedin	cell	?	?	?	Other Database Import
A/Canterbury/49/2002	flu	EPI94316	2002-06-07	oceania	new_zealand	canterbury	canterbury	cell	?	?	?	Other Database Import
A/Auckland/608/2002	flu	EPI63030	2002-06-08	oceania	new_zealand	auckland	auckland	cell	?	?	?	Other Database Import
A/Canterbury/47/2002	flu	EPI94278	2002-06-08	oceania	new_zealand	canterbury	canterbury	cell	?	?	?	Other Database Import
A/Canterbury/48/2002	flu	EPI94297	2002-06-09	oceania	new_zealand	canterbury	canterbury	cell	?	?	?	Other Database Import
A/Canterbury/46/2002	flu	EPI95076	2002-06-09	oceania	new_zealand	canterbury	canterbury	cell	?	?	?	Other Database Import
A/Canterbury/41/2002	flu	EPI94259	2002-06-10	oceania	new_zealand	canterbury	canterbury	cell	?	?	?	Other Database Import
A/Canterbury/53/2002	flu	EPI94354	2002-06-10	oceania	new_zealand	canterbury	canterbury	cell	?	?	?	Other Database Import
A/Victoria/508/2002	flu	EPI235687	2002-06-11	oceania	australia	victoria	victoria	undetermined	?	?	?	Other Database Import
A/Wellington/7/2002	flu	EPI36688	2002-06-11	oceania	new_zealand	wellington	wellington	cell	?	?	?	Other Database Import
A/Canterbury/50/2002	flu	EPI94335	2002-06-11	oceania	new_zealand	canterbury	canterbury	cell	?	?	?	Other Database Import
A/Canterbury/35/2002	flu	EPI94240	2002-06-13	oceania	new_zealand	canterbury	canterbury	cell	?	?	?	Other Database Import
A/SouthCanterbury/37/2002	flu	EPI94791	2002-06-13	oceania	new_zealand	canterbury	south_canterbury	cell	?	?	?	Other Database Import
A/Christchurch/37/2002	flu	EPI235603	2002-06-13	oceania	new_zealand	canterbury	christchurch	undetermined	?	?	?	Other Database Import
A/Vietnam/HN190/2002	flu	EPI395118	2002-06-13	southeast_asia	vietnam	vietnam	vietnam	undetermined	?	?	?	Other Database Import
A/Taiwan/231/2002	flu	EPI444667	2002-06-14	china	taiwan	taiwan	taiwan	cell	?	?	?	Other Database Import
A/Guangzhou/603/2002	flu	EPI607409	2002-06-15	china	china	guangdong	guangzhou	undetermined	?	?	?	Other Database Import
A/Wellington/38/2002	flu	EPI35054	2002-06-17	oceania	new_zealand	wellington	wellington	cell	?	?	?	Other Database Import
A/Canterbury/34/2002	flu	EPI94772	2002-06-18	oceania	new_zealand	canterbury	canterbury	cell	?	?	?	Other Database Import
A/Auckland/609/2002	flu	EPI63049	2002-06-18	oceania	new_zealand	auckland	auckland	cell	?	?	?	Other Database Import
A/Canterbury/31/2002	flu	EPI94734	2002-06-20	oceania	new_zealand	canterbury	canterbury	cell	?	?	?	Other Database Import
A/Brisbane/6/2002	flu	EPI235592	2002-06-20	oceania	australia	queensland	brisbane	undetermined	?	?	?	Other Database Import
A/Canterbury/33/2002	flu	EPI94753	2002-06-20	oceania	new_zealand	canterbury	canterbury	cell	?	?	?	Other Database Import
A/Hanoi/190/2002	flu	EPI2482	2002-06-23	southeast_asia	vietnam	hanoi	hanoi	undetermined	?	?	?	Other Database Import
A/WesternAustralia/23/2002	flu	EPI38816	2002-06-25	oceania	australia	western_australia	western_australia	cell	?	?	?	Other Database Import
A/Canterbury/58/2002	flu	EPI94829	2002-06-25	oceania	new_zealand	canterbury	canterbury	cell	?	?	?	Other Database Import
A/WesternAustralia/24/2002	flu	EPI48473	2002-06-25	oceania	australia	western_australia	western_australia	cell	?	?	?	Other Database Import
A/Canterbury/56/2002	flu	EPI94373	2002-06-25	oceania	new_zealand	canterbury	canterbury	cell	?	?	?	Other Database Import
A/Canterbury/57/2002	flu	EPI95095	2002-06-27	oceania	new_zealand	canterbury	canterbury	cell	?	?	?	Other Database Import
A/Brazil/1732/2002	flu	EPI609811	2002-06-27	south_america	brazil	brazil	brazil	undetermined	?	?	?	Other Database Import
A/Canterbury/66/2002	flu	EPI94848	2002-06-28	oceania	new_zealand	canterbury	canterbury	cell	?	?	?	Other Database Import
A/Guangzhou/533/2002	flu	EPI360256	2002-06-28	china	china	guangdong	guangzhou	undetermined	?	?	?	Other Database Import
A/Canterbury/61/2002	flu	EPI95706	2002-06-30	oceania	new_zealand	canterbury	canterbury	cell	?	?	?	Other Database Import
A/Canterbury/60/2002	flu	EPI95687	2002-06-30	oceania	new_zealand	canterbury	canterbury	cell	?	?	?	Other Database Import
A/Canterbury/62/2002	flu	EPI95725	2002-07-01	oceania	new_zealand	canterbury	canterbury	cell	?	?	?	Other Database Import
A/HongKong/CUHK33047/2002	flu	EPI161111	2002-07-01	china	hong_kong	hong_kong	hong_kong	undetermined	?	?	?	Other Database Import
A/Dunedin/8/2002	flu	EPI35947	2002-07-01	oceania	new_zealand	otago	dunedin	cell	?	?	?	Other Database Import
A/Waikato/21/2002	flu	EPI35092	2002-07-01	oceania	new_zealand	waikato	waikato	cell	?	?	?	Other Database Import
A/Bangkok/190/2002	flu	EPI609843	2002-07-01	southeast_asia	thailand	bangkok	bangkok	undetermined	?	?	?	Other Database Import
A/Canterbury/64/2002	flu	EPI95744	2002-07-02	oceania	new_zealand	canterbury	canterbury	cell	?	?	?	Other Database Import
A/Singapore/29/2002	flu	EPI606391	2002-07-02	southeast_asia	singapore	singapore	singapore	undetermined	?	?	?	Other Database Import
A/Canterbury/59/2002	flu	EPI94392	2002-07-02	oceania	new_zealand	canterbury	canterbury	cell	?	?	?	Other Database Import
A/HongKong/CUHK33106/2002	flu	EPI161113	2002-07-02	china	hong_kong	hong_kong	hong_kong	undetermined	?	?	?	Other Database Import
A/HongKong/CUHK33079/2002	flu	EPI161112	2002-07-02	china	hong_kong	hong_kong	hong_kong	undetermined	?	?	?	Other Database Import
A/Wellington/66/2002	flu	EPI35073	2002-07-03	oceania	new_zealand	wellington	wellington	cell	?	?	?	Other Database Import
A/Vietnam/HN209/2002	flu	EPI395119	2002-07-03	southeast_asia	vietnam	vietnam	vietnam	undetermined	?	?	?	Other Database Import
A/Waikato/23/2002	flu	EPI44252	2002-07-03	oceania	new_zealand	waikato	waikato	cell	?	?	?	Other Database Import
A/Hanoi/209/2002	flu	EPI2494	2002-07-04	southeast_asia	vietnam	hanoi	hanoi	undetermined	?	?	?	Other Database Import
A/HongKong/CUHK33199/2002	flu	EPI161114	2002-07-04	china	hong_kong	hong_kong	hong_kong	undetermined	?	?	?	Other Database Import
A/Sydney/23/2002	flu	EPI235664	2002-07-04	oceania	australia	new_south_wales	sydney	undetermined	?	?	?	Other Database Import
A/Canterbury/68/2002	flu	EPI94411	2002-07-05	oceania	new_zealand	canterbury	canterbury	cell	?	?	?	Other Database Import
A/Canterbury/69/2002	flu	EPI94430	2002-07-06	oceania	new_zealand	canterbury	canterbury	cell	?	?	?	Other Database Import
A/Canterbury/72/2002	flu	EPI94867	2002-07-06	oceania	new_zealand	canterbury	canterbury	cell	?	?	?	Other Database Import
A/Canterbury/70/2002	flu	EPI95763	2002-07-06	oceania	new_zealand	canterbury	canterbury	cell	?	?	?	Other Database Import
A/SouthAustralia/79/2002	flu	EPI235668	2002-07-06	oceania	australia	south_australia	south_australia	undetermined	?	?	?	Other Database Import
A/Sydney/21/2002	flu	EPI235663	2002-07-07	oceania	australia	new_south_wales	sydney	undetermined	?	?	?	Other Database Import
A/Victoria/515/2002	flu	EPI235688	2002-07-08	oceania	australia	victoria	victoria	undetermined	?	?	?	Other Database Import
A/Canterbury/76/2002	flu	EPI95782	2002-07-08	oceania	new_zealand	canterbury	canterbury	cell	?	?	?	Other Database Import
A/WesternAustralia/26/2002	flu	EPI44632	2002-07-08	oceania	australia	western_australia	western_australia	cell	?	?	?	Other Database Import
A/Canterbury/79/2002	flu	EPI94886	2002-07-09	oceania	new_zealand	canterbury	canterbury	cell	?	?	?	Other Database Import
A/Canterbury/81/2002	flu	EPI94487	2002-07-09	oceania	new_zealand	canterbury	canterbury	cell	?	?	?	Other Database Import
A/Dunedin/10/2002	flu	EPI34503	2002-07-09	oceania	new_zealand	otago	dunedin	cell	?	?	?	Other Database Import
A/Dunedin/9/2002	flu	EPI35928	2002-07-09	oceania	new_zealand	otago	dunedin	cell	?	?	?	Other Database Import
A/Auckland/26/2002	flu	EPI235564	2002-07-09	oceania	new_zealand	auckland	auckland	undetermined	?	?	?	Other Database Import
A/SouthAustralia/84/2002	flu	EPI545309	2002-07-10	oceania	australia	south_australia	south_australia	cell	?	?	?	Other Database Import
A/WesternAustralia/25/2002	flu	EPI44613	2002-07-10	oceania	australia	western_australia	western_australia	cell	?	?	?	Other Database Import
A/Vietnam/HN235/2002	flu	EPI395117	2002-07-10	southeast_asia	vietnam	vietnam	vietnam	undetermined	?	?	?	Other Database Import
A/Canterbury/80/2002	flu	EPI94468	2002-07-11	oceania	new_zealand	canterbury	canterbury	cell	?	?	?	Other Database Import
A/Canterbury/75/2002	flu	EPI94449	2002-07-11	oceania	new_zealand	canterbury	canterbury	cell	?	?	?	Other Database Import
A/Waikato/29/2002	flu	EPI35985	2002-07-12	oceania	new_zealand	waikato	waikato	cell	?	?	?	Other Database Import
A/Wellington/71/2002	flu	EPI35966	2002-07-15	oceania	new_zealand	wellington	wellington	cell	?	?	?	Other Database Import
A/Bangkok/247/2002	flu	EPI607237	2002-07-15	southeast_asia	thailand	bangkok	bangkok	undetermined	?	?	?	Other Database Import
A/Queensland/22/2002	flu	EPI49770	2002-07-15	oceania	australia	queensland	queensland	cell	?	?	?	Other Database Import
A/Brazil/2030/2002	flu	EPI606251	2002-07-16	south_america	brazil	brazil	brazil	undetermined	?	?	?	Other Database Import
A/Townsville/4/2002	flu	EPI545326	2002-07-17	oceania	australia	queensland	townsville	cell	?	?	?	Other Database Import
A/Philippines/160283/2002	flu	EPI606484	2002-07-17	southeast_asia	philippines	philippines	philippines	undetermined	?	?	?	Other Database Import
A/Brisbane/45/2002	flu	EPI235590	2002-07-17	oceania	australia	queensland	brisbane	undetermined	?	?	?	Other Database Import
A/Philippines/16105/2002	flu	EPI606880	2002-07-17	southeast_asia	philippines	philippines	philippines	undetermined	?	?	?	Other Database Import
A/Philippines/471/2002	flu	EPI144999	2002-07-18	southeast_asia	philippines	philippines	philippines	undetermined	?	?	?	Other Database Import
A/Waikato/25/2002	flu	EPI38493	2002-07-18	oceania	new_zealand	waikato	waikato	cell	?	?	?	Other Database Import
A/Thailand/162496/2002	flu	EPI608749	2002-07-18	southeast_asia	thailand	thailand	thailand	undetermined	?	?	?	Other Database Import
A/Madagascar/66220/2002	flu	EPI347430	2002-07-19	africa	madagascar	madagascar	madagascar	cell	1y	male	Institut Pasteur De Madagascar	National Institute For Medical Research
A/Guangdong/313/2002	flu	EPI360213	2002-07-20	china	china	guangdong	guangdong	undetermined	?	?	?	Other Database Import
A/Guangdong/314/2002	flu	EPI360216	2002-07-20	china	china	guangdong	guangdong	undetermined	?	?	?	Other Database Import
A/Guangdong/308/2002	flu	EPI360253	2002-07-20	china	china	guangdong	guangdong	undetermined	?	?	?	Other Database Import
A/Fujian/353/2002	flu	EPI360230	2002-07-21	china	china	fujian	fujian	undetermined	?	?	?	Other Database Import
A/WesternAustralia/27/2002	flu	EPI47827	2002-07-21	oceania	australia	western_australia	western_australia	cell	?	?	?	Other Database Import
A/Taiwan/299/2002	flu	EPI444668	2002-07-21	china	taiwan	taiwan	taiwan	cell	?	?	?	Other Database Import
A/Fujian/354/2002	flu	EPI607306	2002-07-23	china	china	fujian	fujian	undetermined	?	?	?	Other Database Import
A/Waikato/36/2002	flu	EPI38512	2002-07-23	oceania	new_zealand	waikato	waikato	undetermined	?	?	?	Other Database Import
A/Dunedin/12/2002	flu	EPI39284	2002-07-23	oceania	new_zealand	otago	dunedin	cell	?	?	?	Other Database Import
A/Queensland/24/2002	flu	EPI48929	2002-07-25	oceania	australia	queensland	queensland	cell	?	?	?	Other Database Import
A/Waikato/31/2002	flu	EPI39265	2002-07-26	oceania	new_zealand	waikato	waikato	cell	?	?	?	Other Database Import
A/HongKong/1510/2002	flu	EPI609528	2002-07-26	china	hong_kong	hong_kong	hong_kong	undetermined	?	?	?	Other Database Import
A/Queensland/21/2002	flu	EPI48891	2002-07-26	oceania	australia	queensland	queensland	cell	?	?	?	Other Database Import
A/Brisbane/115/2002	flu	EPI235577	2002-07-26	oceania	australia	queensland	brisbane	undetermined	?	?	?	Other Database Import
A/Auckland/610/2002	flu	EPI68885	2002-07-29	oceania	new_zealand	auckland	auckland	cell	?	?	?	Other Database Import
A/Brisbane/122/2002	flu	EPI235578	2002-07-31	oceania	australia	queensland	brisbane	undetermined	?	?	?	Other Database Import
A/HongKong/CUHK34175/2002	flu	EPI161126	2002-08-01	china	hong_kong	hong_kong	hong_kong	undetermined	?	?	?	Other Database Import
A/Auckland/613/2002	flu	EPI62200	2002-08-01	oceania	new_zealand	auckland	auckland	cell	?	?	?	Other Database Import
A/Dunedin/14/2002	flu	EPI35111	2002-08-01	oceania	new_zealand	otago	dunedin	undetermined	?	?	?	Other Database Import
A/HongKong/1554/2002	flu	EPI606491	2002-08-02	china	hong_kong	hong_kong	hong_kong	undetermined	?	?	?	Other Database Import
A/HongKong/CUHK34193/2002	flu	EPI161127	2002-08-02	china	hong_kong	hong_kong	hong_kong	undetermined	?	?	?	Other Database Import
A/Darwin/4/2002	flu	EPI235608	2002-08-02	oceania	australia	northern_territory	darwin	undetermined	?	?	?	Other Database Import
A/Hunan/367/2002	flu	EPI360241	2002-08-04	china	china	hunan	hunan	undetermined	?	?	?	Other Database Import
A/Hunan/368/2002	flu	EPI360210	2002-08-05	china	china	hunan	hunan	undetermined	?	?	?	Other Database Import
A/Hunan/371/2002	flu	EPI360265	2002-08-05	china	china	hunan	hunan	undetermined	?	?	?	Other Database Import
A/WesternAustralia/28/2002	flu	EPI44651	2002-08-06	oceania	australia	western_australia	western_australia	cell	?	?	?	Other Database Import
A/Queensland/26/2002	flu	EPI48948	2002-08-06	oceania	australia	queensland	queensland	cell	?	?	?	Other Database Import
A/Bangkok/223/2002	flu	EPI607350	2002-08-07	southeast_asia	thailand	bangkok	bangkok	undetermined	?	?	?	Other Database Import
A/Brisbane/144/2002	flu	EPI235580	2002-08-08	oceania	australia	queensland	brisbane	undetermined	?	?	?	Other Database Import
A/Brisbane/132/2002	flu	EPI235579	2002-08-08	oceania	australia	queensland	brisbane	undetermined	?	?	?	Other Database Import
A/Brazil/2458/2002	flu	EPI608648	2002-08-09	south_america	brazil	brazil	brazil	undetermined	?	?	?	Other Database Import
A/Brisbane/157/2002	flu	EPI235581	2002-08-11	oceania	australia	queensland	brisbane	undetermined	?	?	?	Other Database Import
A/Brisbane/168/2002	flu	EPI235582	2002-08-12	oceania	australia	queensland	brisbane	undetermined	?	?	?	Other Database Import
A/Waikato/51/2002	flu	EPI36061	2002-08-12	oceania	new_zealand	waikato	waikato	cell	14y	male	?	Other Database Import
A/Waikato/52/2002	flu	EPI36042	2002-08-12	oceania	new_zealand	waikato	waikato	cell	?	?	?	Other Database Import
A/Queensland/28/2002	flu	EPI49808	2002-08-12	oceania	australia	queensland	queensland	cell	?	?	?	Other Database Import
A/Dunedin/18/2002	flu	EPI38531	2002-08-12	oceania	new_zealand	otago	dunedin	cell	?	?	?	Other Database Import
A/Queensland/23/2002	flu	EPI48910	2002-08-13	oceania	australia	queensland	queensland	cell	?	?	?	Other Database Import
A/Queensland/27/2002	flu	EPI49789	2002-08-13	oceania	australia	queensland	queensland	cell	?	?	?	Other Database Import
A/Vietnam/HN217/2002	flu	EPI395122	2002-08-13	southeast_asia	vietnam	vietnam	vietnam	undetermined	?	?	?	Other Database Import
A/Brisbane/192/2002	flu	EPI235583	2002-08-13	oceania	australia	queensland	brisbane	undetermined	?	?	?	Other Database Import
A/Auckland/612/2002	flu	EPI63068	2002-08-14	oceania	new_zealand	auckland	auckland	cell	?	?	?	Other Database Import
A/India/25502/2002	flu	EPI607352	2002-08-16	south_asia	india	india	india	undetermined	?	?	?	Other Database Import
A/Bangkok/413/2002	flu	EPI608142	2002-08-16	southeast_asia	thailand	bangkok	bangkok	undetermined	?	?	?	Other Database Import
A/Pune/25502/2002	flu	EPI606718	2002-08-16	south_asia	india	maharashtra	pune	undetermined	?	?	?	Other Database Import
A/Pune/25506/2002	flu	EPI609029	2002-08-16	south_asia	india	maharashtra	pune	undetermined	?	?	?	Other Database Import
A/Queensland/29/2002	flu	EPI49827	2002-08-17	oceania	australia	queensland	queensland	cell	?	?	?	Other Database Import
A/WesternAustralia/30/2002	flu	EPI44689	2002-08-19	oceania	australia	western_australia	western_australia	cell	?	?	?	Other Database Import
A/Guangdong/327/2002	flu	EPI360217	2002-08-19	china	china	guangdong	guangdong	undetermined	?	?	?	Other Database Import
A/Wellington/79/2002	flu	EPI36023	2002-08-20	oceania	new_zealand	wellington	wellington	undetermined	?	?	?	Other Database Import
A/Hunan/407/2002	flu	EPI609757	2002-08-20	china	china	hunan	hunan	undetermined	?	?	?	Other Database Import
A/Wellington/80/2002	flu	EPI36004	2002-08-20	oceania	new_zealand	wellington	wellington	cell	?	?	?	Other Database Import
A/Perth/49/2002	flu	EPI235656	2002-08-21	oceania	australia	western_australia	perth	undetermined	?	?	?	Other Database Import
A/Brisbane/237/2002	flu	EPI235585	2002-08-21	oceania	australia	queensland	brisbane	undetermined	?	?	?	Other Database Import
A/WesternAustralia/29/2002	flu	EPI44670	2002-08-21	oceania	australia	western_australia	western_australia	cell	?	?	?	Other Database Import
A/Brisbane/230/2002	flu	EPI235584	2002-08-21	oceania	australia	queensland	brisbane	undetermined	?	?	?	Other Database Import
A/Okinawa/45/2002	flu	EPI173341	2002-08-22	japan_korea	japan	okinawa	okinawa	undetermined	?	?	?	Other Database Import
A/Victoria/235/2002	flu	EPI235683	2002-08-22	oceania	australia	victoria	victoria	undetermined	?	?	?	Other Database Import
A/Darwin/13/2002	flu	EPI235606	2002-08-23	oceania	australia	northern_territory	darwin	undetermined	?	?	?	Other Database Import
A/Queensland/30/2002	flu	EPI54667	2002-08-23	oceania	australia	queensland	queensland	cell	?	?	?	Other Database Import
A/Waikato/58/2002	flu	EPI35130	2002-08-23	oceania	new_zealand	waikato	waikato	undetermined	?	?	?	Other Database Import
A/Fujian/458/2002	flu	EPI360228	2002-08-24	china	china	fujian	fujian	undetermined	?	?	?	Other Database Import
A/WesternAustralia/32/2002	flu	EPI47846	2002-08-26	oceania	australia	western_australia	western_australia	cell	?	?	?	Other Database Import
A/Hunan/422/2002	flu	EPI360287	2002-08-26	china	china	hunan	hunan	undetermined	?	?	?	Other Database Import
A/WesternAustralia/33/2002	flu	EPI360158	2002-08-26	oceania	australia	western_australia	western_australia	cell	8y	female	?	Other Database Import
A/Brisbane/269/2002	flu	EPI235586	2002-08-26	oceania	australia	queensland	brisbane	undetermined	?	?	?	Other Database Import
A/WesternAustralia/31/2002	flu	EPI44708	2002-08-26	oceania	australia	western_australia	western_australia	cell	?	?	?	Other Database Import
A/Sydney/275/2002	flu	EPI235665	2002-08-28	oceania	australia	new_south_wales	sydney	undetermined	?	?	?	Other Database Import
A/WesternAustralia/34/2002	flu	EPI56961	2002-08-28	oceania	australia	western_australia	western_australia	cell	?	?	?	Other Database Import
A/Auckland/57/2002	flu	EPI235565	2002-09-03	oceania	new_zealand	auckland	auckland	undetermined	?	?	?	Other Database Import
A/Brisbane/312/2002	flu	EPI235588	2002-09-04	oceania	australia	queensland	brisbane	undetermined	?	?	?	Other Database Import
A/Malaysia/145/2002	flu	EPI606598	2002-09-09	southeast_asia	malaysia	malaysia	malaysia	undetermined	?	?	?	Other Database Import
A/Auckland/611/2002	flu	EPI62181	2002-09-09	oceania	new_zealand	auckland	auckland	cell	?	?	?	Other Database Import
A/Hunan/439/2002	flu	EPI360242	2002-09-09	china	china	hunan	hunan	undetermined	?	?	?	Other Database Import
A/Wellington/86/2002	flu	EPI35187	2002-09-13	oceania	new_zealand	wellington	wellington	cell	?	?	?	Other Database Import
A/Darwin/14/2002	flu	EPI235607	2002-09-13	oceania	australia	northern_territory	darwin	undetermined	?	?	?	Other Database Import
A/SouthAustralia/154/2002	flu	EPI235667	2002-09-15	oceania	australia	south_australia	south_australia	undetermined	?	?	?	Other Database Import
A/Victoria/254/2002	flu	EPI235684	2002-09-16	oceania	australia	victoria	victoria	undetermined	?	?	?	Other Database Import
A/Dakar/33/2002	flu	EPI347433	2002-09-18	africa	senegal	dakar	dakar	cell	1y	?	Institut Pasteur De Dakar	National Institute For Medical Research
A/Brisbane/324/2002	flu	EPI235589	2002-09-25	oceania	australia	queensland	brisbane	undetermined	?	?	?	Other Database Import
A/Taiwan/8/2002	flu	EPI608289	2002-09-25	china	taiwan	taiwan	taiwan	undetermined	?	?	?	Other Database Import
A/WesternAustralia/35/2002	flu	EPI44727	2002-09-29	oceania	australia	western_australia	western_australia	cell	?	?	?	Other Database Import
A/Perth/89/2002	flu	EPI235657	2002-09-29	oceania	australia	western_australia	perth	undetermined	?	?	?	Other Database Import
A/Anhui/550/2002	flu	EPI147201	2002-10-01	china	china	anhui	anhui	undetermined	?	?	?	Other Database Import
A/HongKong/CUHK50200/2002	flu	EPI161156	2002-10-01	china	hong_kong	hong_kong	hong_kong	undetermined	?	?	?	Other Database Import
A/Victoria/432/2002	flu	EPI235685	2002-10-02	oceania	australia	victoria	victoria	undetermined	?	?	?	Other Database Import
A/HongKong/CUHK50256/2002	flu	EPI161157	2002-10-03	china	hong_kong	hong_kong	hong_kong	undetermined	?	?	?	Other Database Import
A/WesternAustralia/36/2002	flu	EPI44746	2002-10-15	oceania	australia	western_australia	western_australia	cell	?	?	?	Other Database Import
A/Lyon/19989/2002	flu	EPI235635	2002-10-15	europe	france	auvergne_rhone_alpes	lyon	undetermined	?	?	?	Other Database Import
A/Guam/228/2002	flu	EPI147193	2002-10-26	oceania	guam	guam	guam	undetermined	?	?	?	Other Database Import
A/Malaysia/232/2002	flu	EPI607077	2002-10-28	southeast_asia	malaysia	malaysia	malaysia	undetermined	?	?	?	Other Database Import
A/Dakar/50/2002	flu	EPI347434	2002-10-30	africa	senegal	dakar	dakar	cell	?	?	Institut Pasteur De Dakar	National Institute For Medical Research
A/Hawaii/HI-02-3736/2002	flu	EPI235619	2002-10-30	north_america	usa	hawaii	hawaii	undetermined	?	?	?	Other Database Import
A/Kwangju/219/2002	flu	EPI21490	2002-10-31	japan_korea	south_korea	honam	kwangju	undetermined	?	?	?	Other Database Import
A/NewYork/28/2002	flu	EPI147195	2002-11-01	north_america	usa	new_york	new_york	undetermined	?	?	?	Other Database Import
A/Sofia/344/2002	flu	EPI235661	2002-11-02	europe	bulgaria	sofia	sofia	undetermined	?	?	?	Other Database Import
A/Sofia/343/2002	flu	EPI235666	2002-11-02	europe	bulgaria	sofia	sofia	undetermined	?	?	?	Other Database Import
A/NewJersey/4/2002	flu	EPI235641	2002-11-04	north_america	usa	new_jersey	new_jersey	undetermined	?	?	?	Other Database Import
A/Brazil/5/2002	flu	EPI607314	2002-11-13	south_america	brazil	brazil	brazil	undetermined	?	?	?	Other Database Import
A/Malaysia/23606/2002	flu	EPI373319	2002-11-18	southeast_asia	malaysia	malaysia	malaysia	undetermined	?	?	?	Other Database Import
A/Busan/504/2002	flu	EPI21468	2002-11-20	japan_korea	south_korea	busan	busan	undetermined	?	?	?	Other Database Import
A/Cheonnam/323/2002	flu	EPI21474	2002-11-20	japan_korea	south_korea	jeollanam	jeollanam	undetermined	?	?	?	Other Database Import
A/Henan/316/2002	flu	EPI360237	2002-11-21	china	china	henan	henan	undetermined	?	?	?	Other Database Import
A/Beijing/178-NEW-AGN/2002	flu	EPI147198	2002-11-21	china	china	beijing	beijing	undetermined	?	?	?	Other Database Import
A/Philippines/PH-1159050/2002	flu	EPI147199	2002-11-21	southeast_asia	philippines	philippines	philippines	undetermined	?	?	?	Other Database Import
A/Chungnam/271/2002	flu	EPI254133	2002-11-22	japan_korea	south_korea	chungcheongnam	chungnam	undetermined	?	?	?	Other Database Import
A/Tianjin/132/2002	flu	EPI360274	2002-11-23	china	china	tianjin	tianjin	undetermined	?	?	?	Other Database Import
A/Ishikawa/102/2002	flu	EPI115418	2002-11-26	japan_korea	japan	ishikawa	ishikawa	cell	?	?	?	Other Database Import
A/Cheonnam/432/2002	flu	EPI21480	2002-11-26	japan_korea	south_korea	jeollanam	jeollanam	undetermined	?	?	?	Other Database Import
A/Daejeon/390/2002	flu	EPI21486	2002-11-27	japan_korea	south_korea	daejeon	daejeon	undetermined	?	?	?	Other Database Import
A/Jeju/274/2002	flu	EPI21470	2002-11-29	japan_korea	south_korea	jeju	jeju	undetermined	?	?	?	Other Database Import
A/Tianjin/147/2002	flu	EPI360275	2002-11-30	china	china	tianjin	tianjin	undetermined	?	?	?	Other Database Import
A/Paris/207/2002	flu	EPI235652	2002-12-01	europe	france	ile_de_france	paris	undetermined	?	?	?	Other Database Import
A/Korea/770/2002	flu	EPI157899	2002-12-02	japan_korea	south_korea	south_korea	south_korea	cell	?	?	?	Centers For Disease Control And Prevention
A/SouthKorea/770/2002	flu	EPI609585	2002-12-02	japan_korea	south_korea	south_korea	south_korea	undetermined	?	?	?	Other Database Import
A/Korea/KO-RSP-02-770/2002	flu	EPI235633	2002-12-02	japan_korea	south_korea	south_korea	south_korea	undetermined	?	?	?	Other Database Import
A/Genoa/1/2002	flu	EPI173800	2002-12-02	europe	italy	liguria	genoa	cell	?	?	?	Other Database Import
A/Alaska/AK-RSP-02-753/2002	flu	EPI235566	2002-12-02	north_america	usa	alaska	alaska	undetermined	?	?	?	Other Database Import
A/California/CA-T02-3025/2002	flu	EPI235604	2002-12-03	north_america	usa	california	california	undetermined	?	?	?	Other Database Import
A/Okinawa/47/2002	flu	EPI173342	2002-12-04	japan_korea	japan	okinawa	okinawa	undetermined	?	?	?	Other Database Import
A/Taiwan/478/2002	flu	EPI444669	2002-12-05	china	taiwan	taiwan	taiwan	cell	?	?	?	Other Database Import
A/Singapore/44/2002	flu	EPI607546	2002-12-07	southeast_asia	singapore	singapore	singapore	undetermined	?	?	?	Other Database Import
A/Taiwan/1521/2002	flu	EPI607260	2002-12-09	china	taiwan	taiwan	taiwan	undetermined	?	?	?	Other Database Import
A/Japan/910/2002	flu	EPI606633	2002-12-09	japan_korea	japan	japan	japan	undetermined	?	?	?	Other Database Import
A/Japan/JA-RSP-02-910/2002	flu	EPI147205	2002-12-09	japan_korea	japan	japan	japan	undetermined	?	?	?	Other Database Import
A/Taiwan/TW-1521/2002	flu	EPI147206	2002-12-09	china	taiwan	taiwan	taiwan	undetermined	?	?	?	Other Database Import
A/Netherlands/368/2002	flu	EPI146318	2002-12-10	europe	netherlands	netherlands	netherlands	undetermined	?	?	?	Other Database Import
A/Vietnam/HN1872/2002	flu	EPI395123	2002-12-11	southeast_asia	vietnam	vietnam	vietnam	undetermined	?	?	?	Other Database Import
A/Turkey/TU-RSP-02-1035/2002	flu	EPI147207	2002-12-13	west_asia	turkey	turkey	turkey	undetermined	?	?	?	Other Database Import
A/Taiwan/TW-1522/2002	flu	EPI147208	2002-12-15	china	taiwan	taiwan	taiwan	undetermined	?	?	?	Other Database Import
A/Taiwan/1522/2002	flu	EPI607346	2002-12-15	china	taiwan	taiwan	taiwan	undetermined	?	?	?	Other Database Import
A/HongKong/CUHK53123/2002	flu	EPI161187	2002-12-18	china	hong_kong	hong_kong	hong_kong	undetermined	?	?	?	Other Database Import
A/Beijing/51/2002	flu	EPI147209	2002-12-20	china	china	beijing	beijing	undetermined	?	?	?	Other Database Import
A/Beijing/301/2002	flu	EPI147210	2002-12-20	china	china	beijing	beijing	undetermined	?	?	?	Other Database Import
A/Egypt/151/2002	flu	EPI347423	2002-12-22	africa	egypt	egypt	egypt	cell	?	?	Vacsera	National Institute For Medical Research
A/Singapore/50/2002	flu	EPI609785	2002-12-22	southeast_asia	singapore	singapore	singapore	undetermined	?	?	?	Other Database Import
A/Hawaii/HI-02-4051/2002	flu	EPI235620	2002-12-22	north_america	usa	hawaii	hawaii	undetermined	?	?	?	Other Database Import
A/Latvia/13794/2002	flu	EPI146289	2002-12-23	europe	latvia	latvia	latvia	undetermined	?	?	?	Other Database Import
A/Hawaii/HI-02-4055/2002	flu	EPI235621	2002-12-24	north_america	usa	hawaii	hawaii	undetermined	?	?	?	Other Database Import
A/Okinawa/50/2002	flu	EPI173343	2002-12-24	japan_korea	japan	okinawa	okinawa	undetermined	?	?	?	Other Database Import
A/Liaoning/43/2002	flu	EPI360267	2002-12-25	china	china	liaoning	liaoning	undetermined	?	?	?	Other Database Import
A/Kumamoto/102/2002	flu	EPI115169	2002-12-25	japan_korea	japan	kumamoto	kumamoto	undetermined	?	?	?	Other Database Import
A/HongKong/CUHK53327/2002	flu	EPI161189	2002-12-27	china	hong_kong	hong_kong	hong_kong	undetermined	?	?	?	Other Database Import
A/Hebei/37/2002	flu	EPI360208	2002-12-28	china	china	hebei	hebei	undetermined	?	?	?	Other Database Import
A/Hawaii/HI-02-4092/2002	flu	EPI235622	2002-12-28	north_america	usa	hawaii	hawaii	undetermined	?	?	?	Other Database Import
A/NorthCarolina/NC-C02-4981/2002	flu	EPI235646	2002-12-29	north_america	usa	north_carolina	north_carolina	undetermined	?	?	?	Other Database Import
A/Hawaii/19/2002	flu	EPI235617	2002-12-30	north_america	usa	hawaii	hawaii	undetermined	?	?	?	Other Database Import
A/Taiwan/2/2003	flu	EPI444671	2003-01-01	china	taiwan	taiwan	taiwan	cell	?	?	?	Other Database Import
A/Taiwan/3/2003	flu	EPI1447586	2003-01-02	china	taiwan	taiwan	taiwan	cell	12y	?	Center For Disease Control	Who Collaborating Centre For Reference And Research On Influenza
A/Okinawa/2/2003	flu	EPI173344	2003-01-04	japan_korea	japan	okinawa	okinawa	undetermined	?	?	?	Other Database Import
A/Khabarovsk/361/2003	flu	EPI157887	2003-01-04	west_asia	russia	khabarovsk	khabarovsk	cell	?	?	?	Centers For Disease Control And Prevention
A/Georgia/GA-0302328070/2003	flu	EPI146019	2003-01-06	north_america	usa	georgia	georgia	undetermined	?	?	?	Other Database Import
A/Liaoning/32/2003	flu	EPI360363	2003-01-06	china	china	liaoning	liaoning	undetermined	?	?	?	Other Database Import
A/HongKong/CUHK5111/2003	flu	EPI161165	2003-01-06	china	hong_kong	hong_kong	hong_kong	undetermined	?	?	?	Other Database Import
A/HongKong/CUHK5167/2003	flu	EPI161171	2003-01-07	china	hong_kong	hong_kong	hong_kong	undetermined	?	?	?	Other Database Import
A/Singapore/8/2003	flu	EPI1447548	2003-01-07	southeast_asia	singapore	singapore	singapore	cell	60y	female	Singapore General Hospital	Who Collaborating Centre For Reference And Research On Influenza
A/Singapore/7/2003	flu	EPI1447546	2003-01-07	southeast_asia	singapore	singapore	singapore	cell	43y	female	Singapore General Hospital	Who Collaborating Centre For Reference And Research On Influenza
A/Washington/WA-V130811/2003	flu	EPI234966	2003-01-08	north_america	usa	washington	washington	undetermined	?	?	?	Other Database Import
A/Okinawa/5/2003	flu	EPI173345	2003-01-08	japan_korea	japan	okinawa	okinawa	undetermined	?	?	?	Other Database Import
A/England/1/2003	flu	EPI145077	2003-01-08	europe	united_kingdom	england	england	undetermined	?	?	?	Other Database Import
A/Indonesia/13/2003	flu	EPI1447461	2003-01-08	southeast_asia	indonesia	indonesia	indonesia	cell	18y	?	U.s. Namru 2 Indonesia	Who Collaborating Centre For Reference And Research On Influenza
A/Singapore/24/2003	flu	EPI1447532	2003-01-09	southeast_asia	singapore	singapore	singapore	cell	2y	female	Singapore General Hospital	Who Collaborating Centre For Reference And Research On Influenza
A/Malaysia/23995/2003	flu	EPI372089	2003-01-09	southeast_asia	malaysia	malaysia	malaysia	undetermined	?	?	?	Other Database Import
A/Okinawa/10/2003	flu	EPI173347	2003-01-09	japan_korea	japan	okinawa	okinawa	undetermined	?	?	?	Other Database Import
A/Taiwan/12/2003	flu	EPI444673	2003-01-10	china	taiwan	taiwan	taiwan	cell	?	?	?	Other Database Import
A/Okinawa/8/2003	flu	EPI173346	2003-01-10	japan_korea	japan	okinawa	okinawa	undetermined	?	?	?	Other Database Import
A/HongKong/CUHK5316/2003	flu	EPI161188	2003-01-10	china	hong_kong	hong_kong	hong_kong	undetermined	?	?	?	Other Database Import
A/Malaysia/29/2003	flu	EPI1447477	2003-01-13	southeast_asia	malaysia	malaysia	malaysia	cell	?	?	Institut Penyelidikan Perubatan	Who Collaborating Centre For Reference And Research On Influenza
A/Egypt/EG-2002923226/2003	flu	EPI146009	2003-01-14	africa	egypt	egypt	egypt	undetermined	?	?	?	Other Database Import
A/Bayern/1/2003	flu	EPI146293	2003-01-14	europe	germany	bayern	bayern	undetermined	?	?	?	Other Database Import
A/Egypt/923226/2003	flu	EPI157572	2003-01-14	africa	egypt	egypt	egypt	cell	?	?	?	Centers For Disease Control And Prevention
A/England/26/2003	flu	EPI358867	2003-01-15	europe	united_kingdom	england	england	undetermined	?	?	?	Other Database Import
A/Okinawa/17/2003	flu	EPI173349	2003-01-15	japan_korea	japan	okinawa	okinawa	undetermined	?	?	?	Other Database Import
A/Okinawa/28/2003	flu	EPI173352	2003-01-15	japan_korea	japan	okinawa	okinawa	undetermined	?	?	?	Other Database Import
A/Michigan/MI-VC76/2003	flu	EPI146072	2003-01-15	north_america	usa	michigan	michigan	undetermined	?	?	?	Other Database Import
A/Singapore/16/2003	flu	EPI1447531	2003-01-15	southeast_asia	singapore	singapore	singapore	cell	7y	female	Singapore General Hospital	Who Collaborating Centre For Reference And Research On Influenza
A/Okinawa/18/2003	flu	EPI173350	2003-01-15	japan_korea	japan	okinawa	okinawa	undetermined	?	?	?	Other Database Import
A/Sydney/6/2003	flu	EPI1447568	2003-01-15	oceania	australia	new_south_wales	sydney	cell	?	male	Clinical Virology Unit, Cdim	Who Collaborating Centre For Reference And Research On Influenza
A/Sydney/2/2003	flu	EPI1447560	2003-01-15	oceania	australia	new_south_wales	sydney	cell	?	male	Clinical Virology Unit, Cdim	Who Collaborating Centre For Reference And Research On Influenza
A/Sydney/15/2003	flu	EPI115356	2003-01-15	oceania	australia	new_south_wales	sydney	cell	?	?	?	Other Database Import
A/Okinawa/15/2003	flu	EPI173348	2003-01-16	japan_korea	japan	okinawa	okinawa	undetermined	?	?	?	Other Database Import
A/Denmark/9/2003	flu	EPI146300	2003-01-17	europe	denmark	denmark	denmark	undetermined	?	?	?	Other Database Import
A/Taiwan/22/2003	flu	EPI444675	2003-01-18	china	taiwan	taiwan	taiwan	cell	?	?	?	Other Database Import
A/HongKong/CUHK5627/2003	flu	EPI161196	2003-01-18	china	hong_kong	hong_kong	hong_kong	undetermined	?	?	?	Other Database Import
A/Taiwan/24/2003	flu	EPI444677	2003-01-19	china	taiwan	taiwan	taiwan	cell	?	?	?	Other Database Import
A/HongKong/CUHK5723/2003	flu	EPI161198	2003-01-20	china	hong_kong	hong_kong	hong_kong	undetermined	?	?	?	Other Database Import
A/NewYork/485/2003	flu	EPI84749	2003-01-20	north_america	usa	new_york	new_york	cell	?	?	?	Other Database Import
A/Liaoning/10/2003	flu	EPI360357	2003-01-20	china	china	liaoning	liaoning	undetermined	?	?	?	Other Database Import
A/Okinawa/26/2003	flu	EPI173351	2003-01-20	japan_korea	japan	okinawa	okinawa	undetermined	?	?	?	Other Database Import
A/Malaysia/24083/2003	flu	EPI372097	2003-01-21	southeast_asia	malaysia	malaysia	malaysia	undetermined	?	?	?	Other Database Import
A/Okinawa/29/2003	flu	EPI173353	2003-01-21	japan_korea	japan	okinawa	okinawa	undetermined	?	?	?	Other Database Import
A/Anhui/77/2003	flu	EPI360310	2003-01-22	china	china	anhui	anhui	undetermined	?	?	?	Other Database Import
A/Egypt/EG-2003900525/2003	flu	EPI146010	2003-01-23	africa	egypt	egypt	egypt	undetermined	?	?	?	Other Database Import
A/Okinawa/32/2003	flu	EPI173354	2003-01-23	japan_korea	japan	okinawa	okinawa	undetermined	?	?	?	Other Database Import
A/Egypt/900525/2003	flu	EPI157570	2003-01-23	africa	egypt	egypt	egypt	cell	?	?	?	Centers For Disease Control And Prevention
A/Japan/JA-RSP-03-493/2003	flu	EPI146054	2003-01-23	japan_korea	japan	japan	japan	undetermined	?	?	?	Other Database Import
A/Japan/493/2003	flu	EPI157834	2003-01-23	japan_korea	japan	japan	japan	cell	?	?	?	Centers For Disease Control And Prevention
A/Singapore/37/2003	flu	EPI1447538	2003-01-24	southeast_asia	singapore	singapore	singapore	cell	36y	female	Singapore General Hospital	Who Collaborating Centre For Reference And Research On Influenza
A/Vietnam/TN160/2003	flu	EPI395133	2003-01-24	southeast_asia	vietnam	vietnam	vietnam	undetermined	?	?	?	Other Database Import
A/Ireland/1215/2003	flu	EPI146320	2003-01-24	europe	ireland	ireland	ireland	undetermined	?	?	?	Other Database Import
A/Jilin/9/2003	flu	EPI360301	2003-01-25	china	china	jilin	jilin	undetermined	?	?	?	Other Database Import
A/Mexico/102/2003	flu	EPI157958	2003-01-27	north_america	mexico	mexico	mexico	cell	?	?	?	Centers For Disease Control And Prevention
A/Mexico/MX-102/2003	flu	EPI146088	2003-01-27	north_america	mexico	mexico	mexico	undetermined	?	?	?	Other Database Import
A/Wyoming/2/2003	flu	EPI116028	2003-01-28	north_america	usa	wyoming	wyoming	cell	?	?	?	Other Database Import
A/Japan/725/2003	flu	EPI157835	2003-01-29	japan_korea	japan	japan	japan	cell	?	?	?	Centers For Disease Control And Prevention
A/Okinawa/47/2003	flu	EPI173357	2003-01-30	japan_korea	japan	okinawa	okinawa	undetermined	?	?	?	Other Database Import
A/Japan/727/2003	flu	EPI157836	2003-01-30	japan_korea	japan	japan	japan	cell	?	?	?	Centers For Disease Control And Prevention
A/Okinawa/38/2003	flu	EPI173355	2003-01-30	japan_korea	japan	okinawa	okinawa	undetermined	?	?	?	Other Database Import
A/Okinawa/45/2003	flu	EPI173356	2003-01-31	japan_korea	japan	okinawa	okinawa	undetermined	?	?	?	Other Database Import
A/Okinawa/49/2003	flu	EPI173358	2003-01-31	japan_korea	japan	okinawa	okinawa	undetermined	?	?	?	Other Database Import
A/Sofia/141/2003	flu	EPI234884	2003-02-01	europe	bulgaria	sofia	sofia	undetermined	?	?	?	Other Database Import
A/TayNguyen/TN85/2003	flu	EPI353125	2003-02-01	southeast_asia	vietnam	dak_lak	tay_nguyen	cell	?	?	?	Other Database Import
A/Jilin/14/2003	flu	EPI234782	2003-02-01	china	china	jilin	jilin	undetermined	?	?	?	Other Database Import
A/TayNguyen/TN92/2003	flu	EPI353132	2003-02-01	southeast_asia	vietnam	dak_lak	tay_nguyen	cell	?	?	?	Other Database Import
A/Prague/34/2003	flu	EPI234881	2003-02-02	europe	czech_republic	bohemia	prague	undetermined	?	?	?	Other Database Import
A/HongKong/6205/2003	flu	EPI157765	2003-02-03	china	hong_kong	hong_kong	hong_kong	cell	?	?	?	Centers For Disease Control And Prevention
A/HongKong/HK-03V6205/2003	flu	EPI234761	2003-02-03	china	hong_kong	hong_kong	hong_kong	undetermined	?	?	?	Other Database Import
A/HongKong/V6205/2003	flu	EPI606156	2003-02-03	china	hong_kong	hong_kong	hong_kong	undetermined	?	?	?	Other Database Import
A/HongKong/CUHK6205/2003	flu	EPI161200	2003-02-03	china	hong_kong	hong_kong	hong_kong	undetermined	?	?	?	Other Database Import
A/Tianjin/92/2003	flu	EPI360305	2003-02-03	china	china	tianjin	tianjin	undetermined	?	?	?	Other Database Import
A/HongKong/CUHK6262/2003	flu	EPI161203	2003-02-04	china	hong_kong	hong_kong	hong_kong	undetermined	?	?	?	Other Database Import
A/NewYork/192/2003	flu	EPI52302	2003-02-04	north_america	usa	new_york	new_york	cell	?	?	?	Other Database Import
A/Moscow/28/2003	flu	EPI157987	2003-02-04	west_asia	russia	moscow	moscow	cell	?	?	?	Centers For Disease Control And Prevention
A/NewYork/194/2003	flu	EPI52587	2003-02-05	north_america	usa	new_york	new_york	cell	?	?	?	Other Database Import
A/Alaska/AK-V03-206/2003	flu	EPI234661	2003-02-05	north_america	usa	alaska	alaska	undetermined	?	?	?	Other Database Import
A/Taiwan/47/2003	flu	EPI444678	2003-02-05	china	taiwan	taiwan	taiwan	cell	?	?	?	Other Database Import
A/Lyon/476/2003	flu	EPI234789	2003-02-05	europe	france	auvergne_rhone_alpes	lyon	undetermined	?	?	?	Other Database Import
A/Austria/74466/2003	flu	EPI71371	2003-02-06	europe	austria	austria	austria	undetermined	?	?	?	Other Database Import
A/HongKong/CUHK6377/2003	flu	EPI161204	2003-02-07	china	hong_kong	hong_kong	hong_kong	undetermined	?	?	?	Other Database Import
A/HongKong/CUHK6383/2003	flu	EPI161205	2003-02-07	china	hong_kong	hong_kong	hong_kong	undetermined	?	?	?	Other Database Import
A/HongKong/CUHK6427/2003	flu	EPI161209	2003-02-08	china	hong_kong	hong_kong	hong_kong	undetermined	?	?	?	Other Database Import
A/HongKong/6385/2003	flu	EPI157766	2003-02-08	china	hong_kong	hong_kong	hong_kong	cell	?	?	?	Centers For Disease Control And Prevention
A/HongKong/HK-03V6385/2003	flu	EPI234762	2003-02-08	china	hong_kong	hong_kong	hong_kong	undetermined	?	?	?	Other Database Import
A/Christchurch/302/2003	flu	EPI1447413	2003-02-08	oceania	new_zealand	canterbury	christchurch	cell	50y	female	Canterbury Health Services	Who Collaborating Centre For Reference And Research On Influenza
A/Latvia/1506/2003	flu	EPI146296	2003-02-10	europe	latvia	latvia	latvia	undetermined	?	?	?	Other Database Import
A/NewYork/24/2003	flu	EPI53087	2003-02-10	north_america	usa	new_york	new_york	cell	?	?	?	Other Database Import
A/HongKong/CUHK6474/2003	flu	EPI161210	2003-02-10	china	hong_kong	hong_kong	hong_kong	undetermined	?	?	?	Other Database Import
A/Taiwan/58/2003	flu	EPI444679	2003-02-11	china	taiwan	taiwan	taiwan	cell	?	?	?	Other Database Import
A/WestVirginia/WV-159/2003	flu	EPI234972	2003-02-11	north_america	usa	west_virginia	west_virginia	undetermined	?	?	?	Other Database Import
A/WestVirginia/1/2003	flu	EPI234971	2003-02-11	north_america	usa	west_virginia	west_virginia	undetermined	?	?	?	Other Database Import
A/Austria/76036/2003	flu	EPI123356	2003-02-12	europe	austria	austria	austria	undetermined	?	?	?	Other Database Import
A/Beijing/68/2003	flu	EPI360313	2003-02-12	china	china	beijing	beijing	undetermined	?	?	?	Other Database Import
A/NewYork/NY-8548/2003	flu	EPI146146	2003-02-12	north_america	usa	new_york	new_york	undetermined	?	?	?	Other Database Import
A/Alaska/AK-V03-250/2003	flu	EPI234662	2003-02-12	north_america	usa	alaska	alaska	undetermined	?	?	?	Other Database Import
A/Chita/6/2003	flu	EPI234691	2003-02-12	west_asia	russia	zabaykalsky_krai	chita	undetermined	?	?	?	Other Database Import
A/Wyoming/WY-2003100054/2003	flu	EPI146266	2003-02-13	north_america	usa	wyoming	wyoming	undetermined	?	?	?	Other Database Import
A/Austria/76359/2003	flu	EPI123358	2003-02-13	europe	austria	austria	austria	undetermined	?	?	?	Other Database Import
A/Taiwan/59/2003	flu	EPI444680	2003-02-13	china	taiwan	taiwan	taiwan	cell	?	?	?	Other Database Import
A/Austria/76165/2003	flu	EPI71373	2003-02-14	europe	austria	austria	austria	undetermined	?	?	?	Other Database Import
A/Jilin/16/2003	flu	EPI234783	2003-02-15	china	china	jilin	jilin	undetermined	?	?	?	Other Database Import
A/Jilin/17/2003	flu	EPI234784	2003-02-16	china	china	jilin	jilin	undetermined	?	?	?	Other Database Import
A/Singapore/57/2003	flu	EPI1447543	2003-02-17	southeast_asia	singapore	singapore	singapore	cell	49y	female	Singapore General Hospital	Who Collaborating Centre For Reference And Research On Influenza
A/Thuringen/36/2003	flu	EPI146309	2003-02-17	europe	germany	thuringen	thuringen	undetermined	?	?	?	Other Database Import
A/Austria/76367/2003	flu	EPI71375	2003-02-17	europe	austria	austria	austria	undetermined	?	?	?	Other Database Import
A/Indonesia/14/2003	flu	EPI1447462	2003-02-18	southeast_asia	indonesia	indonesia	indonesia	cell	61y	?	U.s. Namru 2 Indonesia	Who Collaborating Centre For Reference And Research On Influenza
A/Netherlands/20/2003	flu	EPI362927	2003-02-18	europe	netherlands	netherlands	netherlands	cell	?	?	?	Other Database Import
A/NewYork/195/2003	flu	EPI53954	2003-02-18	north_america	usa	new_york	new_york	cell	?	?	?	Other Database Import
A/Jilin/18/2003	flu	EPI234785	2003-02-18	china	china	jilin	jilin	undetermined	?	?	?	Other Database Import
A/Austria/77193/2003	flu	EPI123362	2003-02-19	europe	austria	austria	austria	undetermined	?	?	?	Other Database Import
A/NewYork/196/2003	flu	EPI54126	2003-02-19	north_america	usa	new_york	new_york	cell	?	?	?	Other Database Import
A/NewYork/193/2003	flu	EPI52568	2003-02-19	north_america	usa	new_york	new_york	cell	?	?	?	Other Database Import
A/Austria/76866/2003	flu	EPI71377	2003-02-19	europe	austria	austria	austria	undetermined	?	?	?	Other Database Import
A/Netherlands/22/2003	flu	EPI362931	2003-02-23	europe	netherlands	netherlands	netherlands	cell	?	?	?	Other Database Import
A/HongKong/334/2003	flu	EPI157728	2003-02-24	china	hong_kong	hong_kong	hong_kong	cell	?	?	?	Centers For Disease Control And Prevention
A/Austria/77803/2003	flu	EPI71381	2003-02-24	europe	austria	austria	austria	undetermined	?	?	?	Other Database Import
A/Austria/77792/2003	flu	EPI71379	2003-02-24	europe	austria	austria	austria	undetermined	?	?	?	Other Database Import
A/Mexico/MX-325/2003	flu	EPI146093	2003-02-25	north_america	mexico	mexico	mexico	undetermined	?	?	?	Other Database Import
A/Minnesota/MN-VI2003-464-S0030494/2003	flu	EPI146074	2003-02-25	north_america	usa	minnesota	minnesota	undetermined	?	?	?	Other Database Import
A/Mexico/325/2003	flu	EPI157965	2003-02-25	north_america	mexico	mexico	mexico	cell	?	?	?	Centers For Disease Control And Prevention
A/Austria/77937/2003	flu	EPI71383	2003-02-25	europe	austria	austria	austria	undetermined	?	?	?	Other Database Import
A/Berlin/35/2003	flu	EPI234677	2003-02-27	europe	germany	berlin	berlin	undetermined	?	?	?	Other Database Import
A/Austria/79015/2003	flu	EPI71385	2003-02-28	europe	austria	austria	austria	undetermined	?	?	?	Other Database Import
A/Wisconsin/30/2003	flu	EPI116020	2003-02-28	north_america	usa	wisconsin	wisconsin	cell	?	?	?	Other Database Import
A/HongKong/664/2003	flu	EPI157767	2003-02-28	china	hong_kong	hong_kong	hong_kong	cell	?	?	?	Centers For Disease Control And Prevention
A/Arizona/AZ-994/2003	flu	EPI234675	2003-03-01	north_america	usa	arizona	arizona	undetermined	?	?	?	Other Database Import
A/Taiwan/63/2003	flu	EPI444681	2003-03-01	china	taiwan	taiwan	taiwan	cell	?	?	?	Other Database Import
A/HongKong/CUHK13299/2003	flu	EPI160996	2003-03-01	china	hong_kong	hong_kong	hong_kong	undetermined	?	?	?	Other Database Import
A/Parma/7/2003	flu	EPI234871	2003-03-02	europe	italy	emilia_romagna	parma	undetermined	?	?	?	Other Database Import
A/Trieste/2/2003	flu	EPI397687	2003-03-02	europe	italy	friuli_venezia_giulia	trieste	cell	?	?	Instituto Di Igiene	National Institute For Medical Research
A/Egypt/901386/2003	flu	EPI157571	2003-03-03	africa	egypt	egypt	egypt	cell	?	?	?	Centers For Disease Control And Prevention
A/HongKong/CUHK13434/2003	flu	EPI160998	2003-03-03	china	hong_kong	hong_kong	hong_kong	undetermined	?	?	?	Other Database Import
A/Egypt/EG-2003901386/2003	flu	EPI146011	2003-03-03	africa	egypt	egypt	egypt	undetermined	?	?	?	Other Database Import
A/Pune/31741/2003	flu	EPI606058	2003-03-03	south_asia	india	maharashtra	pune	undetermined	?	?	?	Other Database Import
A/Austria/79211/2003	flu	EPI71387	2003-03-03	europe	austria	austria	austria	undetermined	?	?	?	Other Database Import
A/HongKong/CUHK13339/2003	flu	EPI160997	2003-03-03	china	hong_kong	hong_kong	hong_kong	undetermined	?	?	?	Other Database Import
A/India/1741/2003	flu	EPI157804	2003-03-03	south_asia	india	india	india	cell	?	?	?	Centers For Disease Control And Prevention
A/India/II-031741-TS/2003	flu	EPI146049	2003-03-03	south_asia	india	india	india	undetermined	?	?	?	Other Database Import
A/HongKong/CUHK13483/2003	flu	EPI160999	2003-03-04	china	hong_kong	hong_kong	hong_kong	undetermined	?	?	?	Other Database Import
A/Austria/79524/2003	flu	EPI71391	2003-03-04	europe	austria	austria	austria	undetermined	?	?	?	Other Database Import
A/HongKong/530/2003	flu	EPI157764	2003-03-04	china	hong_kong	hong_kong	hong_kong	cell	?	?	?	Centers For Disease Control And Prevention
A/Austria/79477/2003	flu	EPI71389	2003-03-04	europe	austria	austria	austria	undetermined	?	?	?	Other Database Import
A/Netherlands/88/2003	flu	EPI362934	2003-03-05	europe	netherlands	netherlands	netherlands	cell	?	?	?	Other Database Import
A/Latvia/2754/2003	flu	EPI146298	2003-03-05	europe	latvia	latvia	latvia	undetermined	?	?	?	Other Database Import
A/Austria/79798/2003	flu	EPI71393	2003-03-05	europe	austria	austria	austria	undetermined	?	?	?	Other Database Import
A/Austria/80044/2003	flu	EPI123360	2003-03-05	europe	austria	austria	austria	undetermined	?	?	?	Other Database Import
A/HongKong/CUHK13527/2003	flu	EPI161001	2003-03-05	china	hong_kong	hong_kong	hong_kong	undetermined	?	?	?	Other Database Import
A/Austria/80039/2003	flu	EPI71395	2003-03-06	europe	austria	austria	austria	undetermined	?	?	?	Other Database Import
A/Tianjin/109/2003	flu	EPI360382	2003-03-06	china	china	tianjin	tianjin	undetermined	?	?	?	Other Database Import
A/Sydney/7/2003	flu	EPI1447572	2003-03-06	oceania	australia	new_south_wales	sydney	cell	34y	female	Clinical Virology Unit, Cdim	Who Collaborating Centre For Reference And Research On Influenza
A/HongKong/711/2003	flu	EPI157770	2003-03-07	china	hong_kong	hong_kong	hong_kong	cell	?	?	?	Centers For Disease Control And Prevention
A/Denmark/40/2003	flu	EPI146323	2003-03-07	europe	denmark	denmark	denmark	undetermined	?	?	?	Other Database Import
A/Hannover/154/2003	flu	EPI234746	2003-03-07	europe	germany	niedersachsen	hannover	undetermined	?	?	?	Other Database Import
A/Austria/80361/2003	flu	EPI71399	2003-03-07	europe	austria	austria	austria	undetermined	?	?	?	Other Database Import
A/NewYork/198/2003	flu	EPI52909	2003-03-08	north_america	usa	new_york	new_york	cell	?	?	?	Other Database Import
A/UnitedKingdom/1861-CDC-20030709-ROW-12/2003	flu	EPI145174	2003-03-08	europe	united_kingdom	united_kingdom	united_kingdom	undetermined	?	?	?	Other Database Import
A/Darwin/4/2003	flu	EPI1447443	2003-03-09	oceania	australia	northern_territory	darwin	cell	20y	male	Royal Darwin Hospital	Who Collaborating Centre For Reference And Research On Influenza
A/Malaysia/226/2003	flu	EPI1447474	2003-03-10	southeast_asia	malaysia	malaysia	malaysia	cell	?	?	Institut Penyelidikan Perubatan	Who Collaborating Centre For Reference And Research On Influenza
A/Austria/80746/2003	flu	EPI71403	2003-03-10	europe	austria	austria	austria	undetermined	?	?	?	Other Database Import
A/Austria/80675/2003	flu	EPI71401	2003-03-10	europe	austria	austria	austria	undetermined	?	?	?	Other Database Import
A/Arizona/AZ-300637/2003	flu	EPI234669	2003-03-11	north_america	usa	arizona	arizona	undetermined	?	?	?	Other Database Import
A/HongKong/712/2003	flu	EPI157771	2003-03-11	china	hong_kong	hong_kong	hong_kong	cell	?	?	?	Centers For Disease Control And Prevention
A/Austria/80933/2003	flu	EPI71405	2003-03-11	europe	austria	austria	austria	undetermined	?	?	?	Other Database Import
A/Mexico/503/2003	flu	EPI157971	2003-03-11	north_america	mexico	mexico	mexico	cell	?	?	?	Centers For Disease Control And Prevention
A/Austria/80991/2003	flu	EPI71407	2003-03-11	europe	austria	austria	austria	undetermined	?	?	?	Other Database Import
A/Mexico/MX-503/2003	flu	EPI146094	2003-03-11	north_america	mexico	mexico	mexico	undetermined	?	?	?	Other Database Import
A/Austria/81720/2003	flu	EPI71409	2003-03-13	europe	austria	austria	austria	undetermined	?	?	?	Other Database Import
A/NewYork/NY-03-1484/2003	flu	EPI146130	2003-03-14	north_america	usa	new_york	new_york	undetermined	?	?	?	Other Database Import
A/NewYork/197/2003	flu	EPI54145	2003-03-14	north_america	usa	new_york	new_york	cell	?	?	?	Other Database Import
A/NewYork/68/2003	flu	EPI115936	2003-03-14	north_america	usa	new_york	new_york	cell	?	?	?	Other Database Import
A/Italy/1997/2003	flu	EPI157831	2003-03-14	europe	italy	italy	italy	cell	?	?	?	Centers For Disease Control And Prevention
A/Italy/IT-RSP-03-1997/2003	flu	EPI146053	2003-03-14	europe	italy	italy	italy	undetermined	?	?	?	Other Database Import
A/HongKong/797/2003	flu	EPI157772	2003-03-17	china	hong_kong	hong_kong	hong_kong	cell	?	?	?	Centers For Disease Control And Prevention
A/Auckland/1/2003	flu	EPI1447344	2003-03-17	oceania	new_zealand	auckland	auckland	cell	3m	male	Auckland Healthcare	Who Collaborating Centre For Reference And Research On Influenza
A/Netherlands/109/2003	flu	EPI364393	2003-03-17	europe	netherlands	netherlands	netherlands	cell	?	?	?	Other Database Import
A/Austria/82615/2003	flu	EPI71411	2003-03-18	europe	austria	austria	austria	undetermined	?	?	?	Other Database Import
A/Yunnan/184/2003	flu	EPI360397	2003-03-19	china	china	yunnan	yunnan	undetermined	?	?	?	Other Database Import
A/Austria/82895/2003	flu	EPI71413	2003-03-19	europe	austria	austria	austria	undetermined	?	?	?	Other Database Import
A/Yucatan/844/2003	flu	EPI156265	2003-03-19	north_america	mexico	mexico	yucatan	cell	?	?	?	Other Database Import
A/Iceland/22/2003	flu	EPI146299	2003-03-19	europe	iceland	iceland	iceland	undetermined	?	?	?	Other Database Import
A/Austria/83327/2003	flu	EPI71417	2003-03-20	europe	austria	austria	austria	undetermined	?	?	?	Other Database Import
A/Austria/83275/2003	flu	EPI71415	2003-03-20	europe	austria	austria	austria	undetermined	?	?	?	Other Database Import
A/Christchurch/2/2003	flu	EPI1447407	2003-03-20	oceania	new_zealand	canterbury	christchurch	cell	39y	female	Canterbury Health Services	Who Collaborating Centre For Reference And Research On Influenza
A/HongKong/911/2003	flu	EPI157773	2003-03-20	china	hong_kong	hong_kong	hong_kong	cell	?	?	?	Centers For Disease Control And Prevention
A/Arizona/AZ-300763/2003	flu	EPI234670	2003-03-20	north_america	usa	arizona	arizona	undetermined	?	?	?	Other Database Import
A/Yucatan/ME6057/2003	flu	EPI156273	2003-03-20	north_america	mexico	mexico	yucatan	cell	?	?	?	Other Database Import
A/Greece/109/2003	flu	EPI146294	2003-03-21	europe	greece	greece	greece	undetermined	?	?	?	Other Database Import
A/Brisbane/1/2003	flu	EPI1447357	2003-03-21	oceania	australia	queensland	brisbane	cell	57y	male	Queensland Health Scientific Services	Who Collaborating Centre For Reference And Research On Influenza
A/NewYork/199/2003	flu	EPI53479	2003-03-21	north_america	usa	new_york	new_york	cell	?	?	?	Other Database Import
A/Michigan/16/2003	flu	EPI115913	2003-03-22	north_america	usa	michigan	michigan	cell	?	?	?	Other Database Import
A/Michigan/MI-M03VC614/2003	flu	EPI146070	2003-03-22	north_america	usa	michigan	michigan	undetermined	?	?	?	Other Database Import
A/Indonesia/22/2003	flu	EPI1447464	2003-03-25	southeast_asia	indonesia	indonesia	indonesia	cell	36y	?	U.s. Namru 2 Indonesia	Who Collaborating Centre For Reference And Research On Influenza
A/Mexico/736/2003	flu	EPI157974	2003-03-27	north_america	mexico	mexico	mexico	cell	?	?	?	Centers For Disease Control And Prevention
A/Mexico/MX-736/2003	flu	EPI146095	2003-03-27	north_america	mexico	mexico	mexico	undetermined	?	?	?	Other Database Import
A/HongKong/992/2003	flu	EPI157777	2003-03-28	china	hong_kong	hong_kong	hong_kong	cell	?	?	?	Centers For Disease Control And Prevention
A/HongKong/995/2003	flu	EPI157778	2003-03-29	china	hong_kong	hong_kong	hong_kong	cell	?	?	?	Centers For Disease Control And Prevention
A/Hunan/123/2003	flu	EPI360350	2003-03-30	china	china	hunan	hunan	undetermined	?	?	?	Other Database Import
A/Victoria/301/2003	flu	EPI1447616	2003-03-31	oceania	australia	victoria	victoria	cell	6y	?	Royal Chidrens Hospital	Who Collaborating Centre For Reference And Research On Influenza
A/Austria/85718/2003	flu	EPI71419	2003-03-31	europe	austria	austria	austria	undetermined	?	?	?	Other Database Import
A/Victoria/302/2003	flu	EPI1447618	2003-03-31	oceania	australia	victoria	victoria	cell	6y	?	Royal Chidrens Hospital	Who Collaborating Centre For Reference And Research On Influenza
A/Perth/1/2003	flu	EPI1447507	2003-04-02	oceania	australia	western_australia	perth	cell	?	?	Pathwest Qe Ii Medical Centre	Who Collaborating Centre For Reference And Research On Influenza
A/Wisconsin/WI-03-VI-13573/2003	flu	EPI146236	2003-04-02	north_america	usa	wisconsin	wisconsin	undetermined	?	?	?	Other Database Import
A/HongKong/1052/2003	flu	EPI157677	2003-04-03	china	hong_kong	hong_kong	hong_kong	cell	?	?	?	Centers For Disease Control And Prevention
A/NewYork/202/2003	flu	EPI53258	2003-04-05	north_america	usa	new_york	new_york	cell	?	?	?	Other Database Import
A/Hunan/136/2003	flu	EPI360351	2003-04-06	china	china	hunan	hunan	undetermined	?	?	?	Other Database Import
A/Guangxi/194/2003	flu	EPI360334	2003-04-06	china	china	guangxi	guangxi	undetermined	?	?	?	Other Database Import
A/Alaska/AK-V03-708/2003	flu	EPI234664	2003-04-07	north_america	usa	alaska	alaska	undetermined	?	?	?	Other Database Import
A/Alaska/17/2003	flu	EPI115835	2003-04-07	north_america	usa	alaska	alaska	cell	?	?	?	Other Database Import
A/Romania/RO-972-03/2003	flu	EPI146164	2003-04-08	europe	romania	romania	romania	undetermined	?	?	?	Other Database Import
A/NewYork/201/2003	flu	EPI53764	2003-04-10	north_america	usa	new_york	new_york	cell	?	?	?	Other Database Import
A/Pune/32699/2003	flu	EPI606944	2003-04-11	south_asia	india	maharashtra	pune	undetermined	?	?	?	Other Database Import
A/Brisbane/3/2003	flu	EPI1447370	2003-04-11	oceania	australia	queensland	brisbane	cell	3y	female	Queensland Health Scientific Services	Who Collaborating Centre For Reference And Research On Influenza
A/Oslo/3385/2003	flu	EPI234870	2003-04-13	europe	norway	ostlandet	oslo	undetermined	?	?	?	Other Database Import
A/Brisbane/5/2003	flu	EPI1447377	2003-04-14	oceania	australia	queensland	brisbane	cell	32y	female	Queensland Health Scientific Services	Who Collaborating Centre For Reference And Research On Influenza
A/Dunedin/27/2003	flu	EPI1447452	2003-04-14	oceania	new_zealand	otago	dunedin	cell	60y	male	Institute Of Environmental Science & Research	Who Collaborating Centre For Reference And Research On Influenza
A/Shanghai/370/2003	flu	EPI360378	2003-04-15	china	china	shanghai	shanghai	undetermined	?	?	?	Other Database Import
A/Hunan/167/2003	flu	EPI157783	2003-04-15	china	china	hunan	hunan	cell	?	?	?	Centers For Disease Control And Prevention
A/Fujian/217/2003	flu	EPI360323	2003-04-16	china	china	fujian	fujian	undetermined	?	?	?	Other Database Import
A/Guangxi/150/2003	flu	EPI360298	2003-04-16	china	china	guangxi	guangxi	undetermined	?	?	?	Other Database Import
A/Shanghai/369/2003	flu	EPI234883	2003-04-16	china	china	shanghai	shanghai	undetermined	?	?	Centers For Disease Control And Prevention	Other Database Import
A/Christchurch/4/2003	flu	EPI1447426	2003-04-18	oceania	new_zealand	canterbury	christchurch	cell	53y	female	Canterbury Health Services	Who Collaborating Centre For Reference And Research On Influenza
A/Christchurch/3/2003	flu	EPI1447412	2003-04-20	oceania	new_zealand	canterbury	christchurch	cell	22y	male	Canterbury Health Services	Who Collaborating Centre For Reference And Research On Influenza
A/Guangdong/132/2003	flu	EPI360307	2003-04-20	china	china	guangdong	guangdong	undetermined	?	?	?	Other Database Import
A/Christchurch/9/2003	flu	EPI1447683	2003-04-20	oceania	new_zealand	canterbury	christchurch	cell	74y	male	Canterbury Health Services	Who Collaborating Centre For Reference And Research On Influenza
A/NewYork/213/2003	flu	EPI53821	2003-04-22	north_america	usa	new_york	new_york	cell	?	?	?	Other Database Import
A/Malaysia/434/2003	flu	EPI1447483	2003-04-22	southeast_asia	malaysia	malaysia	malaysia	cell	?	?	Institut Penyelidikan Perubatan	Who Collaborating Centre For Reference And Research On Influenza
A/NewYork/NY-03-1626/2003	flu	EPI146131	2003-04-22	north_america	usa	new_york	new_york	undetermined	?	?	?	Other Database Import
A/NewYork/216/2003	flu	EPI54183	2003-04-22	north_america	usa	new_york	new_york	cell	?	?	?	Other Database Import
A/Guangzhou/768/2003	flu	EPI157629	2003-04-22	china	china	guangdong	guangzhou	cell	?	?	?	Centers For Disease Control And Prevention
A/NewYork/215/2003	flu	EPI54164	2003-04-22	north_america	usa	new_york	new_york	cell	?	?	?	Other Database Import
A/NewYork/214/2003	flu	EPI92302	2003-04-23	north_america	usa	new_york	new_york	cell	?	?	?	Other Database Import
A/Texas/17/2003	flu	EPI115964	2003-04-23	north_america	usa	texas	texas	cell	?	?	?	Other Database Import
A/Texas/TX-VC3-1265/2003	flu	EPI234937	2003-04-23	north_america	usa	texas	texas	undetermined	?	?	?	Other Database Import
A/Hunan/195/2003	flu	EPI360348	2003-04-27	china	china	hunan	hunan	undetermined	?	?	?	Other Database Import
A/Wisconsin/31/2003	flu	EPI116022	2003-04-29	north_america	usa	wisconsin	wisconsin	cell	?	?	?	Other Database Import
A/Wisconsin/WI-03VI17748/2003	flu	EPI146238	2003-04-29	north_america	usa	wisconsin	wisconsin	undetermined	?	?	?	Other Database Import
A/Christchurch/42/2003	flu	EPI1447428	2003-05-02	oceania	new_zealand	canterbury	christchurch	cell	91y	male	Canterbury Health Services	Who Collaborating Centre For Reference And Research On Influenza
A/Bangladesh/1164729/2003	flu	EPI157429	2003-05-06	south_asia	bangladesh	bangladesh	bangladesh	cell	?	?	?	Centers For Disease Control And Prevention
A/Bangladesh/BA-1164729/2003	flu	EPI234656	2003-05-06	south_asia	bangladesh	bangladesh	bangladesh	undetermined	?	?	?	Other Database Import
A/Wellington/1/2003	flu	EPI1447655	2003-05-06	oceania	new_zealand	wellington	wellington	cell	21y	female	Institute Of Environmental Science & Research	Who Collaborating Centre For Reference And Research On Influenza
A/Washington/WA-V13-998/2003	flu	EPI234965	2003-05-06	north_america	usa	washington	washington	undetermined	?	?	?	Other Database Import
A/Wuhan/144/2003	flu	EPI360390	2003-05-07	china	china	hubei	wuhan	undetermined	?	?	?	Other Database Import
A/NewYork/203/2003	flu	EPI53972	2003-05-07	north_america	usa	new_york	new_york	cell	?	?	?	Other Database Import
A/Chile/CI-03-6267/2003	flu	EPI145986	2003-05-12	south_america	chile	chile	chile	undetermined	?	?	?	Other Database Import
A/SouthDakota/SD-VR1197-03/2003	flu	EPI234897	2003-05-12	north_america	usa	south_dakota	south_dakota	undetermined	?	?	?	Other Database Import
A/Chile/6267/2003	flu	EPI157523	2003-05-12	south_america	chile	chile	chile	cell	?	?	?	Centers For Disease Control And Prevention
A/Chile/6421/2003	flu	EPI157524	2003-05-13	south_america	chile	chile	chile	cell	?	?	?	Centers For Disease Control And Prevention
A/Chile/CI-03-6421/2003	flu	EPI145987	2003-05-13	south_america	chile	chile	chile	undetermined	?	?	?	Other Database Import
A/Wuhan/154/2003	flu	EPI360386	2003-05-14	china	china	hubei	wuhan	undetermined	?	?	?	Other Database Import
A/Wuhan/166/2003	flu	EPI360391	2003-05-17	china	china	hubei	wuhan	undetermined	?	?	?	Other Database Import
A/Vietnam/TN107/2003	flu	EPI395125	2003-05-18	southeast_asia	vietnam	vietnam	vietnam	undetermined	?	?	?	Other Database Import
A/Wellington/3/2003	flu	EPI35206	2003-05-19	oceania	new_zealand	wellington	wellington	cell	4y	male	Institute Of Environmental Science & Research	Other Database Import
A/Hunan/245/2003	flu	EPI157785	2003-05-20	china	china	hunan	hunan	cell	?	?	?	Centers For Disease Control And Prevention
A/SouthDakota/9/2003	flu	EPI115952	2003-05-20	north_america	usa	south_dakota	south_dakota	cell	?	?	?	Other Database Import
A/Waikato/1/2003	flu	EPI35244	2003-05-20	oceania	new_zealand	waikato	waikato	cell	9y	male	Institute Of Environmental Science & Research	Other Database Import
A/Fujian/325/2003	flu	EPI26554	2003-05-21	china	china	fujian	fujian	undetermined	?	?	?	Other Database Import
A/Mexico/1066/2003	flu	EPI157959	2003-05-22	north_america	mexico	mexico	mexico	cell	?	?	?	Centers For Disease Control And Prevention
A/Mexico/MX-1066/2003	flu	EPI146089	2003-05-22	north_america	mexico	mexico	mexico	undetermined	?	?	?	Other Database Import
A/Vietnam/TN116/2003	flu	EPI395128	2003-05-22	southeast_asia	vietnam	vietnam	vietnam	undetermined	?	?	?	Other Database Import
A/Wellington/4/2003	flu	EPI35225	2003-05-22	oceania	new_zealand	wellington	wellington	cell	?	?	?	Other Database Import
A/ElSalvador/12/2003	flu	EPI157573	2003-05-23	north_america	el_salvador	el_salvador	el_salvador	cell	?	?	?	Centers For Disease Control And Prevention
A/Jiangxi/20/2003	flu	EPI360356	2003-05-24	china	china	jiangxi	jiangxi	undetermined	?	?	?	Other Database Import
A/Brisbane/6/2003	flu	EPI1447379	2003-05-24	oceania	australia	queensland	brisbane	cell	49y	male	Queensland Health Scientific Services	Who Collaborating Centre For Reference And Research On Influenza
A/Sydney/9/2003	flu	EPI1447574	2003-05-25	oceania	australia	new_south_wales	sydney	cell	83y	?	Clinical Virology Unit, Cdim	Who Collaborating Centre For Reference And Research On Influenza
A/Hunan/284/2003	flu	EPI360341	2003-05-26	china	china	hunan	hunan	undetermined	?	?	?	Other Database Import
A/Hunan/274/2003	flu	EPI360349	2003-05-26	china	china	hunan	hunan	undetermined	?	?	?	Other Database Import
A/Auckland/14/2003	flu	EPI1447345	2003-05-28	oceania	new_zealand	auckland	auckland	cell	20y	male	Auckland Healthcare	Who Collaborating Centre For Reference And Research On Influenza
A/Guangxi/177/2003	flu	EPI360332	2003-05-29	china	china	guangxi	guangxi	undetermined	?	?	?	Other Database Import
A/Wellington/10/2003	flu	EPI35263	2003-05-30	oceania	new_zealand	wellington	wellington	cell	?	?	?	Other Database Import
A/Wellington/9/2003	flu	EPI37448	2003-05-30	oceania	new_zealand	wellington	wellington	cell	?	?	?	Other Database Import
A/Argentina/R447/2003	flu	EPI157399	2003-06-02	south_america	argentina	argentina	argentina	cell	?	?	?	Centers For Disease Control And Prevention
A/Chile/7379/2003	flu	EPI157527	2003-06-03	south_america	chile	chile	chile	cell	?	?	?	Centers For Disease Control And Prevention
A/Chile/CI-03-7379/2003	flu	EPI145988	2003-06-03	south_america	chile	chile	chile	undetermined	?	?	?	Other Database Import
A/Johannesburg/17/2003	flu	EPI1447468	2003-06-03	africa	south_africa	gauteng	johannesburg	cell	23y	?	National Institute For Communicable Disease	Who Collaborating Centre For Reference And Research On Influenza
A/Tak/185/2003	flu	EPI1447590	2003-06-05	southeast_asia	thailand	tak	tak	cell	3y	female	Who National Influenza Centre, National Institute Of Medical Research (nimr)	Who Collaborating Centre For Reference And Research On Influenza
A/Guangdong/302/2003	flu	EPI360331	2003-06-06	china	china	guangdong	guangdong	undetermined	?	?	?	Other Database Import
A/Guangxi/191/2003	flu	EPI360333	2003-06-06	china	china	guangxi	guangxi	undetermined	?	?	?	Other Database Import
A/Sydney/10/2003	flu	EPI1447556	2003-06-07	oceania	australia	new_south_wales	sydney	cell	12y	?	Clinical Virology Unit, Cdim	Who Collaborating Centre For Reference And Research On Influenza
A/Hunan/328/2003	flu	EPI360343	2003-06-09	china	china	hunan	hunan	undetermined	?	?	?	Other Database Import
A/ElSalvador/36/2003	flu	EPI157574	2003-06-09	north_america	el_salvador	el_salvador	el_salvador	cell	?	?	?	Centers For Disease Control And Prevention
A/Wellington/17/2003	flu	EPI1447657	2003-06-11	oceania	new_zealand	wellington	wellington	cell	16y	male	Institute Of Environmental Science & Research	Who Collaborating Centre For Reference And Research On Influenza
A/Waikato/3/2003	flu	EPI35282	2003-06-11	oceania	new_zealand	waikato	waikato	undetermined	19y	female	Institute Of Environmental Science & Research	Other Database Import
A/Argentina/R517/2003	flu	EPI157400	2003-06-12	south_america	argentina	argentina	argentina	cell	?	?	?	Centers For Disease Control And Prevention
A/Argentina/AG-R517-03/2003	flu	EPI145938	2003-06-12	south_america	argentina	argentina	argentina	undetermined	?	?	?	Other Database Import
A/Chile/CI-03-7985/2003	flu	EPI145989	2003-06-12	south_america	chile	chile	chile	undetermined	?	?	?	Other Database Import
A/Chile/7985/2003	flu	EPI157528	2003-06-12	south_america	chile	chile	chile	cell	?	?	?	Centers For Disease Control And Prevention
A/Uruguay/PA4/2003	flu	EPI158296	2003-06-14	south_america	uruguay	uruguay	uruguay	cell	?	?	?	Centers For Disease Control And Prevention
A/Uruguay/UY-PA03-4/2003	flu	EPI146220	2003-06-14	south_america	uruguay	uruguay	uruguay	undetermined	?	?	?	Other Database Import
A/Uruguay/4/2003	flu	EPI608366	2003-06-14	south_america	uruguay	uruguay	uruguay	undetermined	?	?	?	Other Database Import
A/Vietnam/TN101/2003	flu	EPI395127	2003-06-15	southeast_asia	vietnam	vietnam	vietnam	undetermined	?	?	?	Other Database Import
A/Auckland/20/2003	flu	EPI545321	2003-06-15	oceania	new_zealand	auckland	auckland	cell	5y	female	Auckland Healthcare	Other Database Import
A/Vietnam/BM766/2003	flu	EPI395129	2003-06-16	southeast_asia	vietnam	vietnam	vietnam	undetermined	?	?	?	Other Database Import
A/Auckland/6/2003	flu	EPI1447352	2003-06-16	oceania	new_zealand	auckland	auckland	cell	?	female	Auckland Healthcare	Who Collaborating Centre For Reference And Research On Influenza
A/Madagascar/70081/2003	flu	EPI347421	2003-06-16	africa	madagascar	madagascar	madagascar	cell	?	?	Institut Pasteur De Madagascar	National Institute For Medical Research
A/Hanoi/BM766/2003	flu	EPI368485	2003-06-16	southeast_asia	vietnam	hanoi	hanoi	cell	9m	?	?	Other Database Import
A/Hanoi/BM767/2003	flu	EPI368493	2003-06-16	southeast_asia	vietnam	hanoi	hanoi	cell	5y	?	?	Other Database Import
A/Waikato/15/2003	flu	EPI39303	2003-06-16	oceania	new_zealand	waikato	waikato	cell	?	?	?	Other Database Import
A/Canterbury/393/2003	flu	EPI92587	2003-06-16	oceania	new_zealand	canterbury	canterbury	cell	?	?	?	Other Database Import
A/HongKong/1159/2003	flu	EPI157678	2003-06-16	china	hong_kong	hong_kong	hong_kong	cell	?	?	?	Centers For Disease Control And Prevention
A/Brazil/BR-1609/2003	flu	EPI145973	2003-06-17	south_america	brazil	brazil	brazil	undetermined	?	?	?	Other Database Import
A/Christchurch/8/2003	flu	EPI1447432	2003-06-17	oceania	new_zealand	canterbury	christchurch	cell	1y	female	Canterbury Health Services	Who Collaborating Centre For Reference And Research On Influenza
A/Christchurch/46/2003	flu	EPI1447430	2003-06-17	oceania	new_zealand	canterbury	christchurch	cell	31y	female	Canterbury Health Services	Who Collaborating Centre For Reference And Research On Influenza
A/Brazil/1609/2003	flu	EPI157448	2003-06-17	south_america	brazil	brazil	brazil	cell	?	?	?	Centers For Disease Control And Prevention
A/HongKong/1160/2003	flu	EPI157679	2003-06-17	china	hong_kong	hong_kong	hong_kong	cell	?	?	?	Centers For Disease Control And Prevention
A/Christchurch/7/2003	flu	EPI1447731	2003-06-17	oceania	new_zealand	canterbury	christchurch	cell	4y	male	Canterbury Health Services	Who Collaborating Centre For Reference And Research On Influenza
A/Texas/TX-AC-19535/2003	flu	EPI234930	2003-06-18	north_america	usa	texas	texas	undetermined	?	?	?	Other Database Import
A/Wellington/25/2003	flu	EPI35301	2003-06-18	oceania	new_zealand	wellington	wellington	cell	?	?	?	Other Database Import
A/Chile/CI-03-8299/2003	flu	EPI145991	2003-06-19	south_america	chile	chile	chile	undetermined	?	?	?	Other Database Import
A/Chile/CI-03-8266-ORIGINAL/2003	flu	EPI145990	2003-06-19	south_america	chile	chile	chile	undetermined	?	?	?	Other Database Import
A/Chile/8299/2003	flu	EPI606832	2003-06-19	south_america	chile	chile	chile	undetermined	?	?	?	Other Database Import
A/Brazil/1544/2003	flu	EPI157447	2003-06-20	south_america	brazil	brazil	brazil	cell	?	?	?	Centers For Disease Control And Prevention
A/Hunan/357/2003	flu	EPI360300	2003-06-20	china	china	hunan	hunan	undetermined	?	?	?	Other Database Import
A/Brazil/BR-IAL1544/2003	flu	EPI145983	2003-06-20	south_america	brazil	brazil	brazil	undetermined	?	?	?	Other Database Import
A/HongKong/1173/2003	flu	EPI157680	2003-06-20	china	hong_kong	hong_kong	hong_kong	cell	?	?	?	Centers For Disease Control And Prevention
A/Christchurch/19/2003	flu	EPI1447405	2003-06-20	oceania	new_zealand	canterbury	christchurch	cell	34y	female	Canterbury Health Services	Who Collaborating Centre For Reference And Research On Influenza
A/Waikato/21/2003	flu	EPI38550	2003-06-21	oceania	new_zealand	waikato	waikato	cell	?	?	?	Other Database Import
A/Waikato/154/2003	flu	EPI36099	2003-06-21	oceania	new_zealand	waikato	waikato	cell	?	?	?	Other Database Import
A/Waikato/155/2003	flu	EPI36726	2003-06-22	oceania	new_zealand	waikato	waikato	cell	?	?	?	Other Database Import
A/Waikato/156/2003	flu	EPI36745	2003-06-22	oceania	new_zealand	waikato	waikato	cell	?	?	?	Other Database Import
A/Waikato/29/2003	flu	EPI36764	2003-06-23	oceania	new_zealand	waikato	waikato	cell	?	?	?	Other Database Import
A/Dunedin/1/2003	flu	EPI1447447	2003-06-23	oceania	new_zealand	otago	dunedin	cell	34y	female	Institute Of Environmental Science & Research	Who Collaborating Centre For Reference And Research On Influenza
A/Chanthaburi/219/2003	flu	EPI1447394	2003-06-24	southeast_asia	thailand	chanthaburi	chanthaburi	cell	73y	female	Who National Influenza Centre, National Institute Of Medical Research (nimr)	Who Collaborating Centre For Reference And Research On Influenza
A/Wellington/28/2003	flu	EPI35320	2003-06-24	oceania	new_zealand	wellington	wellington	cell	?	?	?	Other Database Import
A/Waikato/46/2003	flu	EPI38569	2003-06-24	oceania	new_zealand	waikato	waikato	cell	?	?	?	Other Database Import
A/Christchurch/28/2003	flu	EPI585681	2003-06-24	oceania	new_zealand	canterbury	christchurch	cell	?	?	?	Other Database Import
A/Waikato/42/2003	flu	EPI1447653	2003-06-25	oceania	new_zealand	waikato	waikato	cell	16y	female	Institute Of Environmental Science & Research	Who Collaborating Centre For Reference And Research On Influenza
A/Waikato/122/2003	flu	EPI36821	2003-06-25	oceania	new_zealand	waikato	waikato	undetermined	?	?	?	Other Database Import
A/Brisbane/7/2003	flu	EPI1447389	2003-06-26	oceania	australia	queensland	brisbane	cell	4y	female	Queensland Health Scientific Services	Who Collaborating Centre For Reference And Research On Influenza
A/Brazil/IAL1727/2003	flu	EPI157462	2003-06-26	south_america	brazil	brazil	brazil	cell	?	?	?	Centers For Disease Control And Prevention
A/Waikato/94/2003	flu	EPI38626	2003-06-27	oceania	new_zealand	waikato	waikato	cell	?	?	?	Other Database Import
A/Waikato/91/2003	flu	EPI36118	2003-06-28	oceania	new_zealand	waikato	waikato	cell	?	?	?	Other Database Import
A/Victoria/105/2003	flu	EPI1447608	2003-06-28	oceania	australia	victoria	victoria	cell	52y	male	Victorian Infectious Diseases Reference Laboratory	Who Collaborating Centre For Reference And Research On Influenza
A/Chile/CI-03-8806/2003	flu	EPI145992	2003-06-30	south_america	chile	chile	chile	undetermined	?	?	?	Other Database Import
A/Chile/8806/2003	flu	EPI157532	2003-06-30	south_america	chile	chile	chile	cell	?	?	?	Centers For Disease Control And Prevention
A/Dakar/19/2003	flu	EPI347420	2003-06-30	africa	senegal	dakar	dakar	cell	?	?	Institut Pasteur De Dakar	National Institute For Medical Research
A/Waikato/61/2003	flu	EPI35339	2003-06-30	oceania	new_zealand	waikato	waikato	undetermined	?	?	?	Other Database Import
A/Canterbury/394/2003	flu	EPI92606	2003-06-30	oceania	new_zealand	canterbury	canterbury	cell	?	?	?	Other Database Import
A/Wellington/34/2003	flu	EPI36080	2003-06-30	oceania	new_zealand	wellington	wellington	undetermined	23y	male	Institute Of Environmental Science & Research	Other Database Import
A/Wellington/38/2003	flu	EPI1447660	2003-06-30	oceania	new_zealand	wellington	wellington	cell	12y	female	Institute Of Environmental Science & Research	Who Collaborating Centre For Reference And Research On Influenza
A/Wuhan/211/2003	flu	EPI158307	2003-06-30	china	china	hubei	wuhan	cell	?	?	?	Centers For Disease Control And Prevention
A/Wuhan/214/2003	flu	EPI158308	2003-06-30	china	china	hubei	wuhan	cell	?	?	?	Centers For Disease Control And Prevention
A/Australia/NHRC0001/2003	flu	EPI318736	2003-07-01	oceania	australia	australia	australia	unpassaged	?	?	?	Other Database Import
[truncated: 20,755 more rows]
