# Supplementary material for: Integrating genotypes and phenotypes improves long-term forecasts of seasonal influenza A/H3N2 evolution
Source: eLife. 2020 Sep 2;9:e60067. doi: 10.7554/eLife.60067 (PMC7553778; doi:10.7554/eLife.60067)
Supplement: Table 4—source data 1. [file elife-60067-table4-data1.csv]

model	predictor	timepoint	coefficient
true fitness	normalized_fitness	2023-10-01	8.439
true fitness	normalized_fitness	2024-04-01	8.602
true fitness	normalized_fitness	2024-10-01	8.647
true fitness	normalized_fitness	2025-04-01	8.843
true fitness	normalized_fitness	2025-10-01	9.117
true fitness	normalized_fitness	2026-04-01	8.691
true fitness	normalized_fitness	2026-10-01	7.894
true fitness	normalized_fitness	2027-04-01	6.351
true fitness	normalized_fitness	2027-10-01	7.978
true fitness	normalized_fitness	2028-04-01	9.373
true fitness	normalized_fitness	2028-10-01	9.323
true fitness	normalized_fitness	2029-04-01	10.136
true fitness	normalized_fitness	2029-10-01	9.954
true fitness	normalized_fitness	2030-04-01	9.484
true fitness	normalized_fitness	2030-10-01	9.422
true fitness	normalized_fitness	2031-04-01	9.276
true fitness	normalized_fitness	2031-10-01	9.484
true fitness	normalized_fitness	2032-04-01	10.392
true fitness	normalized_fitness	2032-10-01	10.496
true fitness	normalized_fitness	2033-04-01	10.486
true fitness	normalized_fitness	2033-10-01	10.306
true fitness	normalized_fitness	2034-04-01	9.915
true fitness	normalized_fitness	2034-10-01	10.408
true fitness	normalized_fitness	2035-04-01	9.881
true fitness	normalized_fitness	2035-10-01	9.631
true fitness	normalized_fitness	2036-04-01	10.121
true fitness	normalized_fitness	2036-10-01	9.903
true fitness	normalized_fitness	2037-04-01	10.36
true fitness	normalized_fitness	2037-10-01	10.087
true fitness	normalized_fitness	2038-04-01	10.013
true fitness	normalized_fitness	2038-10-01	8.665
true fitness	normalized_fitness	2039-04-01	8.66
true fitness	normalized_fitness	2039-10-01	8.958
epitope ancestor	ep_star	2023-10-01	0.353
epitope ancestor	ep_star	2024-04-01	0.365
epitope ancestor	ep_star	2024-10-01	0.179
epitope ancestor	ep_star	2025-04-01	0.143
epitope ancestor	ep_star	2025-10-01	0.179
epitope ancestor	ep_star	2026-04-01	0.229
epitope ancestor	ep_star	2026-10-01	0.203
epitope ancestor	ep_star	2027-04-01	0.233
epitope ancestor	ep_star	2027-10-01	0.25
epitope ancestor	ep_star	2028-04-01	0.265
epitope ancestor	ep_star	2028-10-01	0.266
epitope ancestor	ep_star	2029-04-01	0.276
epitope ancestor	ep_star	2029-10-01	0.265
epitope ancestor	ep_star	2030-04-01	0.264
epitope ancestor	ep_star	2030-10-01	0.082
epitope ancestor	ep_star	2031-04-01	0.058
epitope ancestor	ep_star	2031-10-01	0.032
epitope ancestor	ep_star	2032-04-01	-0.01
epitope ancestor	ep_star	2032-10-01	0.026
epitope ancestor	ep_star	2033-04-01	0.042
epitope ancestor	ep_star	2033-10-01	0.077
epitope ancestor	ep_star	2034-04-01	0.089
epitope ancestor	ep_star	2034-10-01	0.108
epitope ancestor	ep_star	2035-04-01	0.088
epitope ancestor	ep_star	2035-10-01	0.081
epitope ancestor	ep_star	2036-04-01	0.1
epitope ancestor	ep_star	2036-10-01	0.056
epitope ancestor	ep_star	2037-04-01	0.018
epitope ancestor	ep_star	2037-10-01	0.004
epitope ancestor	ep_star	2038-04-01	0.022
epitope ancestor	ep_star	2038-10-01	0.073
epitope ancestor	ep_star	2039-04-01	0.073
epitope ancestor	ep_star	2039-10-01	0.076
epitope antigenic novelty	ep_x	2023-10-01	-0.0
epitope antigenic novelty	ep_x	2024-04-01	0.006
epitope antigenic novelty	ep_x	2024-10-01	-0.003
epitope antigenic novelty	ep_x	2025-04-01	-0.042
epitope antigenic novelty	ep_x	2025-10-01	-0.011
epitope antigenic novelty	ep_x	2026-04-01	0.036
epitope antigenic novelty	ep_x	2026-10-01	-0.004
epitope antigenic novelty	ep_x	2027-04-01	0.027
epitope antigenic novelty	ep_x	2027-10-01	0.034
epitope antigenic novelty	ep_x	2028-04-01	0.045
epitope antigenic novelty	ep_x	2028-10-01	0.048
epitope antigenic novelty	ep_x	2029-04-01	0.051
epitope antigenic novelty	ep_x	2029-10-01	0.026
epitope antigenic novelty	ep_x	2030-04-01	0.008
epitope antigenic novelty	ep_x	2030-10-01	0.049
epitope antigenic novelty	ep_x	2031-04-01	0.021
epitope antigenic novelty	ep_x	2031-10-01	-0.01
epitope antigenic novelty	ep_x	2032-04-01	-0.054
epitope antigenic novelty	ep_x	2032-10-01	-0.016
epitope antigenic novelty	ep_x	2033-04-01	-0.002
epitope antigenic novelty	ep_x	2033-10-01	0.041
epitope antigenic novelty	ep_x	2034-04-01	0.049
epitope antigenic novelty	ep_x	2034-10-01	0.083
epitope antigenic novelty	ep_x	2035-04-01	0.062
epitope antigenic novelty	ep_x	2035-10-01	0.063
epitope antigenic novelty	ep_x	2036-04-01	0.082
epitope antigenic novelty	ep_x	2036-10-01	0.038
epitope antigenic novelty	ep_x	2037-04-01	0.002
epitope antigenic novelty	ep_x	2037-10-01	-0.013
epitope antigenic novelty	ep_x	2038-04-01	0.005
epitope antigenic novelty	ep_x	2038-10-01	-0.291
epitope antigenic novelty	ep_x	2039-04-01	-0.641
epitope antigenic novelty	ep_x	2039-10-01	-0.8
mutational load	ne_star	2023-10-01	-1.84
mutational load	ne_star	2024-04-01	-1.594
mutational load	ne_star	2024-10-01	-1.518
mutational load	ne_star	2025-04-01	-1.558
mutational load	ne_star	2025-10-01	-1.508
mutational load	ne_star	2026-04-01	-1.502
mutational load	ne_star	2026-10-01	-1.45
mutational load	ne_star	2027-04-01	-1.44
mutational load	ne_star	2027-10-01	-1.626
mutational load	ne_star	2028-04-01	-1.698
mutational load	ne_star	2028-10-01	-1.508
mutational load	ne_star	2029-04-01	-1.416
mutational load	ne_star	2029-10-01	-1.404
mutational load	ne_star	2030-04-01	-1.421
mutational load	ne_star	2030-10-01	-1.534
mutational load	ne_star	2031-04-01	-1.443
mutational load	ne_star	2031-10-01	-1.534
mutational load	ne_star	2032-04-01	-1.466
mutational load	ne_star	2032-10-01	-1.359
mutational load	ne_star	2033-04-01	-1.386
mutational load	ne_star	2033-10-01	-1.364
mutational load	ne_star	2034-04-01	-1.325
mutational load	ne_star	2034-10-01	-1.416
mutational load	ne_star	2035-04-01	-1.475
mutational load	ne_star	2035-10-01	-1.483
mutational load	ne_star	2036-04-01	-1.535
mutational load	ne_star	2036-10-01	-1.483
mutational load	ne_star	2037-04-01	-1.487
mutational load	ne_star	2037-10-01	-1.539
mutational load	ne_star	2038-04-01	-1.311
mutational load	ne_star	2038-10-01	-1.261
mutational load	ne_star	2039-04-01	-1.614
mutational load	ne_star	2039-10-01	-1.609
LBI	lbi	2023-10-01	1.177
LBI	lbi	2024-04-01	1.231
LBI	lbi	2024-10-01	1.131
LBI	lbi	2025-04-01	1.202
LBI	lbi	2025-10-01	1.205
LBI	lbi	2026-04-01	1.209
LBI	lbi	2026-10-01	1.246
LBI	lbi	2027-04-01	1.256
LBI	lbi	2027-10-01	1.22
LBI	lbi	2028-04-01	1.351
LBI	lbi	2028-10-01	4.528
LBI	lbi	2029-04-01	4.499
LBI	lbi	2029-10-01	4.784
LBI	lbi	2030-04-01	4.808
LBI	lbi	2030-10-01	2.981
LBI	lbi	2031-04-01	2.963
LBI	lbi	2031-10-01	2.895
LBI	lbi	2032-04-01	2.626
LBI	lbi	2032-10-01	2.494
LBI	lbi	2033-04-01	2.312
LBI	lbi	2033-10-01	2.23
LBI	lbi	2034-04-01	2.366
LBI	lbi	2034-10-01	1.893
LBI	lbi	2035-04-01	1.963
LBI	lbi	2035-10-01	2.139
LBI	lbi	2036-04-01	2.183
LBI	lbi	2036-10-01	2.063
LBI	lbi	2037-04-01	2.032
LBI	lbi	2037-10-01	2.065
LBI	lbi	2038-04-01	2.122
LBI	lbi	2038-10-01	2.181
LBI	lbi	2039-04-01	2.121
LBI	lbi	2039-10-01	2.079
delta frequency	delta_frequency	2023-10-01	0.813
delta frequency	delta_frequency	2024-04-01	0.91
delta frequency	delta_frequency	2024-10-01	0.769
delta frequency	delta_frequency	2025-04-01	0.766
delta frequency	delta_frequency	2025-10-01	0.802
delta frequency	delta_frequency	2026-04-01	1.136
delta frequency	delta_frequency	2026-10-01	1.068
delta frequency	delta_frequency	2027-04-01	1.068
delta frequency	delta_frequency	2027-10-01	0.836
delta frequency	delta_frequency	2028-04-01	0.85
delta frequency	delta_frequency	2028-10-01	0.849
delta frequency	delta_frequency	2029-04-01	1.333
delta frequency	delta_frequency	2029-10-01	1.899
delta frequency	delta_frequency	2030-04-01	1.462
delta frequency	delta_frequency	2030-10-01	1.428
delta frequency	delta_frequency	2031-04-01	1.627
delta frequency	delta_frequency	2031-10-01	1.626
delta frequency	delta_frequency	2032-04-01	1.992
delta frequency	delta_frequency	2032-10-01	1.626
delta frequency	delta_frequency	2033-04-01	1.526
delta frequency	delta_frequency	2033-10-01	1.63
delta frequency	delta_frequency	2034-04-01	1.991
delta frequency	delta_frequency	2034-10-01	1.626
delta frequency	delta_frequency	2035-04-01	2.008
delta frequency	delta_frequency	2035-10-01	1.901
delta frequency	delta_frequency	2036-04-01	1.919
delta frequency	delta_frequency	2036-10-01	1.915
delta frequency	delta_frequency	2037-04-01	1.905
delta frequency	delta_frequency	2037-10-01	1.891
delta frequency	delta_frequency	2038-04-01	1.862
delta frequency	delta_frequency	2038-10-01	1.851
delta frequency	delta_frequency	2039-04-01	1.63
delta frequency	delta_frequency	2039-10-01	1.668
epitope ancestor + mutational load	ep_star	2023-10-01	0.402
epitope ancestor + mutational load	ne_star	2023-10-01	-1.883
epitope ancestor + mutational load	ep_star	2024-04-01	0.487
epitope ancestor + mutational load	ne_star	2024-04-01	-1.539
epitope ancestor + mutational load	ep_star	2024-10-01	0.389
epitope ancestor + mutational load	ne_star	2024-10-01	-1.809
epitope ancestor + mutational load	ep_star	2025-04-01	0.338
epitope ancestor + mutational load	ne_star	2025-04-01	-1.658
epitope ancestor + mutational load	ep_star	2025-10-01	0.338
epitope ancestor + mutational load	ne_star	2025-10-01	-1.583
epitope ancestor + mutational load	ep_star	2026-04-01	0.422
epitope ancestor + mutational load	ne_star	2026-04-01	-1.524
epitope ancestor + mutational load	ep_star	2026-10-01	0.445
epitope ancestor + mutational load	ne_star	2026-10-01	-1.49
epitope ancestor + mutational load	ep_star	2027-04-01	0.452
epitope ancestor + mutational load	ne_star	2027-04-01	-1.54
epitope ancestor + mutational load	ep_star	2027-10-01	0.402
epitope ancestor + mutational load	ne_star	2027-10-01	-1.666
epitope ancestor + mutational load	ep_star	2028-04-01	0.442
epitope ancestor + mutational load	ne_star	2028-04-01	-1.672
epitope ancestor + mutational load	ep_star	2028-10-01	0.487
epitope ancestor + mutational load	ne_star	2028-10-01	-1.732
epitope ancestor + mutational load	ep_star	2029-04-01	0.276
epitope ancestor + mutational load	ne_star	2029-04-01	-1.646
epitope ancestor + mutational load	ep_star	2029-10-01	0.319
epitope ancestor + mutational load	ne_star	2029-10-01	-1.382
epitope ancestor + mutational load	ep_star	2030-04-01	0.306
epitope ancestor + mutational load	ne_star	2030-04-01	-1.415
epitope ancestor + mutational load	ep_star	2030-10-01	0.275
epitope ancestor + mutational load	ne_star	2030-10-01	-1.463
epitope ancestor + mutational load	ep_star	2031-04-01	0.321
epitope ancestor + mutational load	ne_star	2031-04-01	-1.542
epitope ancestor + mutational load	ep_star	2031-10-01	0.371
epitope ancestor + mutational load	ne_star	2031-10-01	-1.696
epitope ancestor + mutational load	ep_star	2032-04-01	0.332
epitope ancestor + mutational load	ne_star	2032-04-01	-1.639
epitope ancestor + mutational load	ep_star	2032-10-01	0.333
epitope ancestor + mutational load	ne_star	2032-10-01	-1.409
epitope ancestor + mutational load	ep_star	2033-04-01	0.323
epitope ancestor + mutational load	ne_star	2033-04-01	-1.489
epitope ancestor + mutational load	ep_star	2033-10-01	0.329
epitope ancestor + mutational load	ne_star	2033-10-01	-1.561
epitope ancestor + mutational load	ep_star	2034-04-01	0.302
epitope ancestor + mutational load	ne_star	2034-04-01	-1.394
epitope ancestor + mutational load	ep_star	2034-10-01	0.266
epitope ancestor + mutational load	ne_star	2034-10-01	-1.459
epitope ancestor + mutational load	ep_star	2035-04-01	0.3
epitope ancestor + mutational load	ne_star	2035-04-01	-1.522
epitope ancestor + mutational load	ep_star	2035-10-01	0.357
epitope ancestor + mutational load	ne_star	2035-10-01	-1.435
epitope ancestor + mutational load	ep_star	2036-04-01	0.241
epitope ancestor + mutational load	ne_star	2036-04-01	-1.658
epitope ancestor + mutational load	ep_star	2036-10-01	0.253
epitope ancestor + mutational load	ne_star	2036-10-01	-1.46
epitope ancestor + mutational load	ep_star	2037-04-01	0.291
epitope ancestor + mutational load	ne_star	2037-04-01	-1.491
epitope ancestor + mutational load	ep_star	2037-10-01	0.305
epitope ancestor + mutational load	ne_star	2037-10-01	-1.495
epitope ancestor + mutational load	ep_star	2038-04-01	0.354
epitope ancestor + mutational load	ne_star	2038-04-01	-1.457
epitope ancestor + mutational load	ep_star	2038-10-01	0.377
epitope ancestor + mutational load	ne_star	2038-10-01	-1.458
epitope ancestor + mutational load	ep_star	2039-04-01	0.312
epitope ancestor + mutational load	ne_star	2039-04-01	-1.744
epitope ancestor + mutational load	ep_star	2039-10-01	0.357
epitope ancestor + mutational load	ne_star	2039-10-01	-1.848
epitope antigenic novelty + mutational load	ep_x	2023-10-01	-0.001
epitope antigenic novelty + mutational load	ne_star	2023-10-01	0.039
epitope antigenic novelty + mutational load	ep_x	2024-04-01	-0.009
epitope antigenic novelty + mutational load	ne_star	2024-04-01	-0.001
epitope antigenic novelty + mutational load	ep_x	2024-10-01	0.257
epitope antigenic novelty + mutational load	ne_star	2024-10-01	-1.686
epitope antigenic novelty + mutational load	ep_x	2025-04-01	0.229
epitope antigenic novelty + mutational load	ne_star	2025-04-01	-1.571
epitope antigenic novelty + mutational load	ep_x	2025-10-01	0.221
epitope antigenic novelty + mutational load	ne_star	2025-10-01	-1.605
epitope antigenic novelty + mutational load	ep_x	2026-04-01	0.222
epitope antigenic novelty + mutational load	ne_star	2026-04-01	-1.628
epitope antigenic novelty + mutational load	ep_x	2026-10-01	0.207
epitope antigenic novelty + mutational load	ne_star	2026-10-01	-1.577
epitope antigenic novelty + mutational load	ep_x	2027-04-01	0.2
epitope antigenic novelty + mutational load	ne_star	2027-04-01	-1.326
epitope antigenic novelty + mutational load	ep_x	2027-10-01	-0.049
epitope antigenic novelty + mutational load	ne_star	2027-10-01	-1.737
epitope antigenic novelty + mutational load	ep_x	2028-04-01	-0.013
epitope antigenic novelty + mutational load	ne_star	2028-04-01	-1.464
epitope antigenic novelty + mutational load	ep_x	2028-10-01	0.023
epitope antigenic novelty + mutational load	ne_star	2028-10-01	-1.588
epitope antigenic novelty + mutational load	ep_x	2029-04-01	0.065
epitope antigenic novelty + mutational load	ne_star	2029-04-01	-1.519
epitope antigenic novelty + mutational load	ep_x	2029-10-01	0.061
epitope antigenic novelty + mutational load	ne_star	2029-10-01	-1.348
epitope antigenic novelty + mutational load	ep_x	2030-04-01	0.015
epitope antigenic novelty + mutational load	ne_star	2030-04-01	-1.383
epitope antigenic novelty + mutational load	ep_x	2030-10-01	0.0
epitope antigenic novelty + mutational load	ne_star	2030-10-01	-1.505
epitope antigenic novelty + mutational load	ep_x	2031-04-01	0.053
epitope antigenic novelty + mutational load	ne_star	2031-04-01	-1.452
epitope antigenic novelty + mutational load	ep_x	2031-10-01	0.055
epitope antigenic novelty + mutational load	ne_star	2031-10-01	-1.528
epitope antigenic novelty + mutational load	ep_x	2032-04-01	0.021
epitope antigenic novelty + mutational load	ne_star	2032-04-01	-1.44
epitope antigenic novelty + mutational load	ep_x	2032-10-01	-0.006
epitope antigenic novelty + mutational load	ne_star	2032-10-01	-1.303
epitope antigenic novelty + mutational load	ep_x	2033-04-01	0.013
epitope antigenic novelty + mutational load	ne_star	2033-04-01	-1.356
epitope antigenic novelty + mutational load	ep_x	2033-10-01	0.046
epitope antigenic novelty + mutational load	ne_star	2033-10-01	-1.339
epitope antigenic novelty + mutational load	ep_x	2034-04-01	0.011
epitope antigenic novelty + mutational load	ne_star	2034-04-01	-1.279
epitope antigenic novelty + mutational load	ep_x	2034-10-01	-0.015
epitope antigenic novelty + mutational load	ne_star	2034-10-01	-1.329
epitope antigenic novelty + mutational load	ep_x	2035-04-01	0.03
epitope antigenic novelty + mutational load	ne_star	2035-04-01	-1.37
epitope antigenic novelty + mutational load	ep_x	2035-10-01	0.005
epitope antigenic novelty + mutational load	ne_star	2035-10-01	-1.37
epitope antigenic novelty + mutational load	ep_x	2036-04-01	0.025
epitope antigenic novelty + mutational load	ne_star	2036-04-01	-1.496
epitope antigenic novelty + mutational load	ep_x	2036-10-01	0.067
epitope antigenic novelty + mutational load	ne_star	2036-10-01	-1.495
epitope antigenic novelty + mutational load	ep_x	2037-04-01	0.095
epitope antigenic novelty + mutational load	ne_star	2037-04-01	-1.554
epitope antigenic novelty + mutational load	ep_x	2037-10-01	-0.038
epitope antigenic novelty + mutational load	ne_star	2037-10-01	-1.336
epitope antigenic novelty + mutational load	ep_x	2038-04-01	-0.001
epitope antigenic novelty + mutational load	ne_star	2038-04-01	-1.296
epitope antigenic novelty + mutational load	ep_x	2038-10-01	-0.035
epitope antigenic novelty + mutational load	ne_star	2038-10-01	-1.335
epitope antigenic novelty + mutational load	ep_x	2039-04-01	-0.001
epitope antigenic novelty + mutational load	ne_star	2039-04-01	-1.621
epitope antigenic novelty + mutational load	ep_x	2039-10-01	-0.886
epitope antigenic novelty + mutational load	ne_star	2039-10-01	-1.798
LBI + mutational load	lbi	2023-10-01	1.011
LBI + mutational load	ne_star	2023-10-01	-2.028
LBI + mutational load	lbi	2024-04-01	1.107
LBI + mutational load	ne_star	2024-04-01	-2.182
LBI + mutational load	lbi	2024-10-01	1.073
LBI + mutational load	ne_star	2024-10-01	-2.228
LBI + mutational load	lbi	2025-04-01	1.085
LBI + mutational load	ne_star	2025-04-01	-2.205
LBI + mutational load	lbi	2025-10-01	1.095
LBI + mutational load	ne_star	2025-10-01	-2.289
LBI + mutational load	lbi	2026-04-01	1.078
LBI + mutational load	ne_star	2026-04-01	-2.006
LBI + mutational load	lbi	2026-10-01	1.066
LBI + mutational load	ne_star	2026-10-01	-1.911
LBI + mutational load	lbi	2027-04-01	1.066
LBI + mutational load	ne_star	2027-04-01	-1.41
LBI + mutational load	lbi	2027-10-01	0.975
LBI + mutational load	ne_star	2027-10-01	-2.14
LBI + mutational load	lbi	2028-04-01	1.012
LBI + mutational load	ne_star	2028-04-01	-2.174
LBI + mutational load	lbi	2028-10-01	1.056
LBI + mutational load	ne_star	2028-10-01	-2.349
LBI + mutational load	lbi	2029-04-01	1.077
LBI + mutational load	ne_star	2029-04-01	-2.049
LBI + mutational load	lbi	2029-10-01	1.12
LBI + mutational load	ne_star	2029-10-01	-2.015
LBI + mutational load	lbi	2030-04-01	1.045
LBI + mutational load	ne_star	2030-04-01	-2.017
LBI + mutational load	lbi	2030-10-01	1.031
LBI + mutational load	ne_star	2030-10-01	-2.099
LBI + mutational load	lbi	2031-04-01	1.059
LBI + mutational load	ne_star	2031-04-01	-2.127
LBI + mutational load	lbi	2031-10-01	1.026
LBI + mutational load	ne_star	2031-10-01	-2.145
LBI + mutational load	lbi	2032-04-01	1.051
LBI + mutational load	ne_star	2032-04-01	-2.109
LBI + mutational load	lbi	2032-10-01	1.152
LBI + mutational load	ne_star	2032-10-01	-2.006
LBI + mutational load	lbi	2033-04-01	1.168
LBI + mutational load	ne_star	2033-04-01	-2.03
LBI + mutational load	lbi	2033-10-01	1.159
LBI + mutational load	ne_star	2033-10-01	-2.022
LBI + mutational load	lbi	2034-04-01	1.702
LBI + mutational load	ne_star	2034-04-01	-0.893
LBI + mutational load	lbi	2034-10-01	1.622
LBI + mutational load	ne_star	2034-10-01	-0.903
LBI + mutational load	lbi	2035-04-01	1.671
LBI + mutational load	ne_star	2035-04-01	-0.705
LBI + mutational load	lbi	2035-10-01	1.661
LBI + mutational load	ne_star	2035-10-01	-0.732
LBI + mutational load	lbi	2036-04-01	1.705
LBI + mutational load	ne_star	2036-04-01	-0.803
LBI + mutational load	lbi	2036-10-01	1.865
LBI + mutational load	ne_star	2036-10-01	-1.56
LBI + mutational load	lbi	2037-04-01	1.852
LBI + mutational load	ne_star	2037-04-01	-1.548
LBI + mutational load	lbi	2037-10-01	1.826
LBI + mutational load	ne_star	2037-10-01	-1.533
LBI + mutational load	lbi	2038-04-01	1.773
LBI + mutational load	ne_star	2038-04-01	-1.537
LBI + mutational load	lbi	2038-10-01	1.777
LBI + mutational load	ne_star	2038-10-01	-1.495
LBI + mutational load	lbi	2039-04-01	1.731
LBI + mutational load	ne_star	2039-04-01	-1.511
LBI + mutational load	lbi	2039-10-01	1.69
LBI + mutational load	ne_star	2039-10-01	-1.495
