# Supplementary material for: Integrating genotypes and phenotypes improves long-term forecasts of seasonal influenza A/H3N2 evolution
Source: eLife. 2020 Sep 2;9:e60067. doi: 10.7554/eLife.60067 (PMC7553778; doi:10.7554/eLife.60067)
Supplement: Table 4—source data 2. [file elife-60067-table4-data2.csv]

error_type	model	timepoint	model_distance_to_future	naive_distance_to_future	optimal_distance_to_future
validation	true fitness	2023-10-01	7.434	8.871	4.645
validation	true fitness	2024-04-01	6.44	8.352	4.68
validation	true fitness	2024-10-01	8.454	10.028	5.221
validation	true fitness	2025-04-01	10.688	11.031	5.352
validation	true fitness	2025-10-01	5.812	8.814	5.164
validation	true fitness	2026-04-01	7.759	8.981	5.714
validation	true fitness	2026-10-01	7.925	10.138	3.936
validation	true fitness	2027-04-01	6.671	11.224	4.32
validation	true fitness	2027-10-01	7.434	9.799	5.264
validation	true fitness	2028-04-01	6.588	10.142	4.759
validation	true fitness	2028-10-01	5.869	8.827	4.665
validation	true fitness	2029-04-01	6.933	9.139	4.08
validation	true fitness	2029-10-01	5.694	8.676	4.458
validation	true fitness	2030-04-01	6.555	8.897	5.034
validation	true fitness	2030-10-01	8.663	11.214	5.563
validation	true fitness	2031-04-01	8.465	11.275	5.817
validation	true fitness	2031-10-01	5.215	8.112	4.156
validation	true fitness	2032-04-01	6.177	7.567	3.729
validation	true fitness	2032-10-01	8.505	9.075	4.592
validation	true fitness	2033-04-01	5.248	8.043	4.257
validation	true fitness	2033-10-01	6.896	9.799	4.499
validation	true fitness	2034-04-01	4.689	10.013	4.251
validation	true fitness	2034-10-01	5.418	8.239	4.487
validation	true fitness	2035-04-01	6.454	8.097	4.763
validation	true fitness	2035-10-01	4.495	7.909	3.325
validation	true fitness	2036-04-01	6.137	8.868	4.188
validation	true fitness	2036-10-01	7.929	8.722	4.503
validation	true fitness	2037-04-01	5.339	6.382	4.228
validation	true fitness	2037-10-01	5.918	7.458	4.831
validation	true fitness	2038-04-01	4.157	5.239	3.105
validation	true fitness	2038-10-01	6.604	8.122	4.593
validation	true fitness	2039-04-01	9.579	10.507	4.379
validation	true fitness	2039-10-01	8.821	8.601	4.336
validation	epitope ancestor	2023-10-01	9.173	8.871	4.645
validation	epitope ancestor	2024-04-01	8.47	8.352	4.68
validation	epitope ancestor	2024-10-01	9.959	10.028	5.221
validation	epitope ancestor	2025-04-01	10.84	11.031	5.352
validation	epitope ancestor	2025-10-01	8.632	8.814	5.164
validation	epitope ancestor	2026-04-01	9.084	8.981	5.714
validation	epitope ancestor	2026-10-01	10.058	10.138	3.936
validation	epitope ancestor	2027-04-01	11.171	11.224	4.32
validation	epitope ancestor	2027-10-01	9.841	9.799	5.264
validation	epitope ancestor	2028-04-01	10.263	10.142	4.759
validation	epitope ancestor	2028-10-01	8.523	8.827	4.665
validation	epitope ancestor	2029-04-01	9.233	9.139	4.08
validation	epitope ancestor	2029-10-01	8.949	8.676	4.458
validation	epitope ancestor	2030-04-01	8.78	8.897	5.034
validation	epitope ancestor	2030-10-01	11.158	11.214	5.563
validation	epitope ancestor	2031-04-01	11.348	11.275	5.817
validation	epitope ancestor	2031-10-01	8.092	8.112	4.156
validation	epitope ancestor	2032-04-01	7.557	7.567	3.729
validation	epitope ancestor	2032-10-01	9.081	9.075	4.592
validation	epitope ancestor	2033-04-01	7.989	8.043	4.257
validation	epitope ancestor	2033-10-01	9.812	9.799	4.499
validation	epitope ancestor	2034-04-01	9.969	10.013	4.251
validation	epitope ancestor	2034-10-01	8.142	8.239	4.487
validation	epitope ancestor	2035-04-01	8.103	8.097	4.763
validation	epitope ancestor	2035-10-01	7.9	7.909	3.325
validation	epitope ancestor	2036-04-01	8.776	8.868	4.188
validation	epitope ancestor	2036-10-01	8.7	8.722	4.503
validation	epitope ancestor	2037-04-01	6.372	6.382	4.228
validation	epitope ancestor	2037-10-01	7.453	7.458	4.831
validation	epitope ancestor	2038-04-01	5.237	5.239	3.105
validation	epitope ancestor	2038-10-01	8.135	8.122	4.593
validation	epitope ancestor	2039-04-01	10.51	10.507	4.379
validation	epitope ancestor	2039-10-01	8.447	8.601	4.336
validation	epitope antigenic novelty	2023-10-01	8.871	8.871	4.645
validation	epitope antigenic novelty	2024-04-01	8.347	8.352	4.68
validation	epitope antigenic novelty	2024-10-01	10.031	10.028	5.221
validation	epitope antigenic novelty	2025-04-01	11.022	11.031	5.352
validation	epitope antigenic novelty	2025-10-01	8.837	8.814	5.164
validation	epitope antigenic novelty	2026-04-01	8.967	8.981	5.714
validation	epitope antigenic novelty	2026-10-01	10.147	10.138	3.936
validation	epitope antigenic novelty	2027-04-01	11.214	11.224	4.32
validation	epitope antigenic novelty	2027-10-01	9.769	9.799	5.264
validation	epitope antigenic novelty	2028-04-01	10.145	10.142	4.759
validation	epitope antigenic novelty	2028-10-01	8.751	8.827	4.665
validation	epitope antigenic novelty	2029-04-01	9.152	9.139	4.08
validation	epitope antigenic novelty	2029-10-01	8.661	8.676	4.458
validation	epitope antigenic novelty	2030-04-01	8.908	8.897	5.034
validation	epitope antigenic novelty	2030-10-01	11.305	11.214	5.563
validation	epitope antigenic novelty	2031-04-01	11.24	11.275	5.817
validation	epitope antigenic novelty	2031-10-01	8.137	8.112	4.156
validation	epitope antigenic novelty	2032-04-01	7.6	7.567	3.729
validation	epitope antigenic novelty	2032-10-01	9.066	9.075	4.592
validation	epitope antigenic novelty	2033-04-01	8.033	8.043	4.257
validation	epitope antigenic novelty	2033-10-01	9.804	9.799	4.499
validation	epitope antigenic novelty	2034-04-01	10.01	10.013	4.251
validation	epitope antigenic novelty	2034-10-01	8.276	8.239	4.487
validation	epitope antigenic novelty	2035-04-01	8.131	8.097	4.763
validation	epitope antigenic novelty	2035-10-01	7.996	7.909	3.325
validation	epitope antigenic novelty	2036-04-01	8.959	8.868	4.188
validation	epitope antigenic novelty	2036-10-01	8.75	8.722	4.503
validation	epitope antigenic novelty	2037-04-01	6.387	6.382	4.228
validation	epitope antigenic novelty	2037-10-01	7.453	7.458	4.831
validation	epitope antigenic novelty	2038-04-01	5.24	5.239	3.105
validation	epitope antigenic novelty	2038-10-01	7.955	8.122	4.593
validation	epitope antigenic novelty	2039-04-01	10.499	10.507	4.379
validation	epitope antigenic novelty	2039-10-01	10.271	8.601	4.336
validation	mutational load	2023-10-01	7.496	8.871	4.645
validation	mutational load	2024-04-01	7.815	8.352	4.68
validation	mutational load	2024-10-01	8.763	10.028	5.221
validation	mutational load	2025-04-01	10.322	11.031	5.352
validation	mutational load	2025-10-01	7.983	8.814	5.164
validation	mutational load	2026-04-01	7.972	8.981	5.714
validation	mutational load	2026-10-01	8.379	10.138	3.936
validation	mutational load	2027-04-01	10.554	11.224	4.32
validation	mutational load	2027-10-01	8.911	9.799	5.264
validation	mutational load	2028-04-01	10.226	10.142	4.759
validation	mutational load	2028-10-01	8.764	8.827	4.665
validation	mutational load	2029-04-01	8.554	9.139	4.08
validation	mutational load	2029-10-01	7.358	8.676	4.458
validation	mutational load	2030-04-01	7.828	8.897	5.034
validation	mutational load	2030-10-01	10.264	11.214	5.563
validation	mutational load	2031-04-01	10.63	11.275	5.817
validation	mutational load	2031-10-01	8.889	8.112	4.156
validation	mutational load	2032-04-01	6.81	7.567	3.729
validation	mutational load	2032-10-01	7.954	9.075	4.592
validation	mutational load	2033-04-01	6.832	8.043	4.257
validation	mutational load	2033-10-01	9.073	9.799	4.499
validation	mutational load	2034-04-01	9.416	10.013	4.251
validation	mutational load	2034-10-01	8.064	8.239	4.487
validation	mutational load	2035-04-01	7.216	8.097	4.763
validation	mutational load	2035-10-01	7.971	7.909	3.325
validation	mutational load	2036-04-01	7.653	8.868	4.188
validation	mutational load	2036-10-01	7.604	8.722	4.503
validation	mutational load	2037-04-01	6.221	6.382	4.228
validation	mutational load	2037-10-01	6.508	7.458	4.831
validation	mutational load	2038-04-01	4.771	5.239	3.105
validation	mutational load	2038-10-01	7.078	8.122	4.593
validation	mutational load	2039-04-01	9.532	10.507	4.379
validation	mutational load	2039-10-01	9.43	8.601	4.336
validation	LBI	2023-10-01	9.488	8.871	4.645
validation	LBI	2024-04-01	7.254	8.352	4.68
validation	LBI	2024-10-01	8.793	10.028	5.221
validation	LBI	2025-04-01	9.825	11.031	5.352
validation	LBI	2025-10-01	7.963	8.814	5.164
validation	LBI	2026-04-01	8.55	8.981	5.714
validation	LBI	2026-10-01	12.215	10.138	3.936
validation	LBI	2027-04-01	11.927	11.224	4.32
validation	LBI	2027-10-01	8.278	9.799	5.264
validation	LBI	2028-04-01	7.546	10.142	4.759
validation	LBI	2028-10-01	6.782	8.827	4.665
validation	LBI	2029-04-01	7.82	9.139	4.08
validation	LBI	2029-10-01	7.356	8.676	4.458
validation	LBI	2030-04-01	6.613	8.897	5.034
validation	LBI	2030-10-01	9.999	11.214	5.563
validation	LBI	2031-04-01	8.321	11.275	5.817
validation	LBI	2031-10-01	5.375	8.112	4.156
validation	LBI	2032-04-01	6.727	7.567	3.729
validation	LBI	2032-10-01	8.622	9.075	4.592
validation	LBI	2033-04-01	5.521	8.043	4.257
validation	LBI	2033-10-01	7.24	9.799	4.499
validation	LBI	2034-04-01	6.39	10.013	4.251
validation	LBI	2034-10-01	5.87	8.239	4.487
validation	LBI	2035-04-01	8.347	8.097	4.763
validation	LBI	2035-10-01	7.239	7.909	3.325
validation	LBI	2036-04-01	4.635	8.868	4.188
validation	LBI	2036-10-01	7.206	8.722	4.503
validation	LBI	2037-04-01	5.163	6.382	4.228
validation	LBI	2037-10-01	6.149	7.458	4.831
validation	LBI	2038-04-01	4.627	5.239	3.105
validation	LBI	2038-10-01	7.408	8.122	4.593
validation	LBI	2039-04-01	9.194	10.507	4.379
validation	LBI	2039-10-01	5.351	8.601	4.336
validation	delta frequency	2023-10-01	9.056	8.871	4.645
validation	delta frequency	2024-04-01	8.169	8.352	4.68
validation	delta frequency	2024-10-01	9.454	10.028	5.221
validation	delta frequency	2025-04-01	9.991	11.031	5.352
validation	delta frequency	2025-10-01	8.081	8.814	5.164
validation	delta frequency	2026-04-01	9.461	8.981	5.714
validation	delta frequency	2026-10-01	11.465	10.138	3.936
validation	delta frequency	2027-04-01	9.282	11.224	4.32
validation	delta frequency	2027-10-01	9.157	9.799	5.264
validation	delta frequency	2028-04-01	9.411	10.142	4.759
validation	delta frequency	2028-10-01	7.317	8.827	4.665
validation	delta frequency	2029-04-01	7.652	9.139	4.08
validation	delta frequency	2029-10-01	6.369	8.676	4.458
validation	delta frequency	2030-04-01	7.83	8.897	5.034
validation	delta frequency	2030-10-01	9.86	11.214	5.563
validation	delta frequency	2031-04-01	9.53	11.275	5.817
validation	delta frequency	2031-10-01	6.503	8.112	4.156
validation	delta frequency	2032-04-01	8.069	7.567	3.729
validation	delta frequency	2032-10-01	9.087	9.075	4.592
validation	delta frequency	2033-04-01	6.654	8.043	4.257
validation	delta frequency	2033-10-01	9.48	9.799	4.499
validation	delta frequency	2034-04-01	8.692	10.013	4.251
validation	delta frequency	2034-10-01	6.895	8.239	4.487
validation	delta frequency	2035-04-01	7.244	8.097	4.763
validation	delta frequency	2035-10-01	5.753	7.909	3.325
validation	delta frequency	2036-04-01	7.584	8.868	4.188
validation	delta frequency	2036-10-01	7.243	8.722	4.503
validation	delta frequency	2037-04-01	6.153	6.382	4.228
validation	delta frequency	2037-10-01	7.428	7.458	4.831
validation	delta frequency	2038-04-01	5.487	5.239	3.105
validation	delta frequency	2038-10-01	8.574	8.122	4.593
validation	delta frequency	2039-04-01	9.349	10.507	4.379
validation	delta frequency	2039-10-01	5.977	8.601	4.336
validation	epitope ancestor + mutational load	2023-10-01	7.747	8.871	4.645
validation	epitope ancestor + mutational load	2024-04-01	8.085	8.352	4.68
validation	epitope ancestor + mutational load	2024-10-01	8.538	10.028	5.221
validation	epitope ancestor + mutational load	2025-04-01	9.971	11.031	5.352
validation	epitope ancestor + mutational load	2025-10-01	7.674	8.814	5.164
validation	epitope ancestor + mutational load	2026-04-01	8.13	8.981	5.714
validation	epitope ancestor + mutational load	2026-10-01	8.46	10.138	3.936
validation	epitope ancestor + mutational load	2027-04-01	10.396	11.224	4.32
validation	epitope ancestor + mutational load	2027-10-01	9.08	9.799	5.264
validation	epitope ancestor + mutational load	2028-04-01	10.557	10.142	4.759
validation	epitope ancestor + mutational load	2028-10-01	7.67	8.827	4.665
validation	epitope ancestor + mutational load	2029-04-01	8.544	9.139	4.08
validation	epitope ancestor + mutational load	2029-10-01	7.337	8.676	4.458
validation	epitope ancestor + mutational load	2030-04-01	7.676	8.897	5.034
validation	epitope ancestor + mutational load	2030-10-01	10.154	11.214	5.563
validation	epitope ancestor + mutational load	2031-04-01	11.173	11.275	5.817
validation	epitope ancestor + mutational load	2031-10-01	8.502	8.112	4.156
validation	epitope ancestor + mutational load	2032-04-01	6.724	7.567	3.729
validation	epitope ancestor + mutational load	2032-10-01	8.088	9.075	4.592
validation	epitope ancestor + mutational load	2033-04-01	6.579	8.043	4.257
validation	epitope ancestor + mutational load	2033-10-01	9.089	9.799	4.499
validation	epitope ancestor + mutational load	2034-04-01	9.334	10.013	4.251
validation	epitope ancestor + mutational load	2034-10-01	7.835	8.239	4.487
validation	epitope ancestor + mutational load	2035-04-01	7.242	8.097	4.763
validation	epitope ancestor + mutational load	2035-10-01	8.094	7.909	3.325
validation	epitope ancestor + mutational load	2036-04-01	7.306	8.868	4.188
validation	epitope ancestor + mutational load	2036-10-01	7.478	8.722	4.503
validation	epitope ancestor + mutational load	2037-04-01	5.915	6.382	4.228
validation	epitope ancestor + mutational load	2037-10-01	6.612	7.458	4.831
validation	epitope ancestor + mutational load	2038-04-01	4.754	5.239	3.105
validation	epitope ancestor + mutational load	2038-10-01	7.09	8.122	4.593
validation	epitope ancestor + mutational load	2039-04-01	9.496	10.507	4.379
validation	epitope ancestor + mutational load	2039-10-01	9.217	8.601	4.336
validation	epitope antigenic novelty + mutational load	2023-10-01	8.923	8.871	4.645
validation	epitope antigenic novelty + mutational load	2024-04-01	8.342	8.352	4.68
validation	epitope antigenic novelty + mutational load	2024-10-01	8.621	10.028	5.221
validation	epitope antigenic novelty + mutational load	2025-04-01	10.401	11.031	5.352
validation	epitope antigenic novelty + mutational load	2025-10-01	7.791	8.814	5.164
validation	epitope antigenic novelty + mutational load	2026-04-01	7.926	8.981	5.714
validation	epitope antigenic novelty + mutational load	2026-10-01	8.282	10.138	3.936
validation	epitope antigenic novelty + mutational load	2027-04-01	10.445	11.224	4.32
validation	epitope antigenic novelty + mutational load	2027-10-01	8.947	9.799	5.264
validation	epitope antigenic novelty + mutational load	2028-04-01	10.183	10.142	4.759
validation	epitope antigenic novelty + mutational load	2028-10-01	8.758	8.827	4.665
validation	epitope antigenic novelty + mutational load	2029-04-01	8.566	9.139	4.08
validation	epitope antigenic novelty + mutational load	2029-10-01	7.33	8.676	4.458
validation	epitope antigenic novelty + mutational load	2030-04-01	7.831	8.897	5.034
validation	epitope antigenic novelty + mutational load	2030-10-01	10.27	11.214	5.563
validation	epitope antigenic novelty + mutational load	2031-04-01	10.581	11.275	5.817
validation	epitope antigenic novelty + mutational load	2031-10-01	8.669	8.112	4.156
validation	epitope antigenic novelty + mutational load	2032-04-01	6.804	7.567	3.729
validation	epitope antigenic novelty + mutational load	2032-10-01	7.974	9.075	4.592
validation	epitope antigenic novelty + mutational load	2033-04-01	6.85	8.043	4.257
validation	epitope antigenic novelty + mutational load	2033-10-01	9.108	9.799	4.499
validation	epitope antigenic novelty + mutational load	2034-04-01	9.422	10.013	4.251
validation	epitope antigenic novelty + mutational load	2034-10-01	8.041	8.239	4.487
validation	epitope antigenic novelty + mutational load	2035-04-01	7.253	8.097	4.763
validation	epitope antigenic novelty + mutational load	2035-10-01	7.956	7.909	3.325
validation	epitope antigenic novelty + mutational load	2036-04-01	7.711	8.868	4.188
validation	epitope antigenic novelty + mutational load	2036-10-01	7.639	8.722	4.503
validation	epitope antigenic novelty + mutational load	2037-04-01	6.332	6.382	4.228
validation	epitope antigenic novelty + mutational load	2037-10-01	6.547	7.458	4.831
validation	epitope antigenic novelty + mutational load	2038-04-01	4.77	5.239	3.105
validation	epitope antigenic novelty + mutational load	2038-10-01	7.028	8.122	4.593
validation	epitope antigenic novelty + mutational load	2039-04-01	9.53	10.507	4.379
validation	epitope antigenic novelty + mutational load	2039-10-01	9.98	8.601	4.336
validation	LBI + mutational load	2023-10-01	8.355	8.871	4.645
validation	LBI + mutational load	2024-04-01	7.086	8.352	4.68
validation	LBI + mutational load	2024-10-01	7.876	10.028	5.221
validation	LBI + mutational load	2025-04-01	9.772	11.031	5.352
validation	LBI + mutational load	2025-10-01	7.643	8.814	5.164
validation	LBI + mutational load	2026-04-01	7.796	8.981	5.714
validation	LBI + mutational load	2026-10-01	9.366	10.138	3.936
validation	LBI + mutational load	2027-04-01	11.122	11.224	4.32
validation	LBI + mutational load	2027-10-01	7.787	9.799	5.264
validation	LBI + mutational load	2028-04-01	9.535	10.142	4.759
validation	LBI + mutational load	2028-10-01	5.904	8.827	4.665
validation	LBI + mutational load	2029-04-01	7.844	9.139	4.08
validation	LBI + mutational load	2029-10-01	5.583	8.676	4.458
validation	LBI + mutational load	2030-04-01	6.331	8.897	5.034
validation	LBI + mutational load	2030-10-01	9.759	11.214	5.563
validation	LBI + mutational load	2031-04-01	8.76	11.275	5.817
validation	LBI + mutational load	2031-10-01	6.562	8.112	4.156
validation	LBI + mutational load	2032-04-01	6.301	7.567	3.729
validation	LBI + mutational load	2032-10-01	8.331	9.075	4.592
validation	LBI + mutational load	2033-04-01	5.352	8.043	4.257
validation	LBI + mutational load	2033-10-01	7.529	9.799	4.499
validation	LBI + mutational load	2034-04-01	6.568	10.013	4.251
validation	LBI + mutational load	2034-10-01	5.676	8.239	4.487
validation	LBI + mutational load	2035-04-01	8.26	8.097	4.763
validation	LBI + mutational load	2035-10-01	5.321	7.909	3.325
validation	LBI + mutational load	2036-04-01	4.634	8.868	4.188
validation	LBI + mutational load	2036-10-01	6.815	8.722	4.503
validation	LBI + mutational load	2037-04-01	5.024	6.382	4.228
validation	LBI + mutational load	2037-10-01	6.165	7.458	4.831
validation	LBI + mutational load	2038-04-01	4.503	5.239	3.105
validation	LBI + mutational load	2038-10-01	7.001	8.122	4.593
validation	LBI + mutational load	2039-04-01	8.895	10.507	4.379
validation	LBI + mutational load	2039-10-01	5.391	8.601	4.336
test	true fitness	2040-04-01	5.78	7.282	4.294
test	true fitness	2040-10-01	6.606	8.078	4.884
test	true fitness	2041-04-01	6.181	8.491	4.254
test	true fitness	2041-10-01	6.982	9.027	4.241
test	true fitness	2042-04-01	5.743	7.665	4.113
test	true fitness	2042-10-01	8.377	9.783	6.169
test	true fitness	2043-04-01	9.978	12.679	5.028
test	true fitness	2043-10-01	7.256	11.095	6.264
test	true fitness	2044-04-01	8.191	9.352	5.453
test	true fitness	2044-10-01	5.121	7.494	4.358
test	true fitness	2045-04-01	5.92	7.671	3.968
test	true fitness	2045-10-01	5.836	8.215	4.16
test	true fitness	2046-04-01	5.22	7.46	3.723
test	true fitness	2046-10-01	8.664	8.132	4.369
test	true fitness	2047-04-01	9.808	10.777	5.435
test	true fitness	2047-10-01	10.028	11.732	6.36
test	true fitness	2048-04-01	11.133	10.93	5.273
test	true fitness	2048-10-01	5.951	7.423	4.922
test	epitope ancestor	2040-04-01	7.29	7.282	4.294
test	epitope ancestor	2040-10-01	8.092	8.078	4.884
test	epitope ancestor	2041-04-01	8.51	8.491	4.254
test	epitope ancestor	2041-10-01	8.96	9.027	4.241
test	epitope ancestor	2042-04-01	7.672	7.665	4.113
test	epitope ancestor	2042-10-01	9.767	9.783	6.169
test	epitope ancestor	2043-04-01	12.648	12.679	5.028
test	epitope ancestor	2043-10-01	10.868	11.095	6.264
test	epitope ancestor	2044-04-01	9.217	9.352	5.453
test	epitope ancestor	2044-10-01	7.368	7.494	4.358
test	epitope ancestor	2045-04-01	7.614	7.671	3.968
test	epitope ancestor	2045-10-01	8.201	8.215	4.16
test	epitope ancestor	2046-04-01	7.441	7.46	3.723
test	epitope ancestor	2046-10-01	8.128	8.132	4.369
test	epitope ancestor	2047-04-01	10.813	10.777	5.435
test	epitope ancestor	2047-10-01	11.637	11.732	6.36
test	epitope ancestor	2048-04-01	10.896	10.93	5.273
test	epitope ancestor	2048-10-01	7.361	7.423	4.922
test	epitope antigenic novelty	2040-04-01	7.264	7.282	4.294
test	epitope antigenic novelty	2040-10-01	8.051	8.078	4.884
test	epitope antigenic novelty	2041-04-01	8.465	8.491	4.254
test	epitope antigenic novelty	2041-10-01	8.974	9.027	4.241
test	epitope antigenic novelty	2042-04-01	7.652	7.665	4.113
test	epitope antigenic novelty	2042-10-01	9.793	9.783	6.169
test	epitope antigenic novelty	2043-04-01	12.615	12.679	5.028
test	epitope antigenic novelty	2043-10-01	11.107	11.095	6.264
test	epitope antigenic novelty	2044-04-01	9.39	9.352	5.453
test	epitope antigenic novelty	2044-10-01	7.55	7.494	4.358
test	epitope antigenic novelty	2045-04-01	7.701	7.671	3.968
test	epitope antigenic novelty	2045-10-01	8.233	8.215	4.16
test	epitope antigenic novelty	2046-04-01	7.484	7.46	3.723
test	epitope antigenic novelty	2046-10-01	8.134	8.132	4.369
test	epitope antigenic novelty	2047-04-01	10.743	10.777	5.435
test	epitope antigenic novelty	2047-10-01	11.736	11.732	6.36
test	epitope antigenic novelty	2048-04-01	10.941	10.93	5.273
test	epitope antigenic novelty	2048-10-01	7.436	7.423	4.922
test	mutational load	2040-04-01	6.328	7.282	4.294
test	mutational load	2040-10-01	7.667	8.078	4.884
test	mutational load	2041-04-01	8.333	8.491	4.254
test	mutational load	2041-10-01	8.806	9.027	4.241
test	mutational load	2042-04-01	6.403	7.665	4.113
test	mutational load	2042-10-01	8.658	9.783	6.169
test	mutational load	2043-04-01	11.078	12.679	5.028
test	mutational load	2043-10-01	8.892	11.095	6.264
test	mutational load	2044-04-01	8.507	9.352	5.453
test	mutational load	2044-10-01	7.805	7.494	4.358
test	mutational load	2045-04-01	6.845	7.671	3.968
test	mutational load	2045-10-01	7.435	8.215	4.16
test	mutational load	2046-04-01	6.432	7.46	3.723
test	mutational load	2046-10-01	6.801	8.132	4.369
test	mutational load	2047-04-01	9.85	10.777	5.435
test	mutational load	2047-10-01	10.575	11.732	6.36
test	mutational load	2048-04-01	10.238	10.93	5.273
test	mutational load	2048-10-01	6.966	7.423	4.922
test	LBI	2040-04-01	6.855	7.282	4.294
test	LBI	2040-10-01	6.635	8.078	4.884
test	LBI	2041-04-01	6.777	8.491	4.254
test	LBI	2041-10-01	6.734	9.027	4.241
test	LBI	2042-04-01	7.284	7.665	4.113
test	LBI	2042-10-01	8.726	9.783	6.169
test	LBI	2043-04-01	9.167	12.679	5.028
test	LBI	2043-10-01	6.632	11.095	6.264
test	LBI	2044-04-01	6.364	9.352	5.453
test	LBI	2044-10-01	6.254	7.494	4.358
test	LBI	2045-04-01	6.983	7.671	3.968
test	LBI	2045-10-01	7.057	8.215	4.16
test	LBI	2046-04-01	7.08	7.46	3.723
test	LBI	2046-10-01	9.769	8.132	4.369
test	LBI	2047-04-01	9.392	10.777	5.435
test	LBI	2047-10-01	7.708	11.732	6.36
test	LBI	2048-04-01	9.373	10.93	5.273
test	LBI	2048-10-01	6.383	7.423	4.922
test	delta frequency	2040-04-01	7.364	7.282	4.294
test	delta frequency	2040-10-01	7.834	8.078	4.884
test	delta frequency	2041-04-01	7.478	8.491	4.254
test	delta frequency	2041-10-01	8.122	9.027	4.241
test	delta frequency	2042-04-01	7.268	7.665	4.113
test	delta frequency	2042-10-01	9.439	9.783	6.169
test	delta frequency	2043-04-01	14.988	12.679	5.028
test	delta frequency	2043-10-01	8.324	11.095	6.264
test	delta frequency	2044-04-01	7.544	9.352	5.453
test	delta frequency	2044-10-01	6.387	7.494	4.358
test	delta frequency	2045-04-01	7.431	7.671	3.968
test	delta frequency	2045-10-01	8.54	8.215	4.16
test	delta frequency	2046-04-01	7.92	7.46	3.723
test	delta frequency	2046-10-01	8.387	8.132	4.369
test	delta frequency	2047-04-01	10.506	10.777	5.435
test	delta frequency	2047-10-01	10.443	11.732	6.36
test	delta frequency	2048-04-01	10.505	10.93	5.273
test	delta frequency	2048-10-01	7.193	7.423	4.922
test	epitope ancestor + mutational load	2040-04-01	6.387	7.282	4.294
test	epitope ancestor + mutational load	2040-10-01	8.048	8.078	4.884
test	epitope ancestor + mutational load	2041-04-01	8.65	8.491	4.254
test	epitope ancestor + mutational load	2041-10-01	8.993	9.027	4.241
test	epitope ancestor + mutational load	2042-04-01	6.314	7.665	4.113
test	epitope ancestor + mutational load	2042-10-01	8.936	9.783	6.169
test	epitope ancestor + mutational load	2043-04-01	10.784	12.679	5.028
test	epitope ancestor + mutational load	2043-10-01	8.49	11.095	6.264
test	epitope ancestor + mutational load	2044-04-01	8.274	9.352	5.453
test	epitope ancestor + mutational load	2044-10-01	7.272	7.494	4.358
test	epitope ancestor + mutational load	2045-04-01	6.7	7.671	3.968
test	epitope ancestor + mutational load	2045-10-01	7.478	8.215	4.16
test	epitope ancestor + mutational load	2046-04-01	6.377	7.46	3.723
test	epitope ancestor + mutational load	2046-10-01	6.756	8.132	4.369
test	epitope ancestor + mutational load	2047-04-01	9.946	10.777	5.435
test	epitope ancestor + mutational load	2047-10-01	10.614	11.732	6.36
test	epitope ancestor + mutational load	2048-04-01	10.239	10.93	5.273
test	epitope ancestor + mutational load	2048-10-01	6.73	7.423	4.922
test	epitope antigenic novelty + mutational load	2040-04-01	6.374	7.282	4.294
test	epitope antigenic novelty + mutational load	2040-10-01	7.675	8.078	4.884
test	epitope antigenic novelty + mutational load	2041-04-01	8.339	8.491	4.254
test	epitope antigenic novelty + mutational load	2041-10-01	8.817	9.027	4.241
test	epitope antigenic novelty + mutational load	2042-04-01	6.438	7.665	4.113
test	epitope antigenic novelty + mutational load	2042-10-01	8.71	9.783	6.169
test	epitope antigenic novelty + mutational load	2043-04-01	11.155	12.679	5.028
test	epitope antigenic novelty + mutational load	2043-10-01	8.964	11.095	6.264
test	epitope antigenic novelty + mutational load	2044-04-01	8.496	9.352	5.453
test	epitope antigenic novelty + mutational load	2044-10-01	7.652	7.494	4.358
test	epitope antigenic novelty + mutational load	2045-04-01	6.855	7.671	3.968
test	epitope antigenic novelty + mutational load	2045-10-01	7.427	8.215	4.16
test	epitope antigenic novelty + mutational load	2046-04-01	6.443	7.46	3.723
test	epitope antigenic novelty + mutational load	2046-10-01	6.862	8.132	4.369
test	epitope antigenic novelty + mutational load	2047-04-01	9.917	10.777	5.435
test	epitope antigenic novelty + mutational load	2047-10-01	10.618	11.732	6.36
test	epitope antigenic novelty + mutational load	2048-04-01	10.251	10.93	5.273
test	epitope antigenic novelty + mutational load	2048-10-01	6.961	7.423	4.922
test	LBI + mutational load	2040-04-01	6.199	7.282	4.294
test	LBI + mutational load	2040-10-01	6.155	8.078	4.884
test	LBI + mutational load	2041-04-01	6.723	8.491	4.254
test	LBI + mutational load	2041-10-01	5.598	9.027	4.241
test	LBI + mutational load	2042-04-01	6.038	7.665	4.113
test	LBI + mutational load	2042-10-01	8.36	9.783	6.169
test	LBI + mutational load	2043-04-01	9.235	12.679	5.028
test	LBI + mutational load	2043-10-01	6.614	11.095	6.264
test	LBI + mutational load	2044-04-01	6.519	9.352	5.453
test	LBI + mutational load	2044-10-01	5.786	7.494	4.358
test	LBI + mutational load	2045-04-01	6.811	7.671	3.968
test	LBI + mutational load	2045-10-01	7.131	8.215	4.16
test	LBI + mutational load	2046-04-01	7.052	7.46	3.723
test	LBI + mutational load	2046-10-01	7.101	8.132	4.369
test	LBI + mutational load	2047-04-01	9.078	10.777	5.435
test	LBI + mutational load	2047-10-01	8.008	11.732	6.36
test	LBI + mutational load	2048-04-01	9.244	10.93	5.273
test	LBI + mutational load	2048-10-01	6.077	7.423	4.922
