# Supplementary figures and images for: Integrating genotypes and phenotypes improves long-term forecasts of seasonal influenza A/H3N2 evolution
Source: eLife journal article supplement (doi:10.7554/elife.60067), 2020-09-02

**A**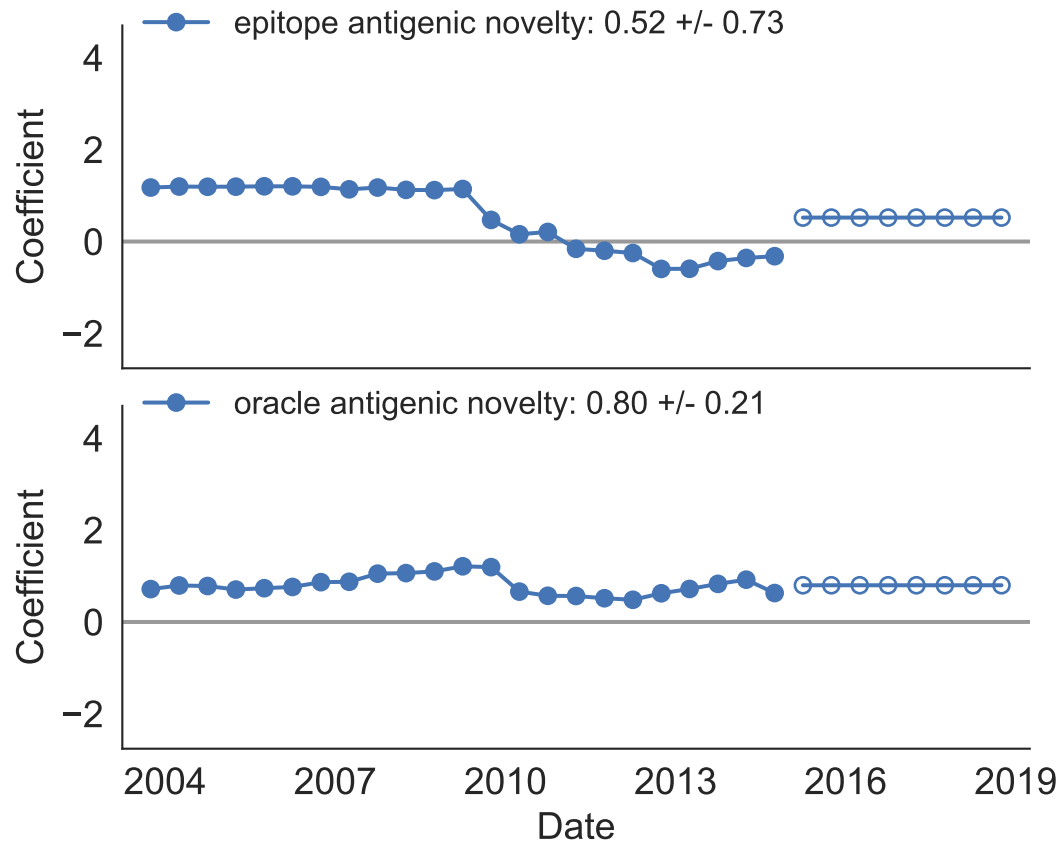**B**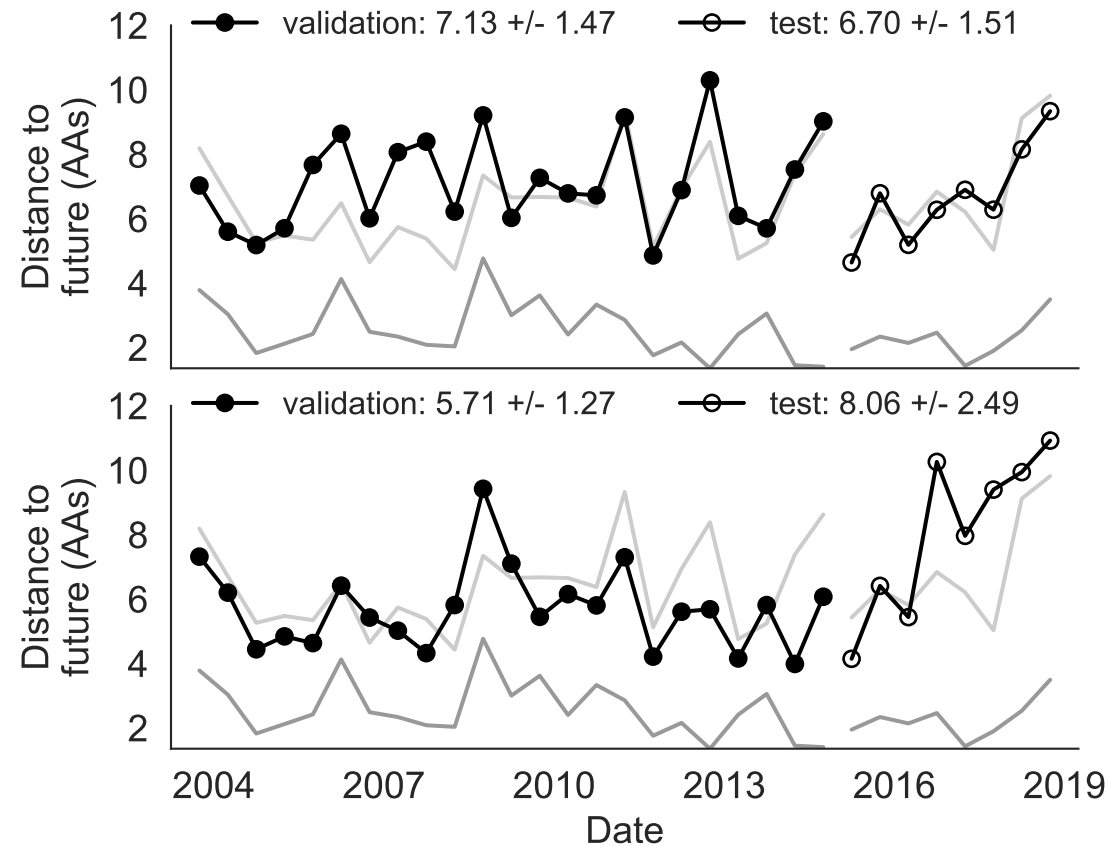

Supplement: supp [file elife-60067-supp-v1.zip]

**A**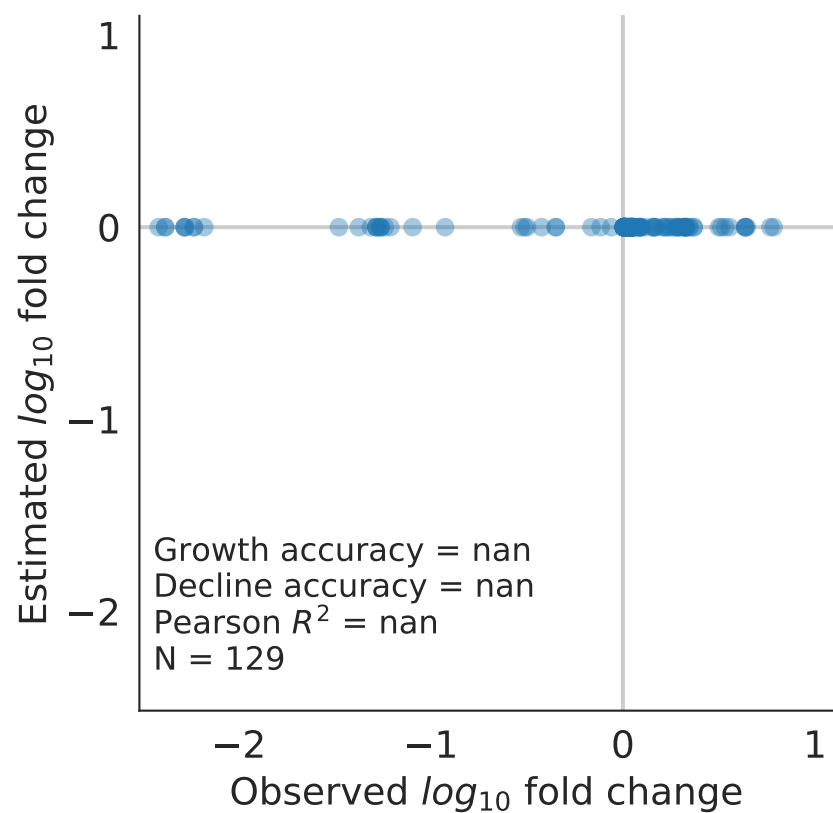**B**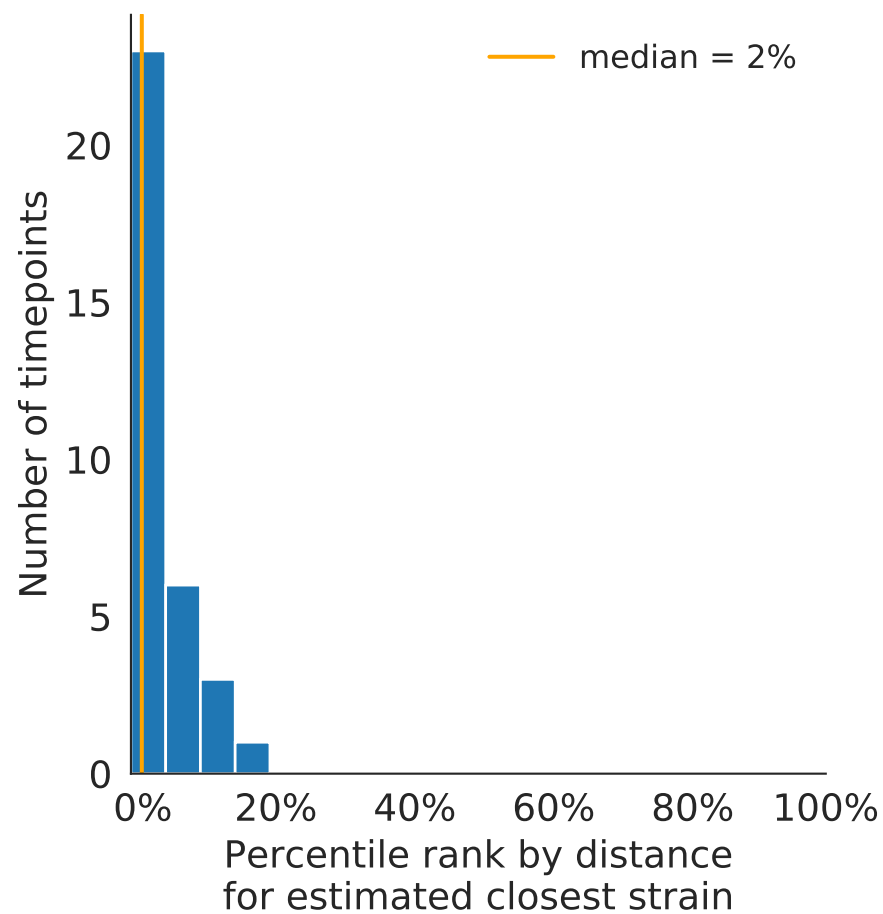**C**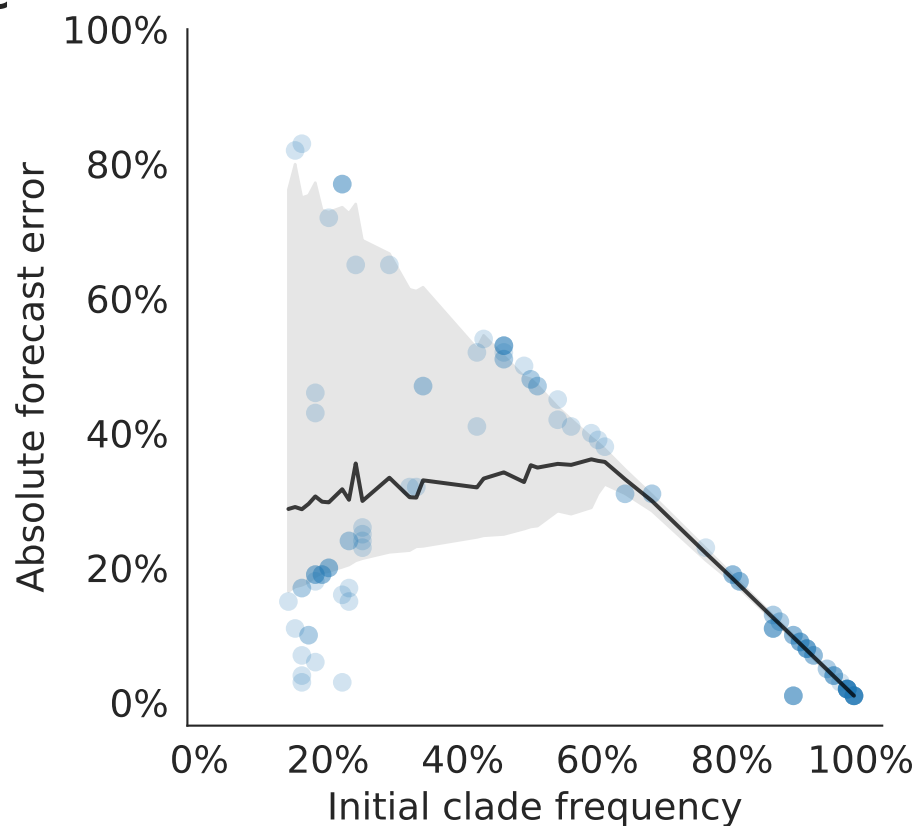**D**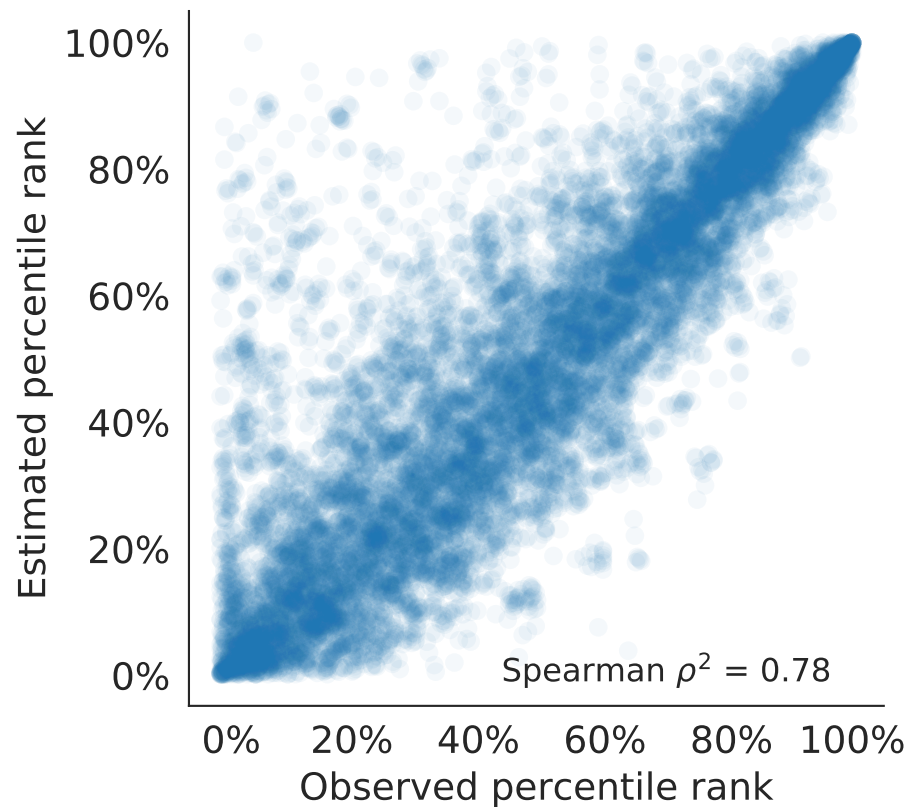

Supplement: supp [file elife-60067-supp-v1.zip]

**A**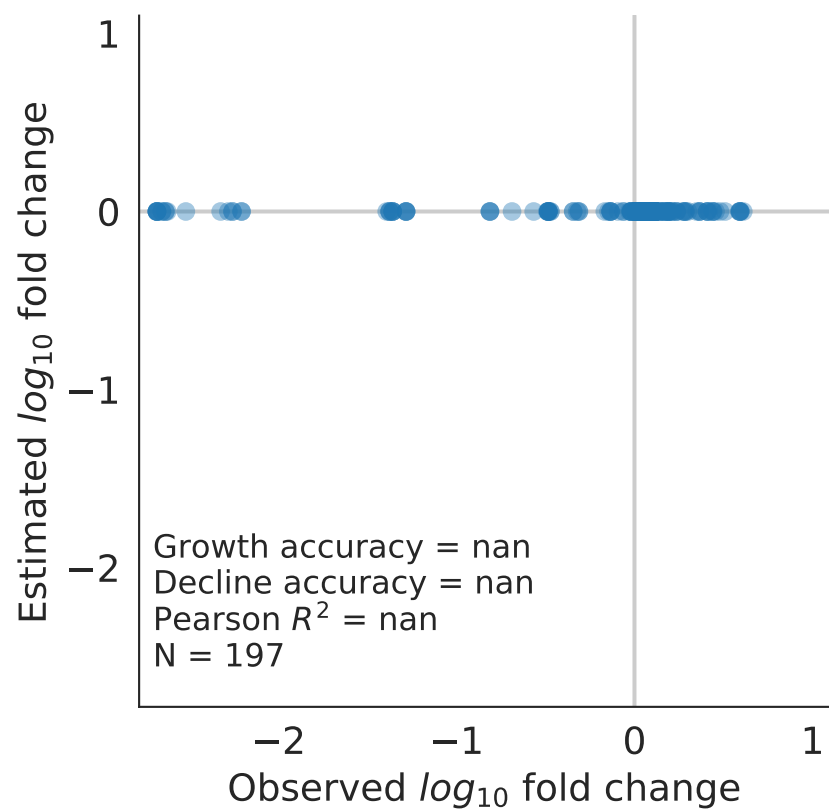**B**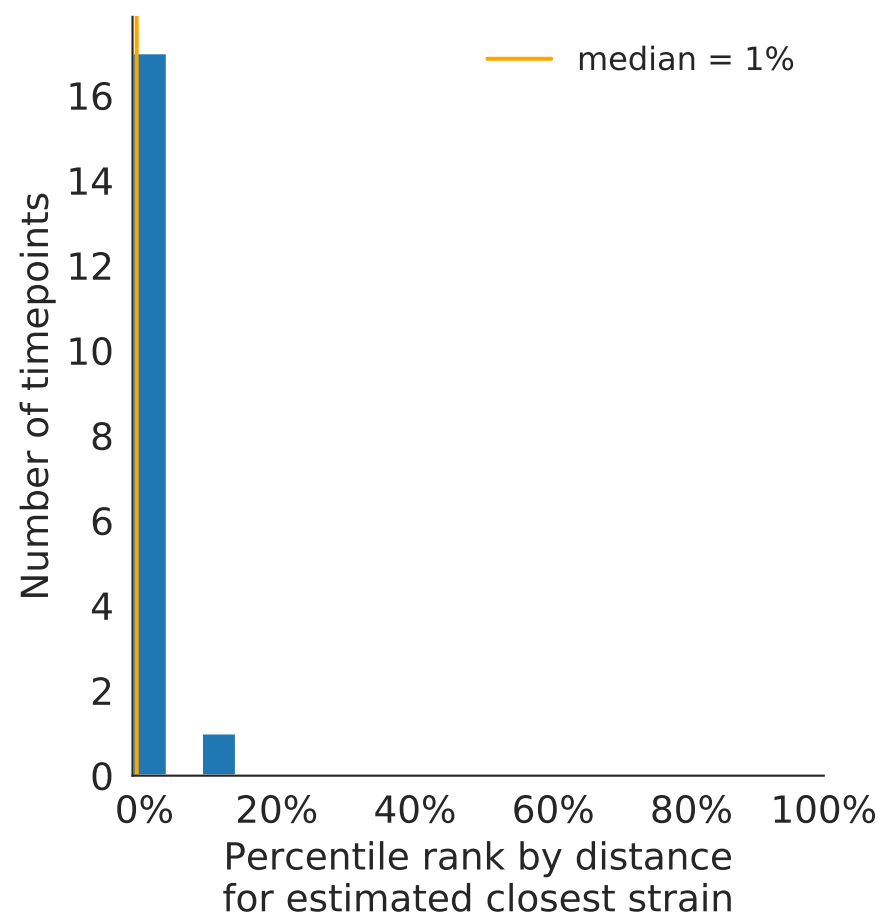**C**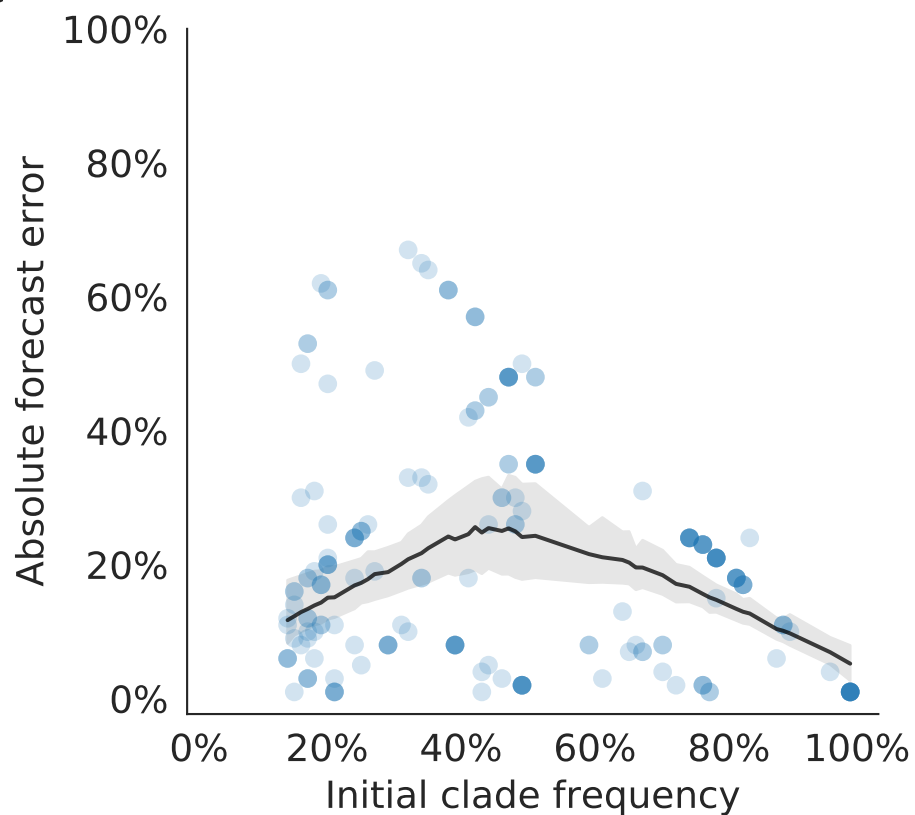**D**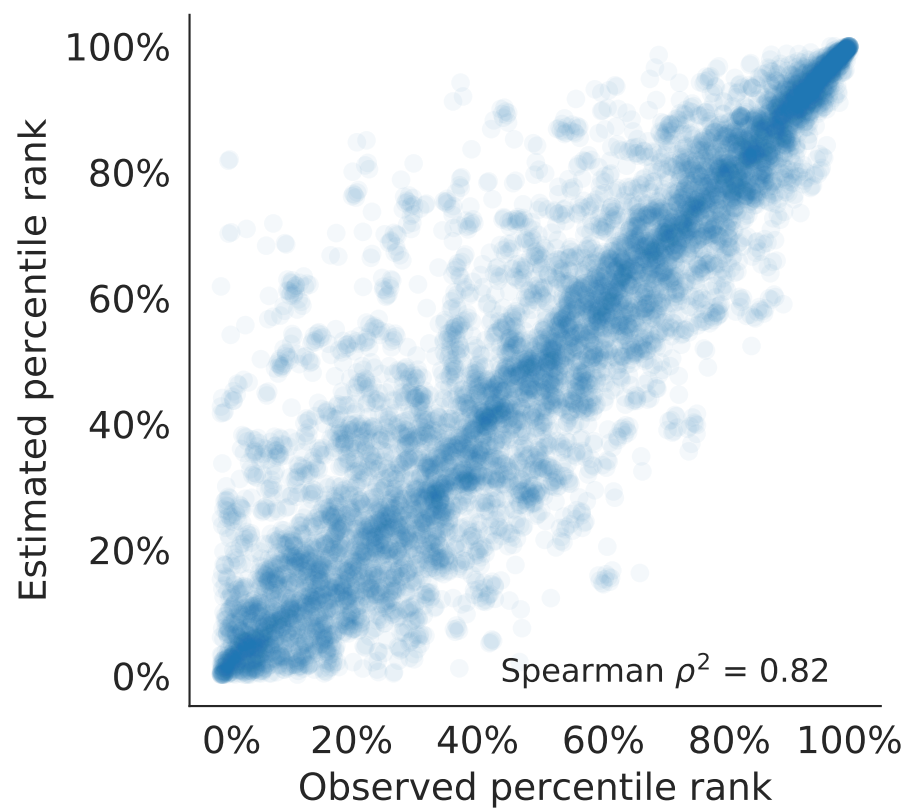

Supplement: supp [file elife-60067-supp-v1.zip]

**A**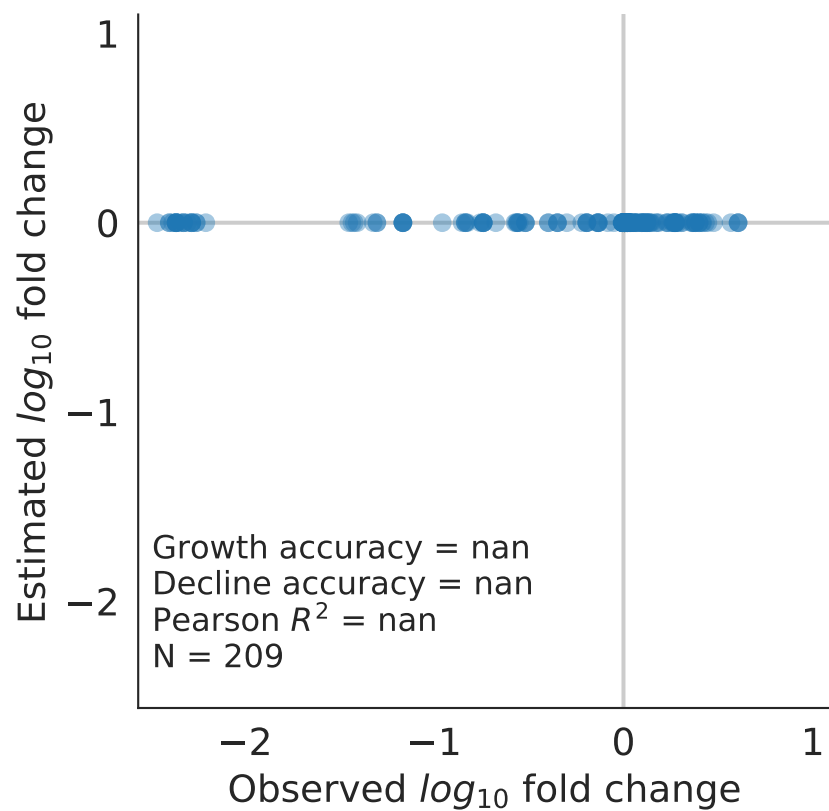**B**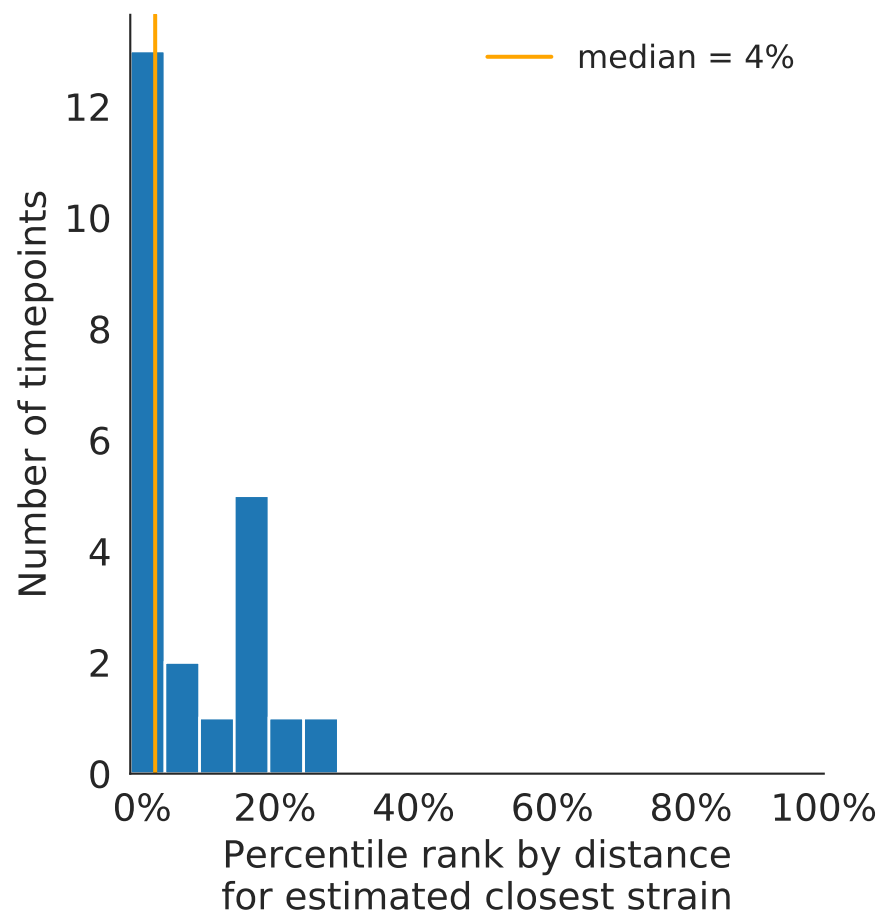**C**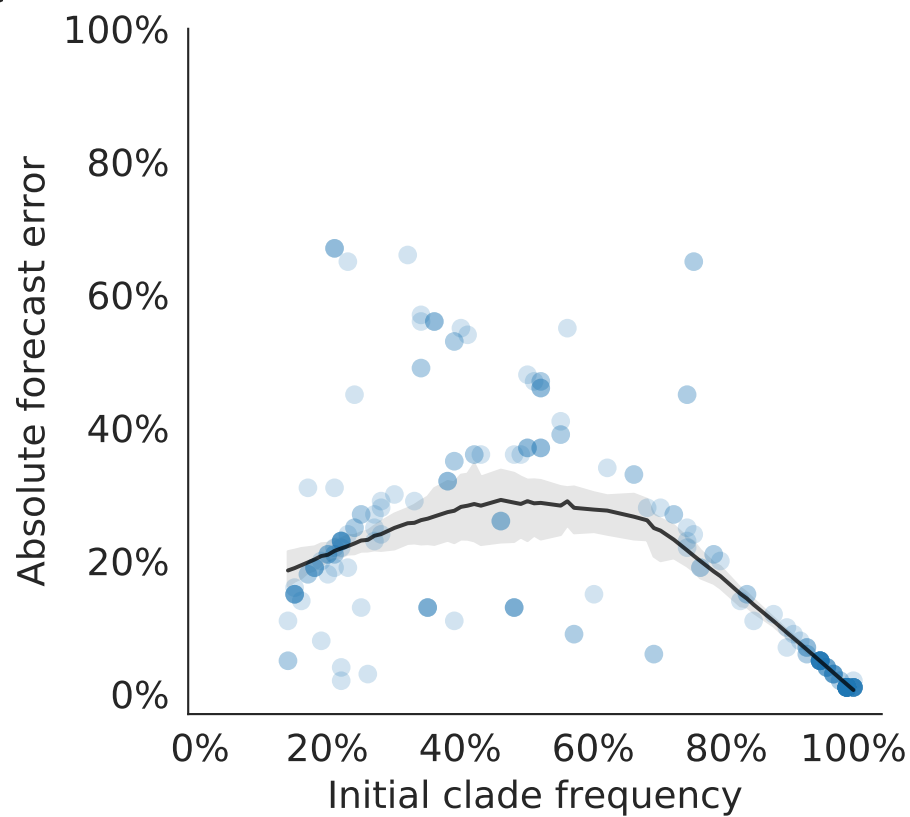**D**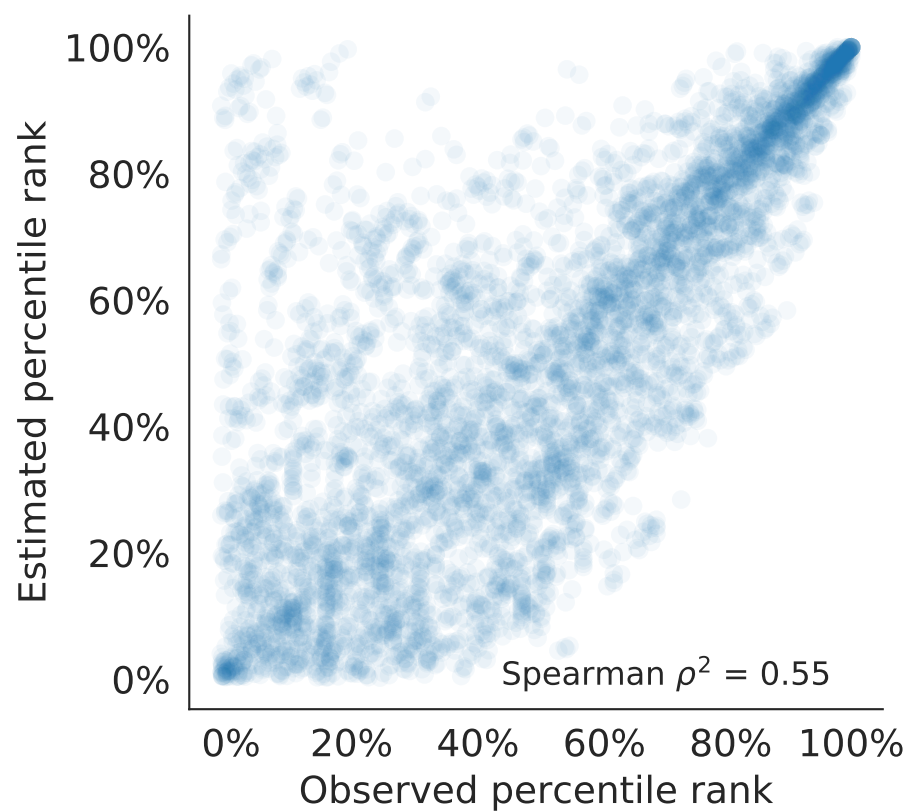

Supplement: supp [file elife-60067-supp-v1.zip]

**A**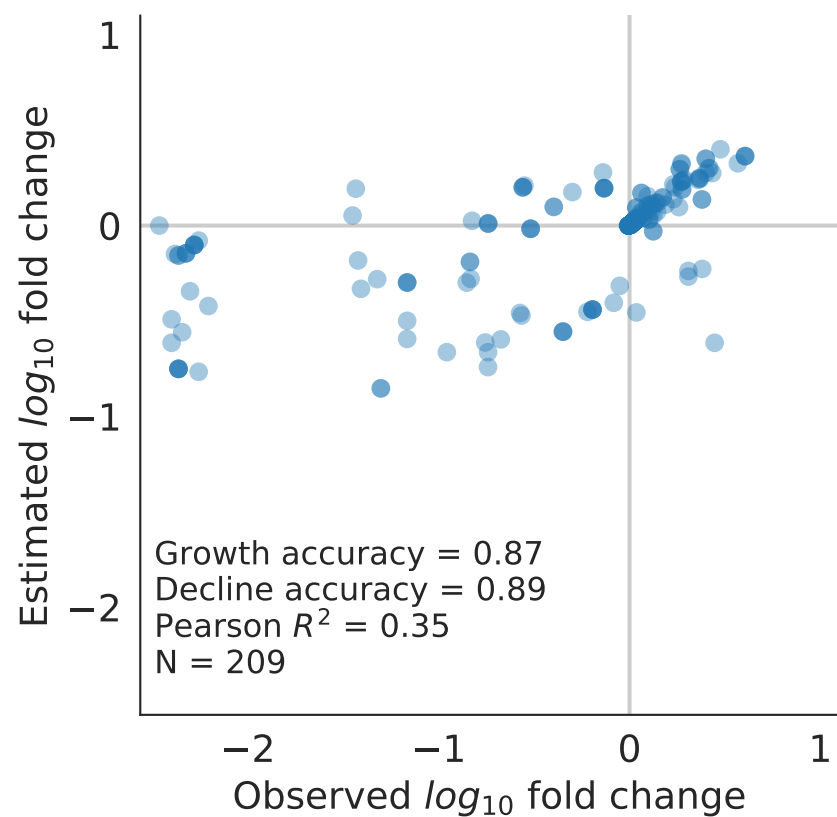**B**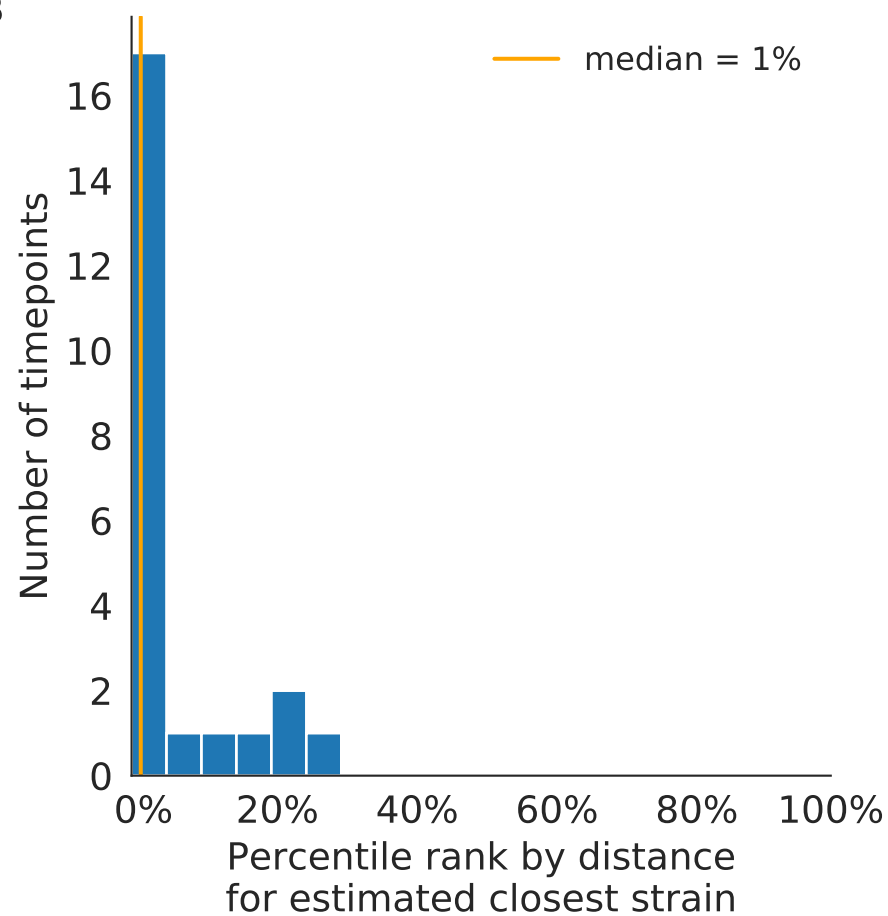**C**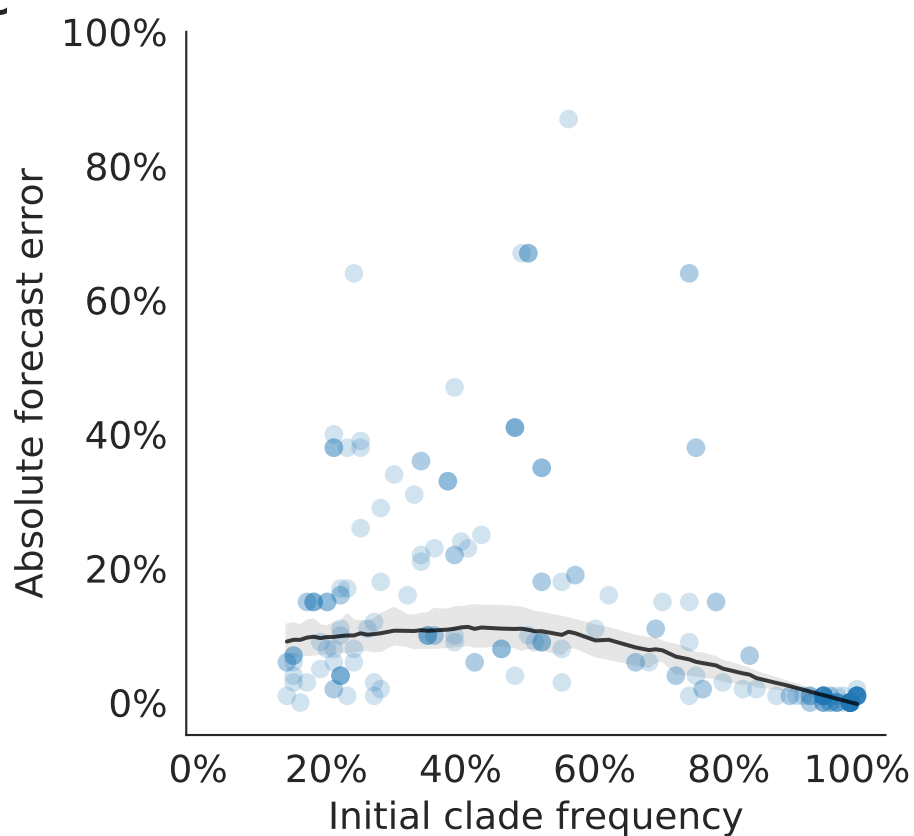**D**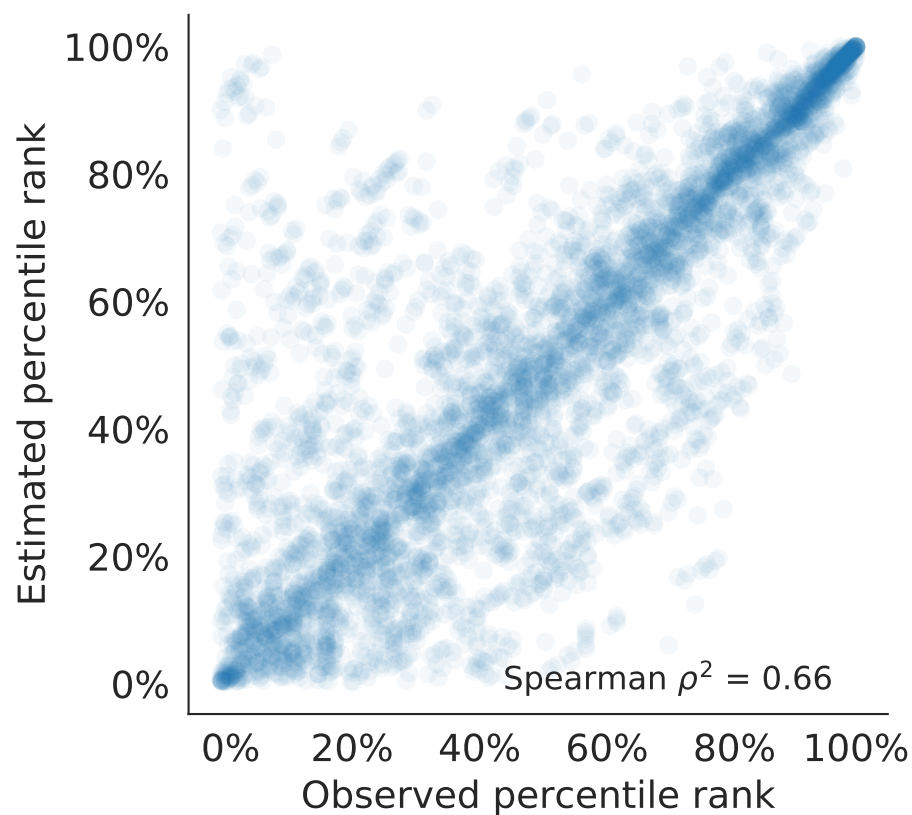

Supplement: supp [file elife-60067-supp-v1.zip]

**A**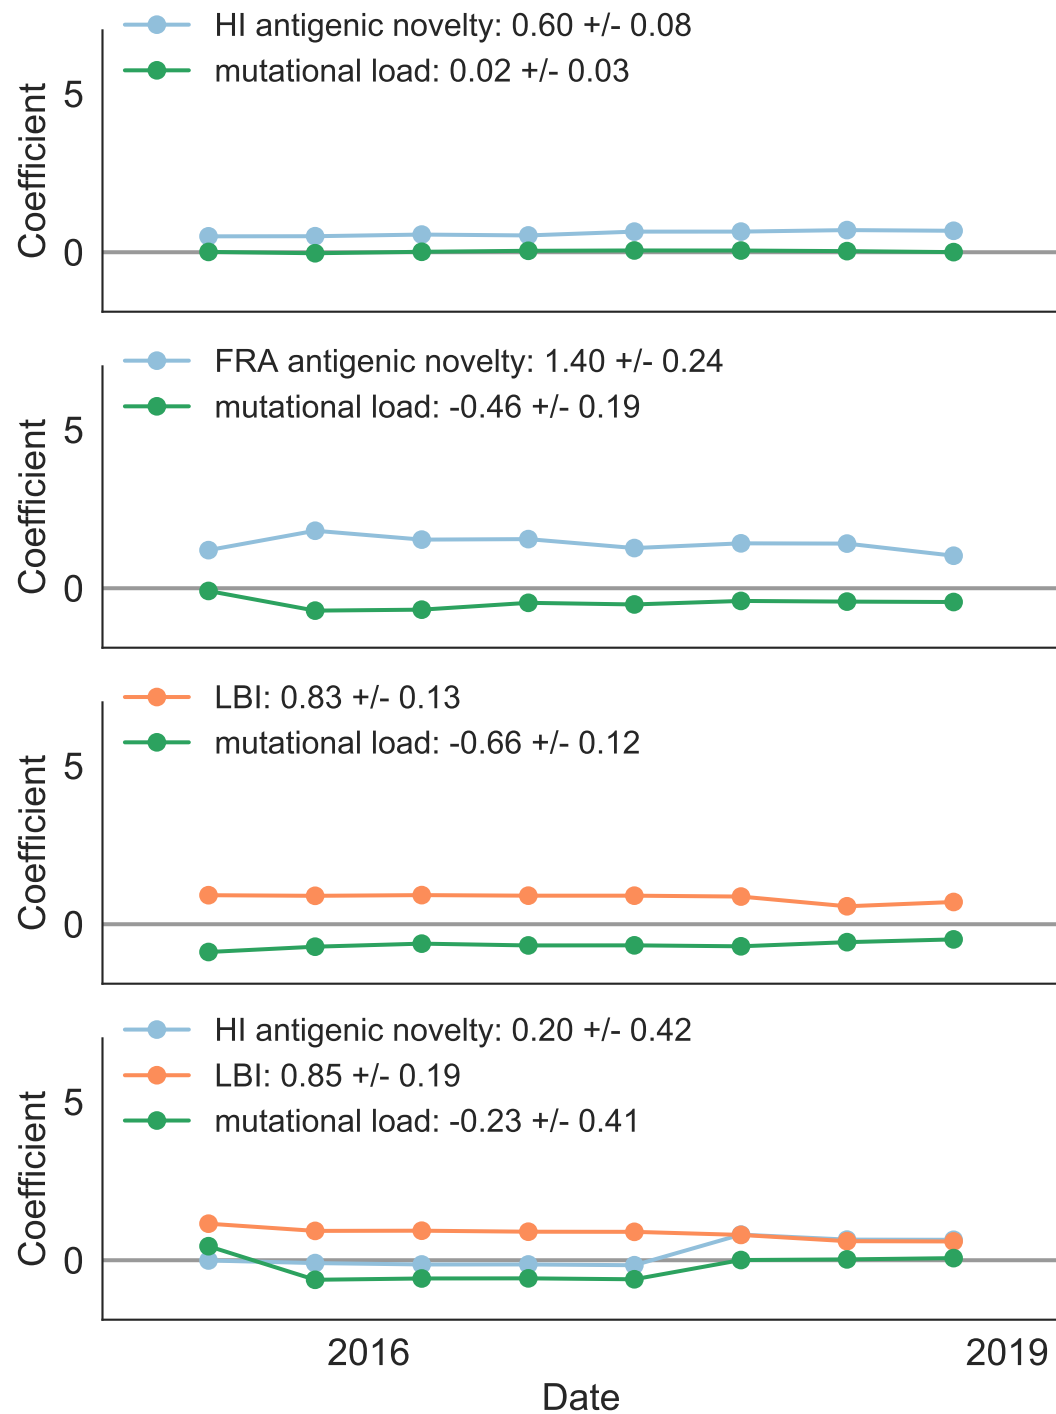**B**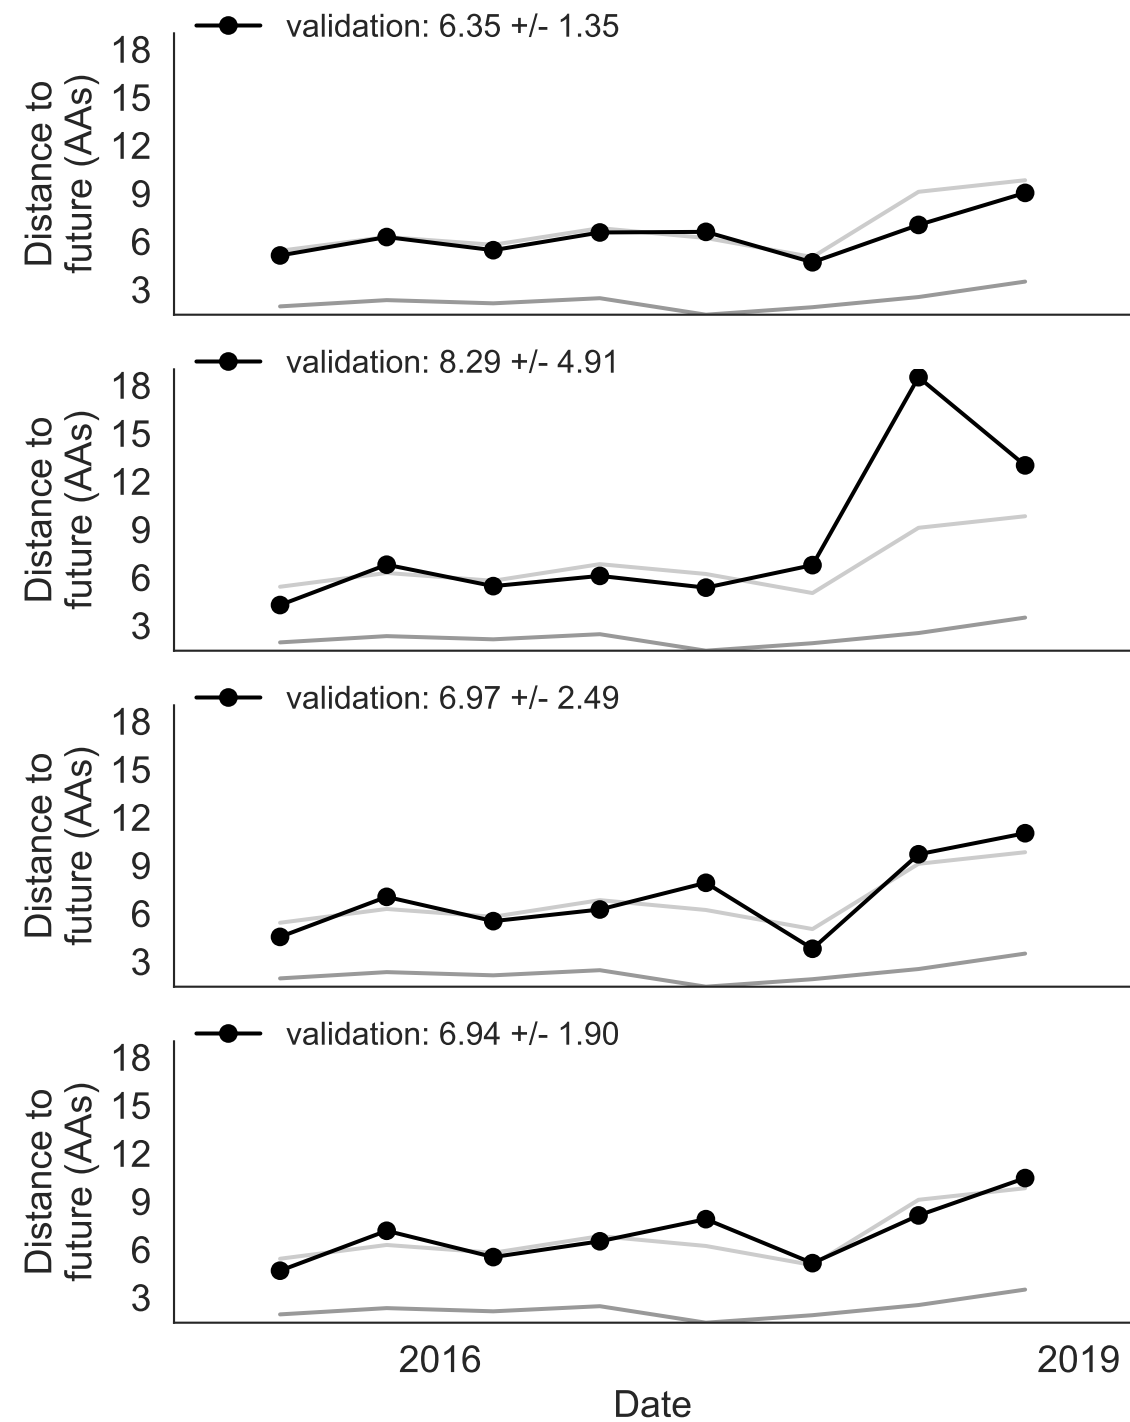

Supplement: supp [file elife-60067-supp-v1.zip]

**A**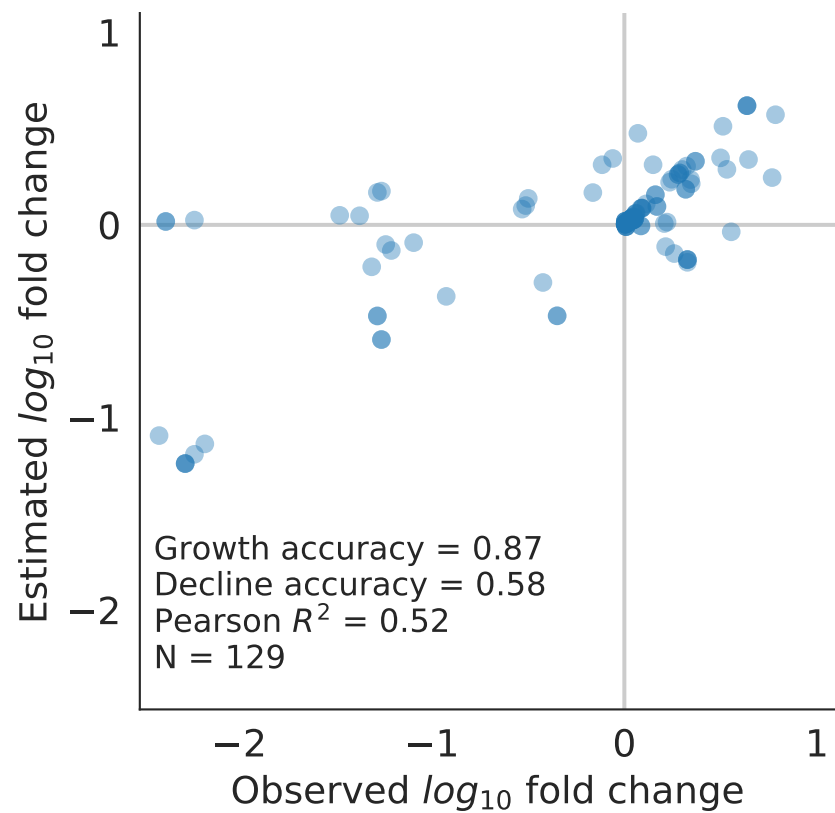**B**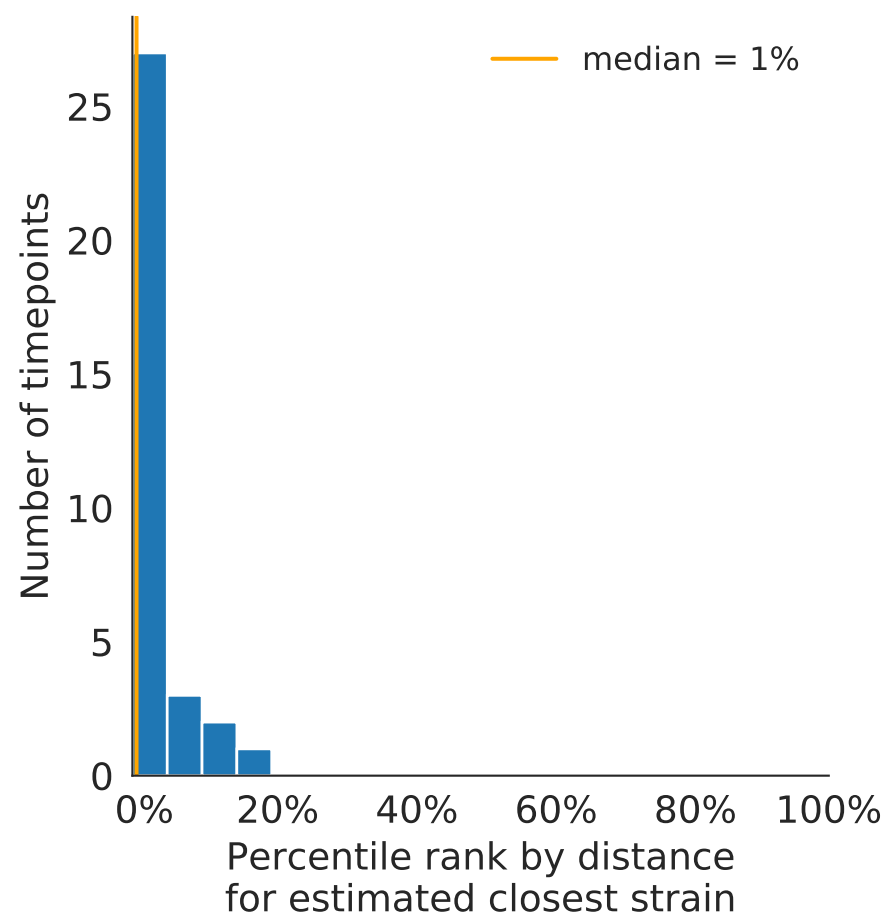**C**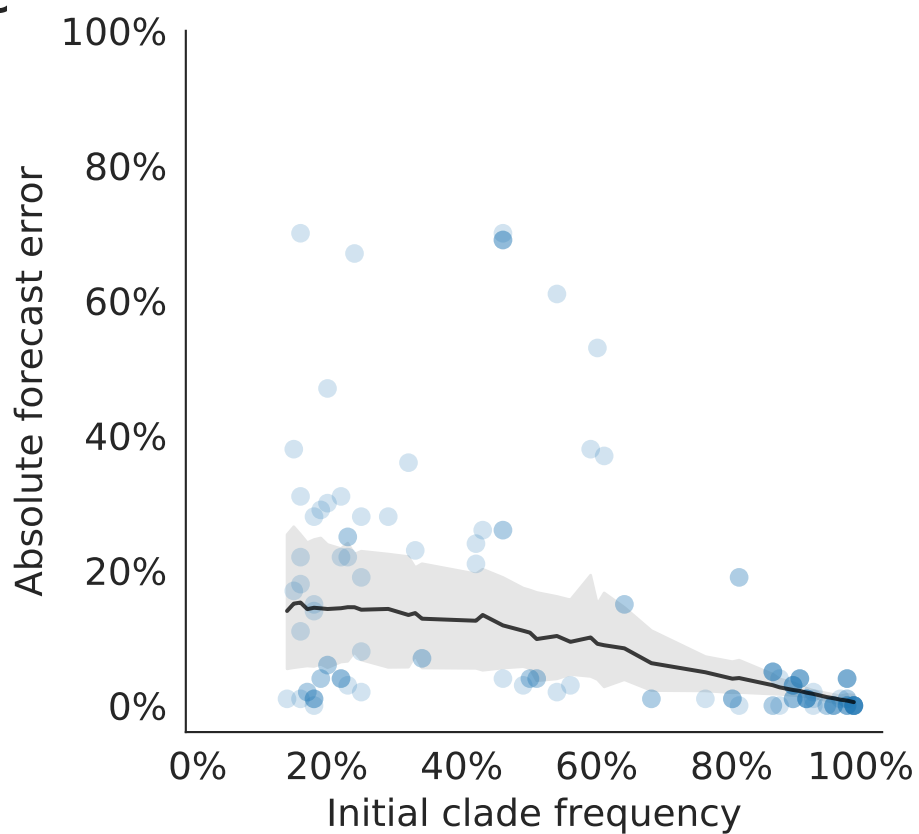**D**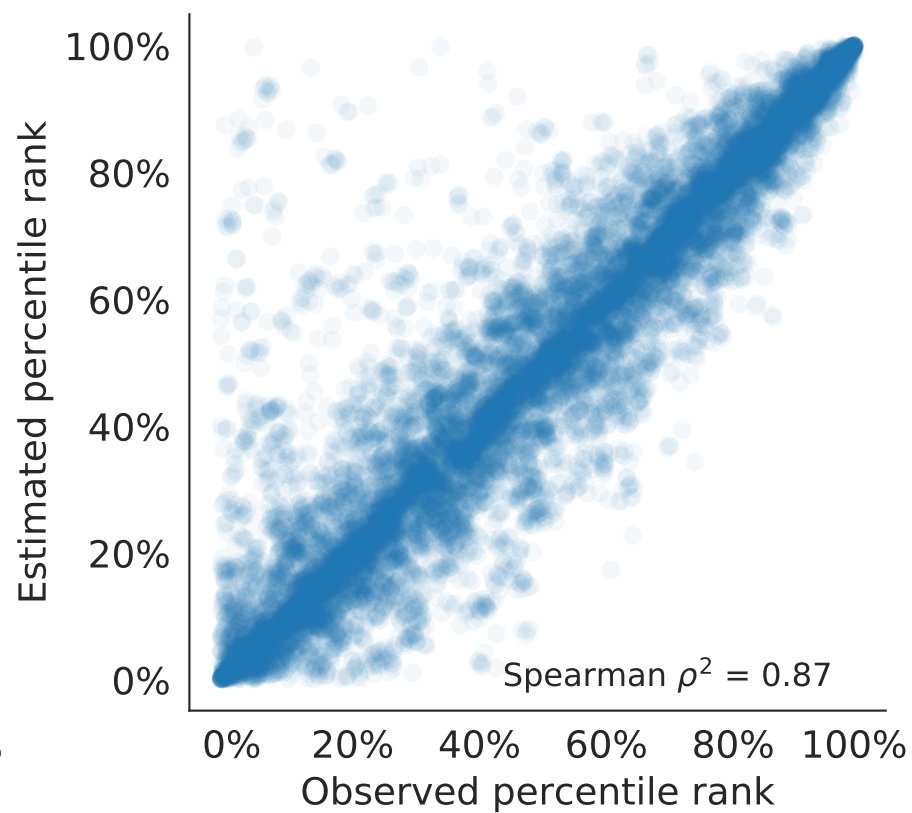

Supplement: supp [file elife-60067-supp-v1.zip]

**A**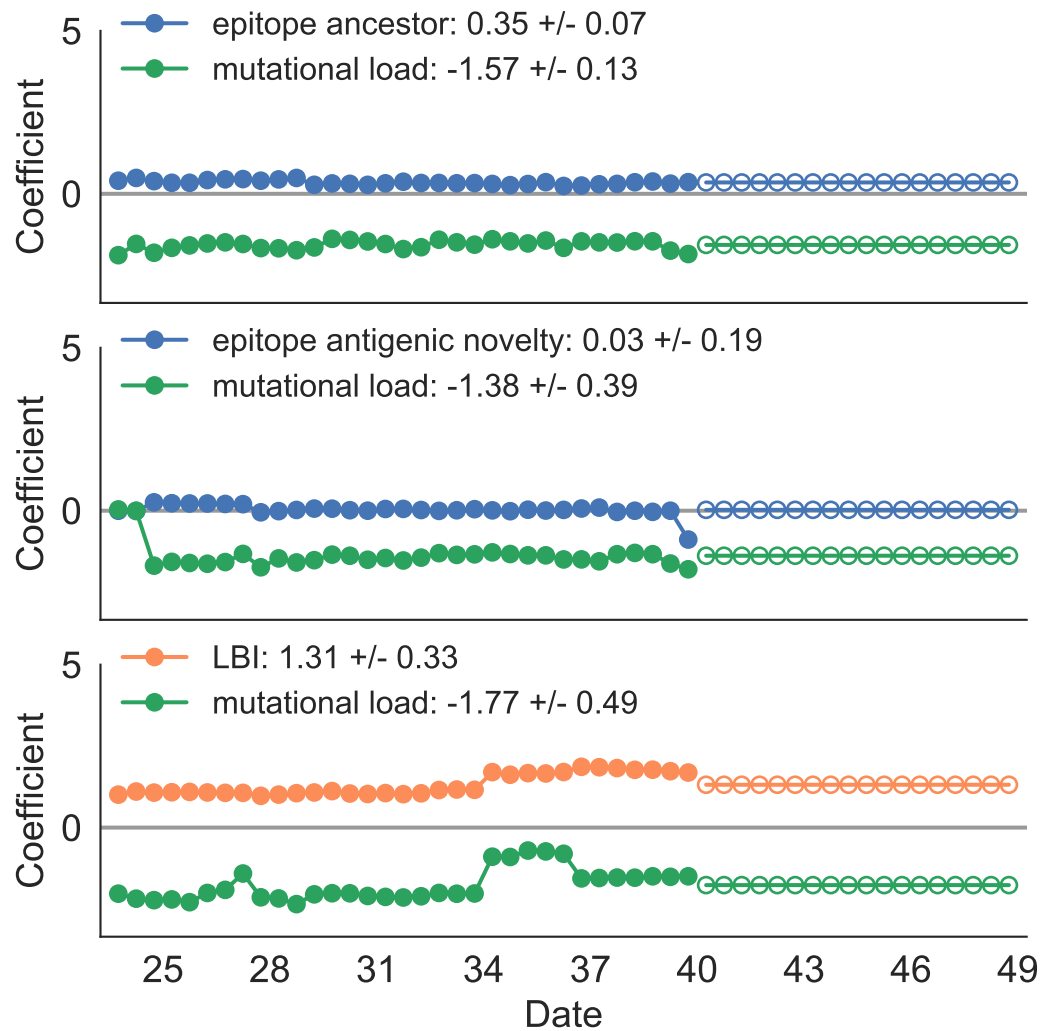**B**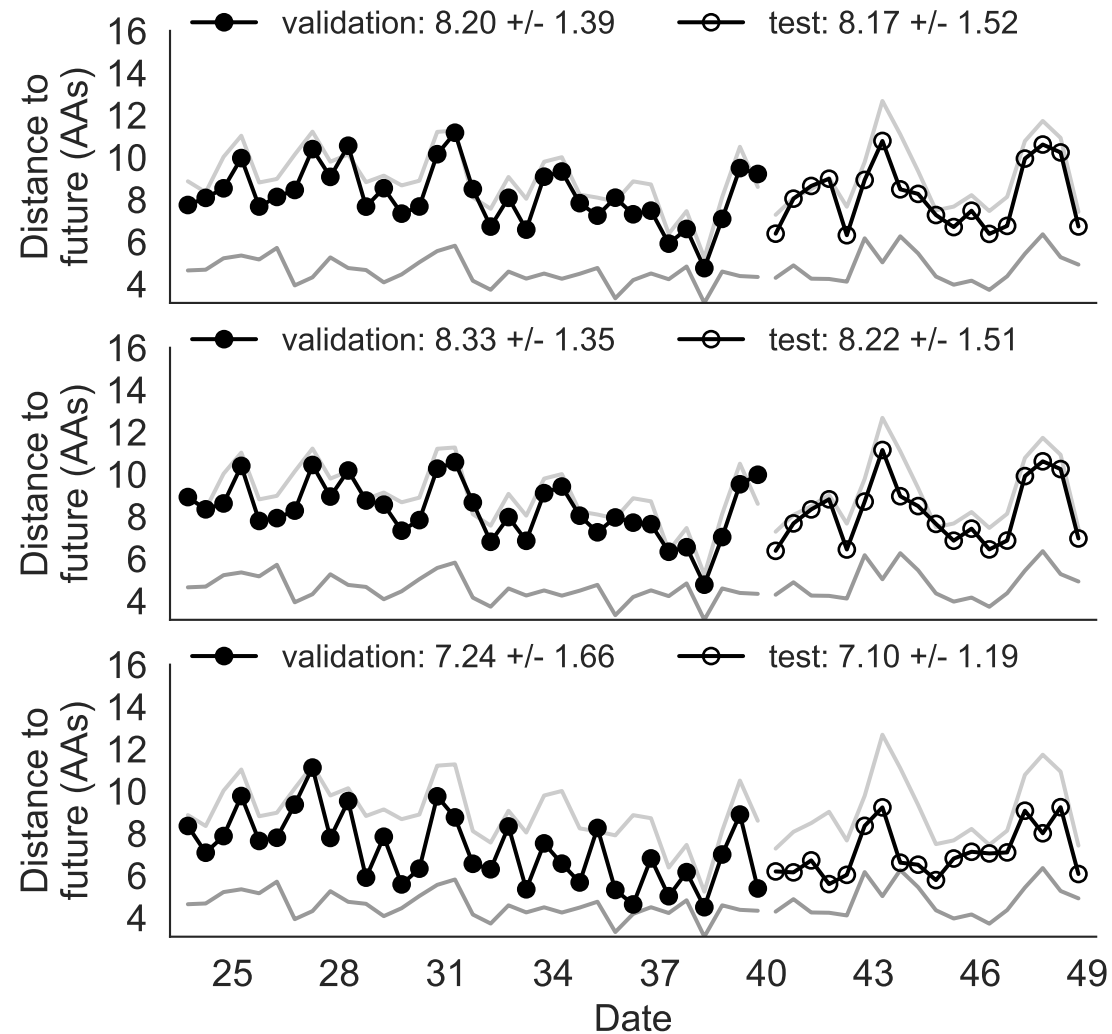

Supplement: supp [file elife-60067-supp-v1.zip]

**A**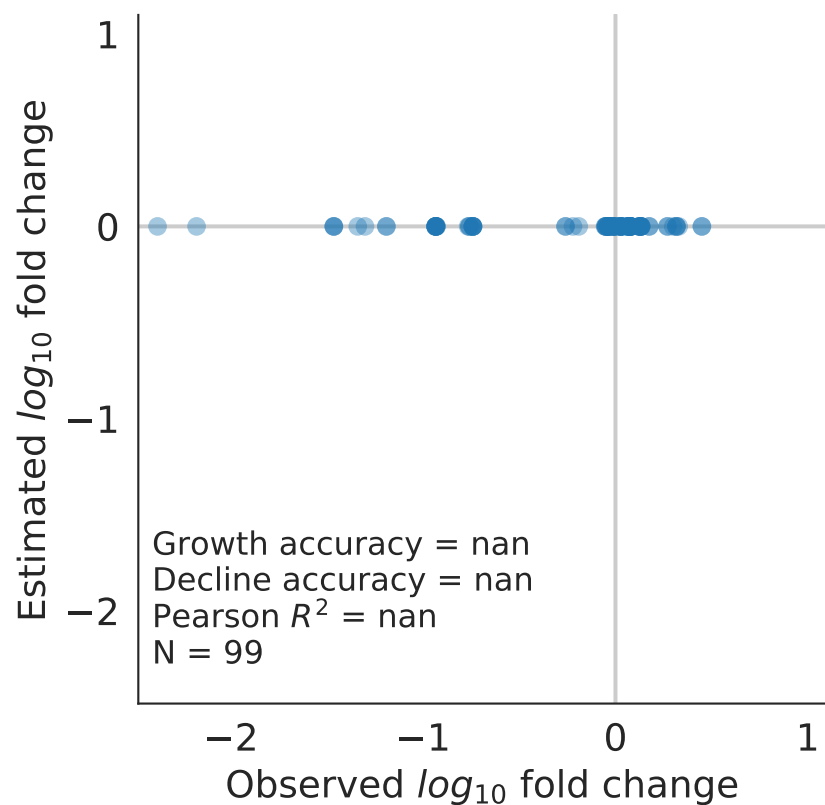**B**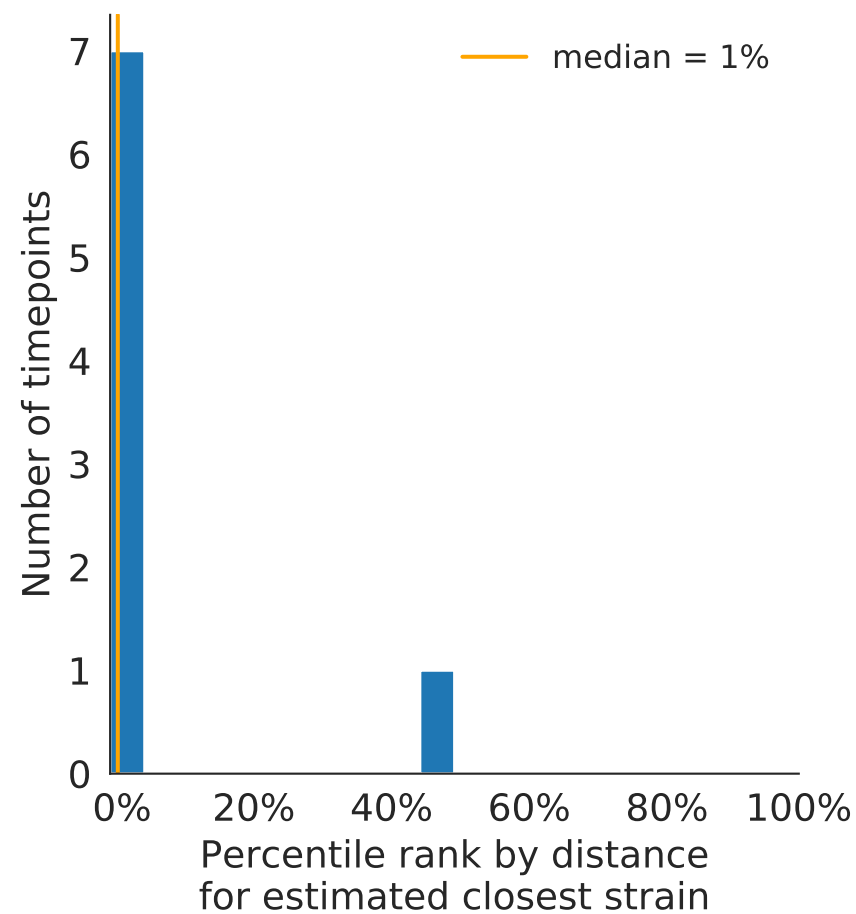**C**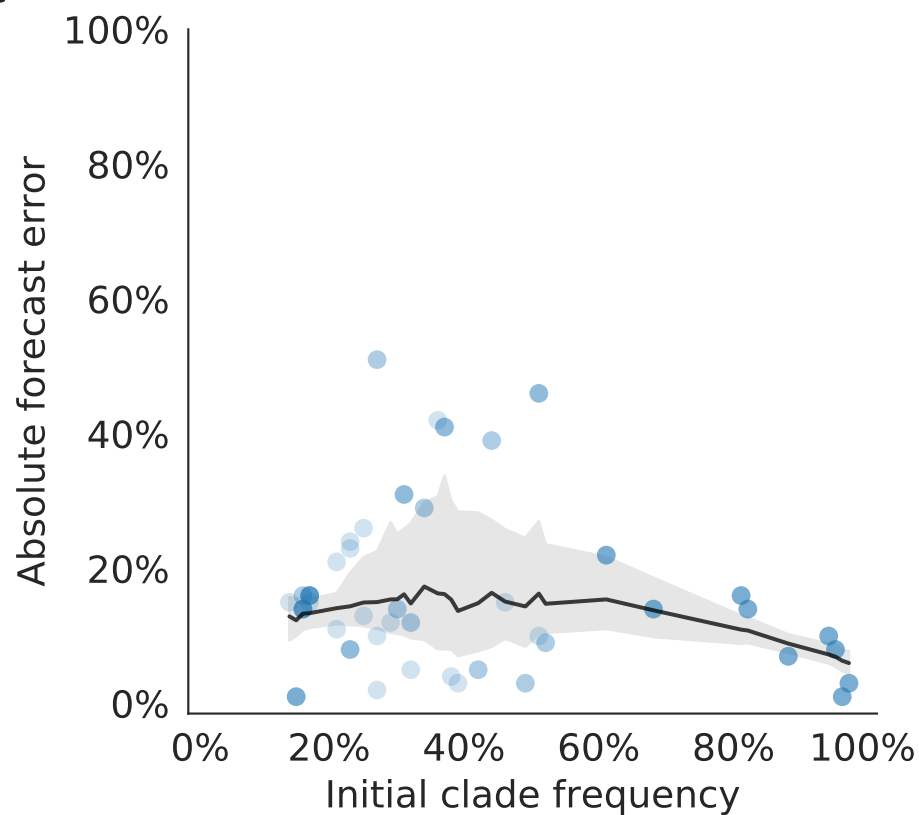**D**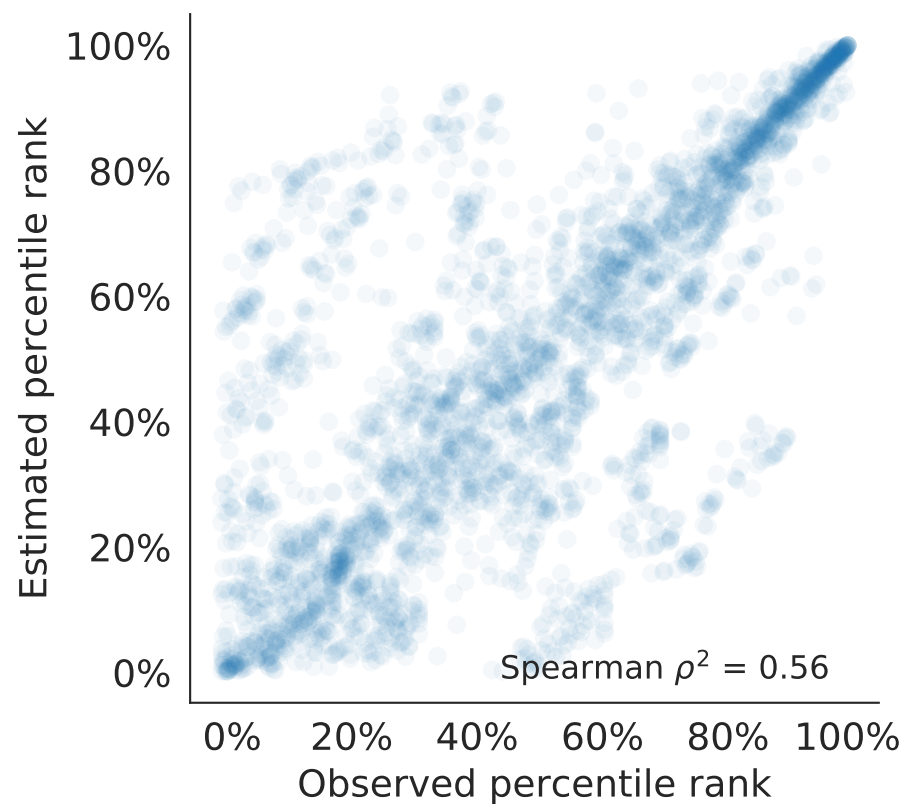

Supplement: supp [file elife-60067-supp-v1.zip]

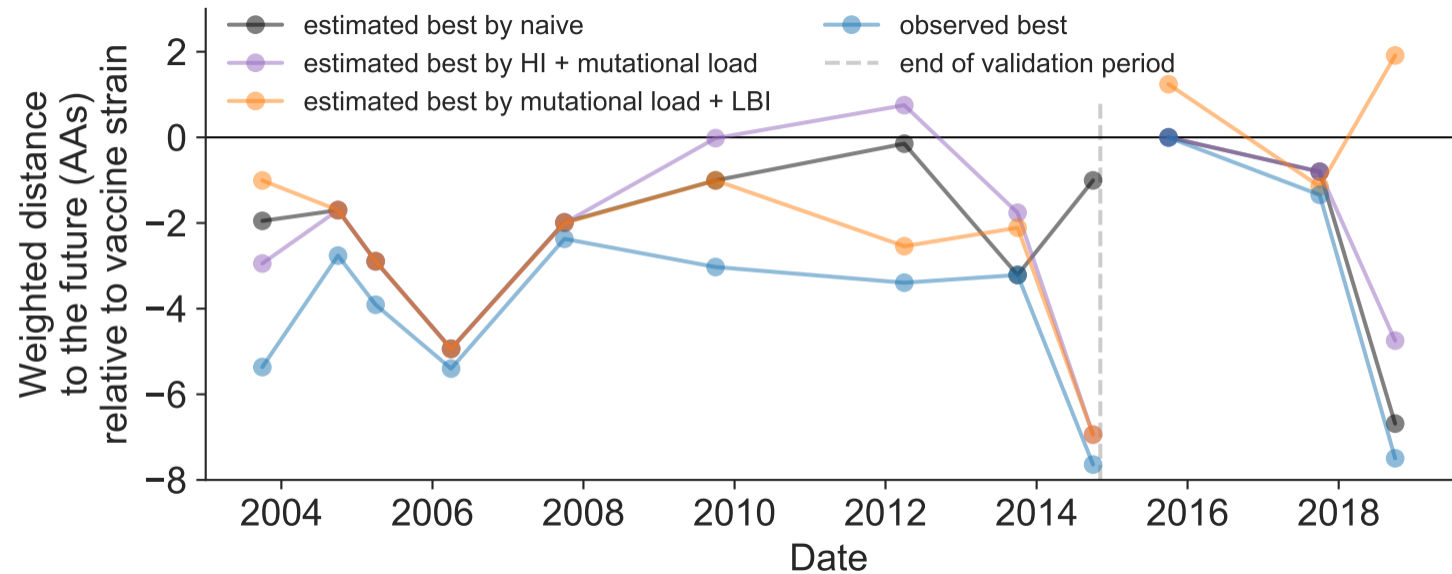

Supplement: supp [file elife-60067-supp-v1.zip]
